# Supplementary material
Source: publisher figshare collection journal article supplement (https://gsapubs.figshare.com/ndownloader/files/34869873)
Supplement: Supplementary file 1 [file 34869873]

## Sheet: DataSummary
TABLE S1a. SUMMARY OF SPECIMEN GEOCHEMISTRY AND LOCALITIES
Specimen	Taxa	Time Interval	Geographic Zone (Fig. 1)	Lat.	Long.	State	County	Stratigraphic Unit	Specimen Umbo δ13Ccarb (‰VPDB) DeltaV	Specimen Umbo δ18Ocarb (‰VPDB) DeltaV	Mn (ppm)	Fe (ppm)	Rank SEM preservation	Δ47 ± internal SE	Temp. ± SE (Petersen et al. 2019 calibration)	N	δ18Ow	Overall quality	Δ47 analytical instrument	Interpretation
D2052-Exo	Exogyra	preOAE2	2	34.99	-107.81	NM	Cibola	Tres Hermanos Ss.	0.6	-4.96	99.8	168	3	0.6327 ± 0.0038	46.6 ± 1.6	5	+1.53 ± 0.87	Good	MAT253	Reordered zone 2
D2402-PycnewA	P. newberryi	OAE2	2	37.17	-108.87	CO	Montezuma	Mancos Shale Fm.	5.04	-3.78	44.75	134.64	1.5	0.6348 ± 0.0059	45.7 ± 2.5	3	+1.81 ± 0.71	Bad	Nu	disqualified based on SEM
D2402-PycnewB	P. newberryi	OAE2	2	37.17	-108.87	CO	Montezuma	Mancos Shale Fm.	3.4	-5.93	314.2	1975.6	-	-	-	-	-	-	-	disqualified based on trace elements
D4353-PycnewA	P. newberryi	OAE2	3	37.07	-111.62	UT	Kane	Tropic Shale Fm.	6.5	-3.14	58.8	181.3	3	-	-	-	-	-	-	Another powder from specimen analyzed
D4353-PycnewA-Nu	P. newberryi	OAE2	3	37.07	-111.62	UT	Kane	Tropic Shale Fm.	6.5	-3.14	27.6	170	3	0.6706 ± 0.0102	31.7 ± 3.7	3	-0.03 ± 0.89	Good	Nu	Primary paleotemperature
D4353-PycnewB	P. newberryi	OAE2	3	37.07	-111.62	UT	Kane	Tropic Shale Fm.	3.97	-3.49	27.6	45.3	2	0.6452 ± 0.0320	42.2 ± 13.1	2	+1.61 ± 2.54	Bad	MAT253	Too few replicates, new powder measured on Nu Perspective
D4353-PycnewB	P. newberryi	OAE2	3	37.07	-111.62	UT	Kane	Tropic Shale Fm.	3.97	-3.49	27.7	52.3	2	0.6569 ± 0.0063	36.8 ± 2.4	3	+0.83 ± 0.67	Good	Nu	Primary paleotemperature
D5737-ExoA	Exogyra	preOAE2	2	35.01	-107.81	NM	Cibola	Mancos Shale Fm.	0.55	-5.07	119.7	159.7	2	0.6497 ± 0.0188	40.1 ± 7.6	3	+0.17 ± 1.52	Good	MAT253	Reordered zone 2
D5737-ExoB	Exogyra	preOAE2	2	35.01	-107.81	NM	Cibola	Mancos Shale Fm.	0.72	-5.29	94.4	124.7	3	0.6721 ± 0.0059	31.1 ± 2.2	5	-1.74 ± 0.90	Good	MAT253	Reordered zone 2
D5749-GryA	P. newberryi	OAE2	2	35.45	-107.99	NM	McKinley	Mancos Shale Fm.	2.09	-3.52	66.7	85.9	-	-	-	-	-	-	-	Not analyzed for D47
D5749-GryB	P. newberryi	OAE2	2	35.45	-107.99	NM	McKinley	Mancos Shale Fm.	2.69	-3.93	96.6	123.1	-	-	-	-	-	-	-	Not analyzed for D47
D5759-ExoA	Exogyra	preOAE2	2	35.51	-108.17	NM	McKinley	Tres Hermanos Ss.	-0.75	-6.97	277.6	610.9	-	-	-	-	-	-	-	disqualified based on trace elements
D5759-ExoB	Exogyra	preOAE2	2	35.51	-108.17	NM	McKinley	Mancos Shale Fm.	-0.84	-6.67	318.1	684.2	2	0.6552 ± 0.0108	37.8 ± 4.2	6	-2.02 ± 0.89	Bad	MAT253	disqualified based on trace elements
D5779-PycnewA	P. newberryi	OAE2	2	33.89	-106.75	NM	Socorro	Mancos Shale Fm.	6.61	-3.18	87.6	103.2	3	0.6514	38.9	1	+0.59	Bad	MAT253	Too few replicates
D5779-PycnewB	P. newberryi	OAE2	2	33.89	-106.75	NM	Socorro	Mancos Shale Fm.	4.99	-5.29	315.4	444.3	-	-	-	-	-	-	-	disqualified based on trace elements
D5779-PycnewC	P. newberryi	OAE2	2	33.89	-106.75	NM	Socorro	Mancos Shale Fm.	5.08	-4.54	87.9	119	-	-	-	-	-	-	-	Not analyzed for D47
D5792-PycnewA	P. newberryi	OAE2	2	34.39	-107.37	NM	Socorro	Mancos Shale Fm.	4.25	-4.26	202.3	122	-	-	-	-	-	-	-	disqualified based on trace elements
D5792-PycnewB	P. newberryi	OAE2	2	34.39	-107.37	NM	Socorro	Mancos Shale Fm.	3.69	-4.68	241.6	483.8	1	0.3352	431.1	1	+33.07	Bad	MAT253	disqualified based on trace elements and SEM. Another replicate of sample was flagged for contamination (high D48 values), suggesting D47 temperature and d18Ow values are not reliable.
D6175-PycnewA	P. newberryi	OAE2	2	34.29	-109.05	AZ	Apache	Twowells Sandstone	4.51	-3.8	84.3	140.9	3.5	-	-	-	-	-	-	Another powder from specimen analyzed
D6175-PycnewA-Nu	P. newberryi	OAE2	2	34.29	-109.05	AZ	Apache	Twowells Sandstone	4.51	-3.8	71	150.2	3.5	0.6372 ± 0.0121	44.8 ± 5.0	2	+2.22 ± 1.11	Good	Nu	Reordered zone 2
D6175-PycnewB	P. newberryi	OAE2	2	34.29	-109.05	AZ	Apache	Twowells Sandstone	4.45	-3.9	148	118.3	3	0.6385 ± 0.0258	44.7 ± 10.8	2	+0.75 ± 1.98	Bad	MAT253	Too few replicates, new powder measured on Nu Perspective
D6175-PycnewB-Nu	P. newberryi	OAE2	2	34.29	-109.05	AZ	Apache	Twowells Sandstone	4.45	-3.9	55.7	57.3	3	0.6229 ± 0.0096	51.0 ± 4.2	3	+2.49 ± 0.97	Good	Nu	Reordered zone 2
D6816-PycnewA	P. newberryi	OAE2	2	33.12	-107.2	NM	Sierra	Mancos Shale Fm.	4.56	-10.28	59.5	520.3	-	-	-	-	-	-	-	disqualified based on trace elements
D6816-PycnewB	P. newberryi	OAE2	2	33.12	-107.2	NM	Sierra	Mancos Shale Fm.	5.05	-10.08	64	382.8	-	-	-	-	-	-	-	Another powder from specimen analyzed
D6816-PycnewB-Nu	P. newberryi	OAE2	2	33.12	-107.2	NM	Sierra	Mancos Shale Fm.	5.05	-10.08	56.8	499.4	2	0.5435 ± 0.0107	93.5 ± 6.8	3	+3.61 ± 0.96	Bad	Nu	disqualified based on trace elements
D6899-OstA	Ostrea	preOAE2	NA	32.81	-97.05	TX	Tarrant	Lewisville Member	1.33	-8.28	405	1591.5	-	-	-	-	-	-	-	disqualified based on trace elements
D6899-OstB	Ostrea	preOAE2	NA	32.81	-97.05	TX	Tarrant	Lewisville Member	1.21	-8.53	485.5	829.1	-	-	-	-	-	-	-	disqualified based on trace elements
D6899-OstC	Ostrea	preOAE2	NA	32.81	-97.05	TX	Tarrant	Lewisville Member	0.3	-8.11	644.2	1409.2	3	0.6687 ± 0.0105	32.5 ± 3.8	4	-4.31 ± 0.94	Bad	MAT253	disqualified based on trace elements
D7361-PycnewA	P. newberryi	OAE2	2	37.92	-108.68	CO	San Miguel	Mancos Shale Fm.	3.93	-4.44	326.2	583.4	-	-	-	-	-	-	-	disqualified based on trace elements
D7361-PycnewB	P. newberryi	OAE2	2	37.92	-108.68	CO	San Miguel	Mancos Shale Fm.	5.21	-3.42	43.4	85	-	-	-	-	-	-	-	Not analyzed for D47
D7361-PycnewC	P. newberryi	OAE2	2	37.92	-108.68	CO	San Miguel	Mancos Shale Fm.	3.93	-4.46	69.6	96.9	1	0.6353	45.4	1	+1.49	Bad	MAT253	disqualified based on SEM
D8304-PycnspA	P. kellumi	preOAE2	1	44.45	-104.9	WY	Crook	Greenhorn Fm.	1.34	-3.2	37.6	156.1	3	-	-	-	-	-	-	Another powder from specimen analyzed
D8304-PycnspA-Nu	P. kellumi	preOAE2	1	44.45	-104.9	WY	Crook	Greenhorn Fm.	1.34	-3.2	16.8	180.3	3	0.6875 ± 0.0090	25.6 ± 3.1	3	-0.62 ± 0.71	Good	Nu	Primary Zone 1
D8304-PycnspB	P. kellumi	preOAE2	1	44.45	-104.9	WY	Crook	Greenhorn Fm.	2.43	-3.02	12.9	22.3	3.5	0.7457	7.1	1	-4.96	Bad	MAT253	Too few replicates, new powder measured on Nu Perspective
D8304-PycnspB-Nu	P. kellumi	preOAE2	1	44.45	-104.9	WY	Crook	Greenhorn Fm.	2.43	-3.02	6.9	37.8	3.5	0.6866 ± 0.0052	25.8 ± 1.9	3	-0.70 ± 0.72	Good	Nu	Primary Zone 1
D8407-Pycnsp	P. kellumi	preOAE2	1	44.58	-108.16	WY	Big Horn	Frontier Fm.	2.26	-4.4	23.4	92	3	0.6668 ± 0.0071	33.0 ± 2.6	3	-0.43 ± 1.20	Good	MAT253	Primary Zone 1
D9018-PycnewA-1	P. newberryi	OAE2	3	35.96	-110.84	AZ	Coconino	Mancos Shale Fm.	5.02	-3.19	55.3	67.4	2	-	-	-	-	-	-	Another powder from specimen analyzed
D9018-PycnewA-2	P. newberryi	OAE2	3	35.96	-110.84	AZ	Coconino	Mancos Shale Fm.	5.02	-3.19	166	672.4	2	0.6936 ± 0.0314	23.9 ± 10.7	2	-2.05 ± 2.29	Bad	MAT253	disqualified based on trace elements
D9018-PycnewB	P. newberryi	OAE2	3	35.96	-110.84	AZ	Coconino	Mancos Shale Fm.	5.72	-3.02	33.8	23.4	2	-	-	-	-	-	-	Another powder from specimen analyzed
D9018-PycnewB-Nu	P. newberryi	OAE2	3	35.96	-110.84	AZ	Coconino	Mancos Shale Fm.	5.72	-3.02	29.2	37.2	2	0.6583 ± 0.0059	36.2 ± 2.3	3	+1.24 ± 0.80	Good	Nu	Primary Zone 3
D9020-PycnewA	P. newberryi	OAE2	3	36.18	-109.88	AZ	Apache	Mancos Shale Fm.	4.21	-3.69	102	137.8	3.5	-	-	-	-	-	-	Another powder from specimen analyzed
D9020-PycnewA-Nu	P. newberryi	OAE2	3	36.18	-109.88	AZ	Apache	Mancos Shale Fm.	4.21	-3.69	71.1	361.2	3.5	0.6782 ± 0.0077	28.8 ± 2.7	3	-0.63 ± 0.71	Good	Nu	Primary Zone 3
D9020-PycnewB	P. newberryi	OAE2	3	36.18	-109.88	AZ	Apache	Mancos Shale Fm.	3.67	-3.81	74.9	129.7	3	0.6804 ± 0.0089	28.1 ± 3.1	4	-1.14 ± 1.00	Good	MAT253	Primary Zone 3
D10440-PycnewA	P. newberryi	OAE2	2	39.21	-108.87	CO	Mesa	Mancos Shale Fm.	1.45	-4.04	1078.4	1360.4	2	0.6190 ± 0.0054	52.6 ± 2.4	2	+3.16 ± 1.37	Bad	MAT253	disqualified based on trace elements
D10440-PycnewB	P. newberryi	OAE2	2	39.21	-108.87	CO	Mesa	Mancos Shale Fm.	3.06	-4.28	573.6	848.1	-	-	-	-	-	-	-	disqualified based on trace elements
D11792-PyckelA	P. kellumi	preOAE2	1	42.53	-106.58	WY	Natrona	Frontier Fm.	1.91	-5.21	87.4	55	3	0.5984	62.3	1	3.37	Good	MAT253	Too few replicates, new powder measured on Nu Perspective
D11792-PyckelA	P. kellumi	preOAE2	1	42.53	-106.58	WY	Natrona	Frontier Fm.	1.91	-5.21	87.4	55	3	0.6534 ± 0.0103	38.3 ± 4.1	3	-0.78 ± 0.85	Good	Nu	Primary Zone 1
D11792-PyckelB	P. kellumi	preOAE2	1	42.53	-106.58	WY	Natrona	Frontier Fm.	1.99	-5.41	399.3	194.4	-	-	-	-	-	-	-	disqualified based on trace elements
D11889-PycnewA	P. newberryi	OAE2	2	38.7	-107.9	CO	Delta	Mancos Shale Fm.	0.06	-4.1	399.7	1739.6	3	0.671 ± 0.0688	37.2 ± 23.6	3	-0.03 ± 4.49	Bad	MAT253	disqualified based on trace elements
D11889-PycnewB	P. newberryi	OAE2	2	38.7	-107.9	CO	Delta	Mancos Shale Fm.	1.12	-4	48.3	125.9	2	0.6408 ± 0.0046	43.2 ± 1.9	4	+1.87 ± 1.30	Good	MAT253	Reordered zone 2
D12471-PycnewA	P. newberryi	OAE2	3	37.54	-111.44	UT	Kane	Tropic Shale Fm.	3.44	-5	141.1	282.5	1	-	-	-	-	-	-	disqualified based on SEM
D12471-PycnewA-Nu	P. newberryi	OAE2	3	37.54	-111.44	UT	Kane	Tropic Shale Fm.	3.44	-5	108	229.7	1	0.6437 ± 0.0013	42.0 ± 0.5	3	+0.36 ± 0.77	Bad	Nu	disqualified based on SEM
D12471-PycnewB	P. newberryi	OAE2	3	37.54	-111.44	UT	Kane	Tropic Shale Fm.	6.9	-2.59	19.1	21.5	4	0.6724 ± 0.0184	31.8 ± 7.2	5	-1.07 ± 1.02	Good	MAT253	Primary Zone 3
D13917-PyckelA	P. kellumi	preOAE2	1	44.58	-108.16	WY	Big Horn	Frontier Fm.	2.15	-4.56	43.6	598.7	3	0.7087 ± 0.0154	19.0 ± 4.9	6	-3.68 ± 1.14	Bad	MAT253	disqualified based on trace elements
D13917-PyckelB	P. kellumi	preOAE2	1	44.58	-108.16	WY	Big Horn	Frontier Fm.	2.46	-4.42	37.8	149.1	2	-	-	-	-	-	-	Another powder from specimen analyzed
D13917-PyckelB-Nu	P. kellumi	preOAE2	1	44.58	-108.16	WY	Big Horn	Frontier Fm.	2.46	-4.42	55.6	275.2	2	0.6714 ± 0.0068	31.3 ± 2.5	3	-1.01 ± 0.74	Good	Nu	Primary Zone 1
NOTE: Criteria for passing diagenesis screening are 1) Mn contents < 200 ppm, 2) Fe contents < 400 ppm, 3) SEM preservation indexes ≥ 2.

## Sheet: Isotope Geochemistry
TABLE S1b. SAMPLE LEVEL ISOTOPE GEOCHEMICAL DATA FOR CENOMANIAN OYSTERS FROM WESTERN INTERIOR BASIN (U.S.)																					Recrystallization diagenesis screening (from Table S1c)				Traditional temperature calculation (assuming d18Ow of -1‰ VSMOW)
Sample Name	Taxa	Time Interval	Instrument	Geographic Zone	N	δ13Ccarb (‰VPDB)#	SE_δ13Ccarb	δ18Ocarb (‰VPDB)#	SE_δ18Ocarb	Δ47	SE Δ47 (internal)	SE Δ47 (external)	Δ47 temperature (˚C)*	SE_Temp (internal)	SE_Temp (external)	δ18Ow (‰VSMOW)**	SE_δ18Ow (maximum)	Temp (Anderson et al. 2021)	δ18Ow (Anderson et al. 2021)		Mn (ppm)	Fe (ppm)	SEM Ranking		δ18Ocarb (‰VSMOW)#	δ18O paleotemperature (Kim & O'Neil, 1997 eqns)	difference from clumped isotope temperature (TΔ47 - δ18O temp)
D8304-PycnspA-Nu	P. kellumi	preOAE2	Nu	1	3	1.48	0.02	-3.11	0.08	0.6875	0.009	0.00866	25.6	3.1	3	-0.62	0.706153	23.1042	-1.11209		16.8	180.3	3		27.7039	23.652	1.94796
D8304-PycnspB-Nu	P. kellumi	preOAE2	Nu	1	3	2.52	0.07	-3.24	0.11	0.6866	0.0052	0.00866	25.8	1.9	3	-0.7	0.715244	23.4039	-1.1809		6.9	37.8	3.5		27.5699	24.2906	1.50941
D8407-Pycnsp	P. kellumi	preOAE2	MAT253	1	3	2.27	0.04	-4.39	0.16	0.6668	0.0071	0.01443	33	2.6	5.4	-0.43	1.19932	30.2364	-0.966748		23.38	91.99	3		26.3843	30.0651	2.93493
D11792-PyckelA	P. kellumi	preOAE2	Nu	1	3	1.91	0.06	-5.71	0.09	0.6534	0.0103	0.00866	38.3	4.1	3.4	-0.78	0.851806	35.1377	-1.34739		87.38	55.04	3		25.0235	36.9846	1.31537
D13917-PyckelB-Nu	P. kellumi	preOAE2	Nu	1	3	2.49	0.04	-4.63	0.12	0.6714	0.0068	0.00866	31.3	2.5	3.2	-1.01	0.742626	28.607	-1.52763		55.6	275.2	2		26.1369	31.2994	0.000560184
D2052-Exo	Exogyra	preOAE2	MAT253	2	5	0.65	0.07	-4.93	0.03	0.6327	0.0038	0.01118	46.6	1.6	4.75	1.53	0.869386	43.1992	0.926531		99.8	168	3		25.8276	32.857	13.743
D5737-ExoA	Exogyra	preOAE2	MAT253	2	3	0.56	0.05	-5.07	0.12	0.6497	0.0188	0.01443	40.1	7.6	5.8	0.17	1.51797	36.5335	-0.441908		119.74	159.69	2		25.6833	33.5895	6.51047
D5737-ExoB	Exogyra	preOAE2	MAT253	2	5	0.7	0.04	-5.31	0.09	0.6721	0.0059	0.01118	31.1	2.2	4.15	-1.74	0.897605	28.3613	-2.2583		94.4	124.7	3		25.4359	34.8537	-3.75369
D6175-PycnewA-Nu	P. newberryi	OAE2	Nu	2	2	4.51	0.14	-3.91	0.21	0.6372	0.0121	0.01061	44.8	5	4.45	2.22	1.10527	41.3929	1.62415		71	150.2	3.5		26.8791	27.627	17.173
D6175-PycnewB-Nu	P. newberryi	OAE2	Nu	2	3	2.02	0.7	-4.72	0.25	0.6229	0.0096	0.00866	51	4.2	3.85	2.49	0.974702	47.2429	1.8577		55.7	57.3	3		26.0441	31.765	19.235
D11889-PycnewB	P. newberryi	OAE2	MAT253	2	4	1.12	0.67	-3.99	0.36	0.6408	0.0046	0.0125	43.2	1.9	5.2	1.87	1.30082	39.97	1.28331		48.33	125.9	3		26.7967	28.0305	15.1695
D4353-PycnewA-Nu	P. newberryi	OAE2	Nu	3	3	5.57	0.11	-3.72	0.17	0.6706	0.0102	0.00866	31.7	3.7	3.2	-0.03	0.888313	28.8885	-0.559265		27.6	170	3		27.075	26.673	5.02696
D4353-PycnewB-Nu	P. newberryi	OAE2	Nu	3	3	4.31	0.02	-3.84	0.04	0.6569	0.0063	0.00866	36.8	2.4	3.35	0.83	0.669765	33.8347	0.28168		27.7	52.3	2		26.9513	27.2748	9.52519
D9018-PycnewB-Nu	P. newberryi	OAE2	Nu	3	3	5.57	0.07	-3.33	0.17	0.6583	0.0059	0.00866	36.2	2.3	3.35	1.24	0.802547	33.318	0.694938		29.2	37.2	2		27.4771	24.7343	11.4657
D9020-PycnewA-Nu	P. newberryi	OAE2	Nu	3	3	4.23	0.01	-3.77	0.1	0.6782	0.0077	0.00866	28.8	2.7	3.1	-0.63	0.713427	26.2457	-1.13634		71.1	361.2	3.5		27.0235	26.9235	1.87652
D9020-PycnewB	P. newberryi	OAE2	MAT253	3	4	4.14	0.02	-4.13	0.12	0.6804	0.0089	0.0125	28.1	3.1	4.45	-1.14	1.00344	25.4935	-1.6486		74.87	129.66	3		26.6523	28.7394	-0.639418
D12471-PycnewB	P. newberryi	OAE2	MAT253	3	4	5.02	0.1337	-3.4715	0.15113	0.688842	0.0105279	0.0125	25.2	3.64	4.3	-1.074	1.02193	22.6588	-1.56612		19.09	21.46	4		27.3312	25.4347	-0.234738
																										average difference (°C):	3.15713
Insufficient number of good replicates measured on MAT253 from original powder (second set of powders from these samples measured on Nu Perspective - see above)
D6175-PycnewB	P. newberryi	OAE2	MAT253	2	2	2.671	0.1075	-5.306	0.061	0.63852	0.0257581	0.01768	44.65	10.75	7.35	0.745125	1.98421	40.8688	0.124843		148.02	118.27	3
D4353-PycnewB	P. newberryi	OAE2	MAT253	3	2	4.102	0.072	-3.971	0.167	0.645284	0.0320452	0.01768	42.15	13.05	7.2	1.61	2.54242	38.2242	0.97863		27.55	45.34	2
D8304-PycnspB	P. kellumi	preOAE2	MAT253	1	1	2.37	NA	-3.48	NA	0.745738	NA	0.025	7.1	NA	7.15	-4.956	0.715244	5.45305	-5.32608		12.91	22.33	3.5
D11792-PyckelA	P. kellumi	preOAE2	MAT253	1	1	1.957	NA	-5.728	NA	0.598366	NA	0.025	62.3	NA	12.35	3.37	NA	58.0881	2.68895		87.38	55.04	3
Insufficient number of good replicates
D5779-Pycnew	P. newberryi	OAE2	MAT253	2	1	5.6	NA	-4.49	NA	0.6514	NA	0.025	38.9	NA	9.95	0.59	NA	35.8898	0.0195947		87.56	103.17	3
Diagenetically altered (evidence from SEM and trace elements)
D5759-ExoB	Exogyra	preOAE2	MAT253	2	6	-0.85	0.07	-6.82	0.11	0.6552	0.0108	0.01021	37.8	4.2	3.95	-2.02	0.892416	34.4655	-2.59041		318.12	684.23	2
D6816-PycnewB-Nu	P. newberryi	OAE2	Nu	2	3	5.29	0.03	-10	0.04	0.5435	0.0107	0.00866	93.5	6.8	5.55	3.61	0.955954	86.9679	2.7485		56.8	499.4	2
D6899-OstC	Ostrea	preOAE2	MAT253	NA	4	0.29	0.11	-8.13	0.05	0.6687	0.0105	0.0125	32.5	3.8	4.65	-4.31	0.94393	29.5602	-4.85114		644.22	1409.23	3
D9018-PycnewA	P. newberryi	OAE2	MAT253	3	2	4.228	0.047	-4.133	0.103	0.693648	0.031375	0.01768	23.9	10.7	6.05	-2.05	2.28774	21.0809	-2.55503		165.99	672.41	2
D10440-PycnewA	P. newberryi	OAE2	MAT253	2	2	1.7225	0.0755	-4.3455	0.0105	0.619019	0.00536864	0.01768	52.6	2.4	7.95	3.159	1.36659	48.8875	2.52268		1078.4	1360.4	2
D11889-PycnewA	P. newberryi	OAE2	MAT253	2	3	0.07	0.09	-4.09	0.03	0.671	0.0688	0.01443	37.2	23.7	5.3	-0.03	4.49421	28.7477	-0.957837		399.7	1739.6	3
D13917-PyckelA	P. kellumi	preOAE2	MAT253	1	6	2.03	0.06	-4.73	0.11	0.7087	0.0154	0.01021	19	4.9	3.3	-3.68	1.14187	16.2973	-4.16157		43.55	598.7	3
Diagenetically altered (evidence from SEM)
D2402-PycnewA	P. newberryi	OAE2	Nu	2	3	4.74	0.03	-4.49	0.06	0.6348	0.0059	0.00866	45.7	2.5	3.65	1.81	0.709093	42.3524	1.21537		44.75	134.64	1.5
D7361-PycnewC	P. newberryi	OAE2	MAT253	2	1	3.6	NA	-4.77	NA	0.6353	NA	0.025	45.4	NA	10.6	1.49	NA	42.1518	0.898013		69.6	96.9	1
D12471-PycnewA-Nu	P. newberryi	OAE2	Nu	3	3	3.24	0.05	-5.27	0.12	0.6437	0.0013	0.00866	42	0.5	3.55	0.36	0.765727	38.8377	-0.212848		108	229.7	1
Diagenetically altered (evidence from SEM and trace elements) or contaminated
D5792-PycnewB	P. newberryi	OAE2	MAT253	2	1	3.48	NA	-4.71	NA	0.3352	NA	0.025	431.1	NA	122.2	33.07	NA	374.56	30.7677		241.64	483.84	1	previously measured replicates had high D48 values, typical of contaminants being present in specimens (see "bad" replicates in "MAT 253 Replicate Table" in red). Therefore, this D47 temperature measurement is most likely spurious.
Notes
*calibration following Petersen et al. (2019)
**δ18Ow values calculated from δ18Ocarb values and Δ47 temperatures measured on MAT253 for each replicate
N=number of replicate measurements on MAT 253
#Stable isotopes reported here were measured alongside D47 on Mat 253 and Nu Perspective
																														Showing 1 to 15 of 33 entries, 3 total columns

## Sheet: SpecimenInfo
TABLE S1c. - DETAILS ON LOCALITIES AND COLLECTION OF OYSTER SPECIMEN STUDIED FROM THE USGS MACROFOSSIL ARCHIVE
Locality/horizon	Taxa	Specimens collected	Time Interval	Lat.	Long.	State	County	Stratigraphic Unit	Stage	Site Description	Collectors	Date Collected	Fossil identification	Index Fossils	Notes	Literature
D2052	Exogyra	1 (A)	preOAE2	34.99	-107.81	NM	Cibola	Twowells Sandstone Member of Dakota Ss.	Cenomanian	Top of bluff E of Rt 117, 7.1 miles south of U.S. Highway 77 (float)	G. O. Bachman	1959-04-14	Exogyra sp. B.		from collector "Float from just above Tres Hermanos ss (3rd ss above base of Dakota)"
D2402	P. newberryi	2 (A,B)	OAE2	37.174	-108.87	CO	Montezuma	Mancos Shale Fm.	Cenomanian	Mound Section: Mariano Wash, north of The Mound ~¼mi. E of Mariano Corral in SW¼ sec. 24, T 33 1/2 N, R 19 W; ~8 mi. WSW of Towac	Irwin, McLaughlin, Cobban	1957-09-23	Pycnodonte newberryi	Sciponoceras gracile	the "Mound Section" location matches D2402, but these come from a different level. "Mancos shale, from 2 chalkylimestone about 30' above top of Dakota sandstone."
D4353	P. newberryi	2 (A,B)	OAE2	37.0728	-111.622	UT	Kane	Tropic Shale Fm.	Cenomanian	SW¼NE¼ sec. 18, T. 43 S., R. 3 E.; 25-50 yds N of Tropic Bench Rd	H. A. Waldrop	1963	Pycnodonte newberryi (Stanton)	Sciponoceras gracile, Actinocamax sp.	"Tropic Shale, from25-50 feet above base."
D5737	Exogyra	2 (A,B)	preOAE2	35.0139	-107.81	NM	Cibola	Mancos Shale Fm.	Cenomanian	La Ventana Ridge NW ¼, NE¼, sec. 17, T.9 N., R.9W.	Dane, Landis, Cobban	1967-04-23	Exogyra sp. B.		"Mancos Shale, from basal part of shale above Kms2." From Whitewater Arroyo Shale Tongue between Paguate Sandstone and Twowells Sandstone tongues (Cobban, 1977 p. 12)	Cobban, 1977
D5749	P. newberryi	2 (A,B)	OAE2	35.4474	-107.993	NM	McKinley	Mancos Shale Fm.	Cenomanian	S of Berryhill Ranch in the NE¼, NW¼, sec. 15, T.14 N., R. 11W.	Landis	1967-04-24	Gryphea n. sp		"Mancos Shale, about 10 ft above kmc sandstone"
D5759	Exogyra	2 (A,B)	preOAE2	35.5103	-108.166	NM	McKinley	Tres Hermanos Ss.	Cenomanian(?)	SW¼, SW¼, SE¼, sec. 24, T.15 N.,R.13 W.	Landis and Cobban	1967-04-26	Exogyra trigeri		"Mancos Shale, about 10 ft below Kms3"	Landis & Cobban, 1967; Cobban, 1977
D5779	P. newberryi	3 (A,B,C)	OAE2	33.8867	-106.751	NM	Socorro	Mancos Shale Fm.	Cenomanian	NE¼, SE¼, sec. 8, T. 5S., R. 2 E.	Dane, Landis, Cobban	1967-04-30	Pycnodonte newberryi (Gryphaea newberryi Stanton)		"The species seems to have been derived directly out of Pycnodonte n. sp. by decreasing in size and by becoming narrower and more convex."	Hook and Cobban, 2017
D5792	P. newberryi	2 (A,B)	OAE2	34.3936	-107.372	NM	Socorro	Mancos Shale Fm.	Cenomanian	2½ mi. W of Riley in SW¼, sec. 16 and NW¼, sec. 21, T. 2 N., R. 5 W.	W.A. Cobban	1967-05-02	Pycnodonte newberryi (Stanton)	M. mytiloides	"Mancos Shale, from 6-in. nodular bed of limestone at base of Greenhorn Limestone Member."
D6175	P. newberryi	2 (A,B)	OAE2	34.2929	-109.054	AZ	Apache	Twowells Sandstone	Cenomanian	Cottonwood Canyon in sec. 3, T. 10 N., R. 31 E., Old Cottonwood Creek location	W.A. Cobban	1967-09-19	Pycnodonte newberryi (Stanton)	Sciponoceras gracile	"Top 6 in. of Kms3 and 6 ft above top of the ammonite bed." Initially confused with Locality D7363	Hook and Cobban, 2016; Cobban and Kennedy, 1990
D6816	P. newberryi	2 (A,B)	OAE2	33.1221	-107.2	NM	Sierra	Mancos Shale Fm.	Cenomanian	West fork of Mescal Canyon ~1 mile ESE of Truth or Consequences	W.A. Cobban	1968-09-30	Pycnodonte newberryi		"Base of ridge-forming olive siltstone unit (36' thick) and 9' above upper of 3 Sciponoceras beds…"
D6899	Ostrea	3 (A,B,C)	preOAE2	32.8094	-97.0525	TX	Tarrant	Lewisville Member	Cenomanian	East side TX Hwy 360, 1.9 mi. due S of Great Southwest Airport; Loc 5 of GSA South-central sect. 1968 guidebook	J. R. Gill	1969-04-17	Ostrea leveretti	Calycoceras wintoni	"About 3 ft below top of Lewisville Mbr. of Woodbine Formation"
D7361	P. newberryi	3 (A,B,C)	OAE2	37.9203	-108.68	CO	San Miguel	Mancos Shale Fm.	Cenomanian	Close to road & old Westcott cemetery NW¼, sec. 7, T. 42 N., R. 16 W.	W.A. Cobban	1969-10-10	Pycnodonte newberryi (Stanton)		"Mancos Shale, from upper part of Pycnodonte newberryi zone."
D8304	P. kellumi	2 (A,B)	preOAE2	44.4464	-104.905	WY	Crook	Greenhorn Fm.	Cenomanian	West of Oil Butte in the SW1/4 NW1/4 sec. 34, T. 52 N., R. 67 W.	E.A. Merewether	1971	Pycnodonte n. sp	Pycnodonte aff. kellumi
D8407	P. kellumi	1 (A)	preOAE2	44.5837	-108.155	WY	Big Horn	Frontier Fm.	Cenomanian	NW¼, SE¼, sec. 10, T. 53 N., R. 94 W.	Merewether & Cobban	1972-07-12	Pycnodonte n. sp	Pycnodonte aff. kellumi
D9018	P. newberryi	2 (A,B)	OAE2	35.9637	-110.838	AZ	Coconino	Mancos Shale Fm.	Cenomanian	SW¼, NE¼, sec. 33, T. 30 N., R. 14 E.	Landis and Cobban	1970-10-09	Pycnodonte newberryi	Sciponoceras gracile	"Mancos shale, from small chalky limestone concretions about 8 ft above base."
D9020	P. newberryi	2 (A,B)	OAE2	36.1835	-109.883	AZ	Apache	Mancos Shale Fm.	Cenomanian	Lohali Pt. 4 miles north of Black Mtn. Trading Post	W.A. Cobban	1970-10-10	Pycnodonte newberryi		"Mancos Shale, from solt light-gray limestone concretions 24-1/2 ft above base"
D10440	P. newberryi	2 (A,B)	OAE2	39.2055	-108.867	CO	Mesa	Mancos Shale Fm.	Cenomanian	~1.5 mi. south of Mack NW1/4 NW1/4 sec. 31, T. 2 N., R. 3 W.	W.A. Cobban	1977	Pycnodonte newberryi (Stanton)		"from basal part of white - weathering calcareous shale unit about 50 - 59 ft. above Dakota Sandstone"	Merewether et al., 2006
D11792	P. kellumi	2 (A,B)	preOAE2	42.5282	-106.578	WY	Natrona	Frontier Fm.	Cenomanian	NW¼, NW¼, sec. 32, T. 30 N., R. 81 W.	W.A. Cobban	1976-09-13	Pycnodonte aff. P. kellumi (Jones)		"From soft 10 - foot sandstone overlying a dark - grey shale"
D11889	P. newberryi	2 (A,B)	OAE2	38.7	-107.9	CO	Delta	Mancos Shale Fm.	Cenomanian	SE¼, sec. 34, T. 15 S., R. 94 W.	Merewether & Cobban	1982-06-23	Pycnodonte newberryi (Stanton)		"Bridge Creek Limestone Mbr. From calcareous shale in Greenhorn Shale"	Merewether et al., 2006
D12471	P. newberryi	2 (A,B)	OAE2	37.5358	-111.44	UT	Kane	Tropic Shale Fm.	Cenomanian	North of unpaved rd in Left Hand Collet Cnyn, sec. 2, T. 38 S., R. 4 E.,	F.B. Zelt	1984	Pycnodonte newberryi (Stanton)		"Tropic Shale, from 1 m above base"
D13917	P. kellumi	2 (A,B)	preOAE2	44.58	-108.16	WY	Big Horn	Frontier Fm.	Cenomanian	NW¼ SW¼ SE¼ sec. 10, T. 53 N., R. 94 W.	E.A. Merewether	1998-08-20	Pycnodonte aff. P. kellumi (Jones)	Dunveganoceras conditum	"From 130 ft. above Torchlight Ss. Mbr."	Merewether et al., 2010 (pgs. 4, 34, 43)

## Sheet: ElementalChemistry
TABLE S1c. ELEMENTAL RATIOS AND CONTENTS OF CENOMANIAN OYSTERS FROM WESTERN INTERIOR BASIN (U.S.)
2019 analyses	Solid Contents		(ppm = ug/g)						Molar Ratios
	Na	Mg	K	Ca	Mn	Fe	Sr	Zn	Na/Ca	Mg/Ca	K/Ca	Mn/Ca	Fe/Ca	Sr/Ca	Zn/Ca
Sample Name	(ppm)	(ppm)	(ppm)	(ppm)	(ppm)	(ppm)	(ppm)	(ppm)	(mmol/mol)	(mmol/mol)	(µmol/mol)	(µmol/mol)	(µmol/mol)	(mmol/mol)	(µmol/mol)
D2052-Exo	980.192	917.831	BDL	377973	99.8322	167.996	815.96	BDL	4.52086	4.00417	BDL	192.683	318.978	0.98744	BDL
D2402-PycnewA	589.573	1370.77	BDL	385951	44.7516	134.642	754.866	BDL	2.66303	5.85655	BDL	84.5882	250.364	0.894624	BDL
D2402-PycnewB	787.322	1430.75	2.19734	368676	314.195	1975.55	695.285	0.316388	3.72288	6.39927	6.10942	621.709	3845.6	0.862622	0.526061
D4353-PycnewA	1263.52	1463	17.8546	388247	58.8304	181.322	880.618	BDL	5.67339	6.21363	47.1401	110.542	335.17	1.03749	BDL
D4353-PycnewB	1239.13	1222.74	10.0447	381187	27.5529	45.3437	829.272	BDL	5.66694	5.2894	27.0115	52.7306	85.3691	0.995089	BDL
D5737-ExoA	1110.9	1150.19	BDL	393179	119.741	159.695	863.292	BDL	4.92554	4.8238	BDL	222.171	291.489	1.00431	BDL
D5737-ExoB	1229.42	860.184	BDL	411581	94.4203	124.733	916.538	BDL	5.20733	3.44625	BDL	167.357	217.494	1.01859	BDL
D5749-gryA	1002.5	1309.84	BDL	396828	66.6582	85.8536	852.523	0.427169	4.40405	5.44285	BDL	122.542	155.267	0.982668	0.65987
D5749-gryB	919.388	1157.43	3.85456	361561	96.5504	123.099	758.765	BDL	4.4329	5.27865	10.928	194.807	244.339	0.959905	BDL
D5759-ExoA	1216.98	969.182	BDL	364565	277.596	610.911	764.691	103.951	5.81942	4.3837	BDL	555.485	1202.61	0.959432	174.789
D5759-ExoB	758.318	1336.77	BDL	376737	318.119	684.231	851.255	26.1164	3.50901	5.85099	BDL	616.005	1303.43	1.03353	42.4949
D5779-PycnewA	1252.94	1597.18	6.30555	353040	87.5631	103.166	757.187	BDL	6.18693	7.46	18.3083	180.938	209.717	0.981028	BDL
D5779-PycnewB	709.034	1316.78	BDL	366235	315.384	444.342	810.218	BDL	3.37503	5.92876	BDL	628.222	870.721	1.01192	BDL
D5779-PycnewC	811.974	1371.59	12.0168	381872	87.8948	118.996	844.112	BDL	3.70676	5.92267	32.2567	167.911	223.632	1.01108	BDL
D5792-PycnewA	325	1575.66	0.666475	393559	202.334	121.967	728.146	BDL	1.43961	6.6018	1.73589	375.052	222.41	0.846274	BDL
D5792-PycnewB	254.582	1450.25	BDL	371000	241.637	483.837	668.302	70.2103	1.19626	6.44586	BDL	475.142	935.937	0.823951	116.008
D6175-PycnewA	746.309	1346.37	39.5491	408073	84.3299	140.881	744.071	BDL	3.18825	5.44047	99.3452	150.757	247.762	0.834026	BDL
D6175-PycnewB	621.532	1252.75	0.460211	387633	148.016	118.274	733.397	BDL	2.7952	5.32911	1.21698	278.561	218.973	0.865408	BDL
D6816-PycnewA	364.308	916.482	BDL	415220	59.4924	520.247	535.92	1.94666	1.52954	3.63962	BDL	104.524	899.192	0.590369	2.8739
D6816-PycnewB	621.533	1461.1	2.52713	383383	64.0248	382.783	784.678	0.0513691	2.8262	6.28432	6.75684	121.828	716.542	0.936185	0.0821354
D6899-OstA	645.106	577.393	BDL	343009	404.979	1591.5	1048.01	0.688709	3.27866	2.77572	BDL	861.31	3329.84	1.39754	1.23081
D6899-OstB	1223.37	541.833	BDL	360910	485.499	829.047	1240.93	0.877923	5.90924	2.47558	BDL	981.348	1648.55	1.57272	1.49114
D6899-OstC	1257.97	595.599	BDL	366405	644.222	1409.23	1317.48	1.02546	5.98522	2.68042	BDL	1282.65	2760.2	1.64469	1.71562
D7361-PycnewA	724.497	1198.53	BDL	380105	326.21	583.427	732.792	39.2483	3.32279	5.19941	BDL	626.074	1101.55	0.881819	63.2963
D7361-PycnewB	1148.57	1276.57	BDL	378365	43.3592	84.9454	752.842	BDL	5.29198	5.56347	BDL	83.5994	161.12	0.910113	BDL
D7631-PycnewC	608.254	1109.47	15.4358	392200	69.6177	96.8983	696.1	1.26462	2.70364	4.66466	40.3432	129.493	177.309	0.811833	1.97657
D8304-PyckelA	671.434	1288.98	BDL	399841	37.608	156.142	796.519	1.4699	2.92743	5.31579	BDL	68.616	280.254	0.911195	2.25351
D8304-PyckelB	595.776	885.366	BDL	389611	12.913	22.3275	745.405	BDL	2.66577	3.74716	BDL	24.1784	41.1274	0.875113	BDL
D8407-Pyckel	677.926	1024.43	BDL	404414	23.3788	91.9852	774.86	BDL	2.92231	4.17704	BDL	42.1725	163.235	0.876394	BDL
D9018-PycnewA-1	1153.94	1256.02	5.24825	373539	55.3139	67.4136	1821.62	0.612888	5.38541	5.54459	14.4021	108.027	129.519	2.23061	1.00579
D9018-PycnewA-2	1021.59	1428.81	1.10393	357831	165.987	672.413	750.05	1.26441	4.97701	6.58426	3.16238	338.399	1348.59	0.958771	2.16606
D9018-PycnewB	948.618	1456.72	23.0049	380623	33.7704	23.444	865.363	BDL	4.34478	6.31089	61.9545	64.7254	44.2037	1.03994	BDL
D9020-PycnewA	593.174	2072.52	26.5657	379349	102.036	137.809	872.675	BDL	2.72593	9.0089	71.7845	196.223	260.713	1.05225	BDL
D9020-PycnewB	877.358	1657.91	74.0104	379880	74.8663	129.662	809.023	0.665942	4.02625	7.19657	199.707	143.772	244.956	0.97413	1.07461
D10440-PycnewA	1057.27	1590.66	3.014	402545	1078.36	1360.38	803.291	0.365616	4.57868	6.51586	7.67497	1954.26	2425.3	0.912769	0.556765
D10440-PycnewB	1036.46	1223.54	BDL	403668	573.573	848.055	775.322	0.509231	4.47611	4.99809	BDL	1036.57	1507.72	0.878538	0.773307
D11792-PyckelA	1007.95	1419.37	BDL	385179	87.3842	55.0434	984.875	BDL	4.56193	6.07634	BDL	165.502	102.557	1.16956	BDL
D11792-PyckelB	1286.66	1884.16	108.183	516172	399.302	194.408	1194.29	19.2796	4.3455	6.01915	214.839	564.339	270.297	1.05832	22.8963
D11889-PycnewA	1165.29	1841.96	BDL	382713	399.741	1739.57	802.888	0.394792	5.30801	7.93628	BDL	761.971	3262.05	0.959588	0.632349
D11889-PycnewB	674.293	1195.26	2.6236	382714	48.3334	125.902	795.659	0.280376	3.07146	5.1499	7.02702	92.1311	236.092	0.950945	0.449083
D12471-PycnewA	746.327	1725.97	23.6153	392779	141.084	282.534	925.913	BDL	3.31247	7.24595	61.63	262.036	516.23	1.07826	BDL
D12471-PycnewB	1149.18	1212.26	1.75158	372446	19.0914	21.4586	790.169	BDL	5.37891	5.36713	4.82074	37.3945	41.3485	0.97042	BDL
D13917-PyckelA	589.303	1327.03	BDL	375637	43.5468	598.7	733.897	BDL	2.7349	5.82535	BDL	84.5711	1143.83	0.893655	BDL
D13917-PyckelB	739.052	1059.99	0.713601	392169	37.8381	149.103	798.249	BDL	3.28528	4.45697	1.86522	70.3866	272.858	0.931039	BDL
Note: BDL = Below Detection Limit; Si and S are BDL for all samples; K is close to BDL due to mass spectrometric interferences
Analyzed on Thermo Scientific iCAP Q ICP-MS; sample matrix 2% HNO3; KED Mode (He gas); date of analysis Nov. 11, 2019
2021 analyses	Solid Contents		(ppm = ug/g)						Molar Ratios
	Na	Mg	K	Ca	Mn	Fe	Sr	Ba	Na/Ca	Mg/Ca	K/Ca	Mn/Ca	Fe/Ca	Sr/Ca	Ba/Ca
Sample Name	(ppm)	(ppm)	(ppm)	(ppm)	(ppm)	(ppm)	(ppm)	(ppm)	(mmol/mol)	(mmol/mol)	(µmol/mol)	(µmol/mol)	(µmol/mol)	(mmol/mol)	(µmol/mol)
D4353A-NU	826.307	1765.73	2.16318	461382	27.6131	169.997	992.609	5.73283	3.12214	6.31064	4.80597	43.6604	264.425	0.984058	3.62626
D4353B-NU	771.518	1380.42	9.89787	446188	27.6721	52.3347	917.674	6.65914	3.01439	5.10156	22.739	45.2435	84.177	0.940748	4.35562
D6175A-NU	671.118	1661.07	5.12054	496837	71.0015	150.197	970.168	3.60096	2.35481	5.51295	10.5645	104.253	216.955	0.893175	2.11521
D6175B-NU	582.476	1465.41	4.9871	460087	55.7445	57.3483	876.223	1.50409	2.20703	5.25207	11.1111	88.3884	89.4544	0.871119	0.954076
D6816B-NU	526.372	1725.47	60.5461	465143	56.7889	499.447	969.555	166.635	1.97277	6.1169	133.428	89.0655	770.592	0.953429	104.551
D8304ANU	542.431	1276.15	BDL	458215	16.8373	180.322	896.913	20.8641	2.0637	4.59243	BDL	26.8062	282.424	0.895332	13.2886
D8304B-NU	571.773	1273.4	BDL	515241	6.89962	37.7644	983.868	22.9711	1.93457	4.07535	BDL	9.76896	52.601	0.873432	13.0113
D9018B-NU	655.254	1790.87	BDL	464277	29.1503	37.2203	1022.75	17.9134	2.46038	6.36057	BDL	45.8035	57.534	1.00761	11.2603
D9020A-NU	713.819	1935.88	97.1149	482839	71.1303	361.193	993.545	19.9758	2.57725	6.6113	206.173	107.47	536.858	0.941213	12.074
D12471A-NU	652.761	1909.46	BDL	498835	108.034	229.678	1064.71	4.94831	2.28122	6.31195	BDL	157.993	330.433	0.976284	2.89501
D13917B-NU	769.343	1331.05	22.5053	481425	55.5838	275.189	993.408	11.9177	2.78588	4.55907	47.9186	84.2273	410.227	0.943848	7.22459
Note: BDL = Below Detection Limit; K is close to BDL for most samples in this round. These same powders were analyzed for Δ47 geochemistry on a Nu Carb/Nu Perspective. Weighing precision on scale was less precise for this round of analysis, thus concentrations may be biased higher based on Ca concentrations.
Analyzed on Thermo Scientific iCAP Q ICP-MS; sample matrix 2% HNO3; KED Mode (He gas); date of analysis March 26, 2021
For ratio calculations	Molar masses (g/mol)
Na	22.9898
Mg	24.305
K	39.0983
Ca	40.078
Mn	54.938
Fe	55.845
Sr	87.62
Zn	65.38
Ba	137.327
	X/Ca molar ratio (mmol/mol) = 1000*(Xconc/Caconc)*(Camolar mass/Xmolar mass)

## Sheet: MAT D47 Replicate Level Data
TABLE S1e. REPLICATE LEVEL MAT 253 DATA
MeasSess	Day	Date	Time	SampleName	Taxa	SmpID	BRd13C	BRse13	BRd18O_gas	BRse18	d18O_carb	d45	d46	d47	d48	d49	BRD47	BRse47	BRD48	BRseD48	BRD49	Bad	window	StartOrderDay1	EndOrderDay2	BRSlopeEGL	SlopeETF_BRP	IntETF_BRP	BRD47rfac_P	Temperature (Petersen et al 2019 calibration, Brand parameters)	Notes
X2015-09-Sept	4	2015-09-12	10:52:49	D11889-PycnewB	P. newberryi	S	1.78893	0.00603651	35.2476	0.0111018	-3.883	5.14676	0.269852	5.22445	4.56972	11.8985	-0.350549	0.00893426	4.02781	NA	5.84411	0	2	3	7	0.0193896	1.0447	1.04355	0.643507	42
X2015-09-Sept	6	2015-09-14	10:29:51	D5737-ExoB	Exogyra	S	0.85937	0.00536878	34.0963	0.0149083	-4.991	4.23647	-0.843436	3.15484	-3.12875	12.3632	-0.38194	0.00979633	-1.445	NA	9.48476	0	2	3	7	0.0193896	1.0447	1.04355	0.652635	38.4
X2015-09-Sept	7	2015-09-15	15:02:22	D5737-ExoB	Exogyra	S	0.695218	0.00528567	33.7757	0.0158349	-5.299	4.07178	-1.15318	2.69887	-2.5005	12.557	-0.362553	0.011935	-0.195886	NA	10.4699	0	2	3	7	0.0193896	1.0447	1.04355	0.682125	27.4
X2015-09-Sept	7	2015-09-15	18:55:40	D5737-ExoB	Exogyra	S	0.688485	0.00524928	33.7068	0.0185242	-5.365	4.06316	-1.21971	2.61147	-2.53906	13.439	-0.375376	0.0103122	-0.10136	NA	11.4917	0	2	3	7	0.0193896	1.0447	1.04355	0.670499	31.6
X2015-09-Sept	21	2015-09-29	20:41:30	D5737-ExoB	Exogyra	S	0.662227	0.00840486	33.5971	0.0176084	-5.471	4.03485	-1.3257	2.4888	-4.54945	12.8047	-0.364303	0.00857305	-1.90481	NA	11.0999	0	4	14	21	0.0223676	1.03557	1.0492	0.686293	25.9
X2015-12-Dec	2	2015-12-01	20:14:01	D5737-ExoA	Exogyra	S	0.510048	0.00509826	33.779	0.0128652	-5.296	3.89825	-1.15039	2.57748	-4.0316	11.4988	-0.308098	0.0118535	-1.73611	NA	9.59425	0	1	1	13	0.0162027	1.06018	0.979908	0.680992	27.8
X2015-12-Dec	3	2015-12-02	10:28:49	D5737-ExoA	Exogyra	S	0.513292	0.00523709	34.2078	0.0217501	-4.883	3.91568	-0.736555	2.94823	-2.77187	10.6414	-0.363512	0.0106941	-1.3012	NA	7.89908	0	1	1	13	0.0162027	1.06018	0.979908	0.615875	54
X2015-12-Dec	3	2015-12-02	15:59:28	D5737-ExoA	Exogyra	S	0.648166	0.00528791	34.0672	0.0298981	-5.019	4.03744	-0.871967	2.97486	-2.55301	10.6176	-0.32884	0.00916743	-0.811257	NA	8.01354	0	1	1	13	0.0162027	1.06018	0.979908	0.652175	38.6
X2015-12-Dec	6	2015-12-05	14:25:56	D2052-Exo	Exogyra	S	0.511082	0.00500781	34.1265	0.0181146	-4.962	3.91088	-0.815	2.89006	-1.37582	7.70457	-0.339408	0.0112194	0.253955	NA	5.13039	0	1	1	13	0.0162027	1.06018	0.979908	0.642429	42.5
X2015-12-Dec	6	2015-12-05	16:41:23	D6899-OstC	Ostrea	S	0.0394042	0.00544905	30.9826	0.0118686	-7.987	3.36304	-3.85064	-0.696147	11.6942	9.97765	-0.366942	0.0111022	19.5308	NA	14.029	0	1	1	13	0.0162027	1.06018	0.979908	0.67484	30
X2015-12-Dec	7	2015-12-06	18:31:14	D2052-Exo	Exogyra	S	0.601165	0.00618898	34.2252	0.0128572	-4.867	3.99866	-0.71959	3.06625	-0.216453	7.27641	-0.347814	0.0092009	1.224	NA	4.42124	0	1	1	13	0.0162027	1.06018	0.979908	0.630489	47.5
X2015-12-Dec	7	2015-12-06	22:20:02	D6899-OstC	Ostrea	S	0.588426	0.00581131	30.8599	0.00943993	-8.105	3.87375	-3.96794	-0.302003	7.78582	11.0403	-0.381744	0.0105	15.8314	NA	14.7806	0	1	1	13	0.0162027	1.06018	0.979908	0.652376	38.5
X2016-02-Feb	2	2016-02-23	23:44:43	D11889-PycnewB	P. newberryi	S	-0.902645	0.00473208	34.0597	0.0129256	-5.026	2.58294	-0.882425	1.39928	-2.75171	9.93464	-0.39511	0.00835431	-0.989364	NA	8.91045	0	1	1	2	0.016384	1.09065	1.01359	0.62966	47.9
X2016-02-Feb	3	2016-02-24	08:57:11	D2052-Exo	Exogyra	S	0.527334	0.00591468	34.1187	0.0193541	-4.969	3.92586	-0.822478	2.88868	-3.01543	8.0456	-0.348809	0.0101892	-1.37339	NA	5.46932	0	2	3	12	0.0179303	1.05093	0.989721	0.640714	43.2
X2016-02-Feb	3	2016-02-24	18:51:37	D2052-Exo	Exogyra	S	0.771052	0.00631723	34.0842	0.0241877	-5.002	4.15324	-0.855287	3.08135	-2.6393	10.7508	-0.358055	0.0101193	-0.931039	NA	7.98934	0	2	3	12	0.0179303	1.05093	0.989721	0.627366	48.9
X2016-02-Feb	3	2016-02-24	07:07:43	D6899-OstC	Ostrea	S	0.294097	0.00552004	30.7349	0.0235445	-8.225	3.59355	-4.0892	-0.73091	-7.84307	10.3575	-0.403193	0.0113851	0.321245	NA	14.6397	0	2	3	12	0.0179303	1.05093	0.989721	0.651766	38.7
X2016-02-Feb	6	2016-02-27	11:07:07	D11889-PycnewB	P. newberryi	S	1.80133	0.00626513	35.6524	0.0180139	-3.493	5.17196	0.660608	5.68628	1.05042	9.06232	-0.301117	0.0114313	-0.270846	NA	2.2285	0	2	3	12	0.0179303	1.05093	0.989721	0.638119	44.3
X2016-02-Feb	7	2016-02-28	07:08:55	D2052-Exo	Exogyra	S	0.856184	0.00504186	34.2368	0.0222408	-4.856	4.23819	-0.707837	3.31414	-2.16503	9.22366	-0.358367	0.00965322	-0.750904	NA	6.08392	0	2	3	12	0.0179303	1.05093	0.989721	0.622652	50.9
X2016-02-Feb	7	2016-02-28	10:55:20	D11889-PycnewA	P. newberryi	S	-0.0575619	0.00529917	35.0188	0.0181429	-4.103	3.40757	0.0450683	3.37803	-0.633933	0.823119	-0.181591	0.00819178	-0.72399	NA	-2.8872	0	2	3	12	0.0179303	1.05093	0.989721	0.807227	-9.1
X2016-02-Feb	8	2016-02-29	16:50:23	D13917-PyckelA	P. kellumi	S	2.05557	0.00623803	34.3012	0.0224228	-4.794	5.36506	-0.643097	4.6366	-2.72077	8.25151	-0.261766	0.0104188	-1.43681	NA	3.78661	0	2	3	12	0.0179303	1.05093	0.989721	0.699254	21.5
X2016-02-Feb	8	2016-02-29	20:29:54	D8407-Pycnsp	P. kellumi	S	2.3322	0.0049471	34.6402	0.0249772	-4.467	5.63584	-0.315322	5.21147	-1.99388	8.64778	-0.289923	0.0114063	-1.36418	NA	3.24631	0	2	3	12	0.0179303	1.05093	0.989721	0.65883	36
X2016-02-Feb	9	2016-03-01	17:25:12	D11889-PycnewA	P. newberryi	S	0.00746206	0.00557894	34.9789	0.0165069	-4.142	3.4672	0.00666131	3.18691	0.28623	9.4862	-0.395577	0.0112705	0.272918	NA	5.75598	0	2	3	12	0.0179303	1.05093	0.989721	0.585944	68.6
X2016-02-Feb	9	2016-03-01	21:18:34	D11889-PycnewB	P. newberryi	S	1.79449	0.00469002	35.5868	0.0157996	-3.557	5.16335	0.597251	5.62676	1.55387	8.34696	-0.289215	0.00915266	0.358611	NA	1.6518	0	2	3	12	0.0179303	1.05093	0.989721	0.651749	38.7
X2016-02-Feb	9	2016-03-01	14:54:31	D5759-ExoB	Exogyra	S	-1.11972	0.00573208	31.9698	0.0165477	-7.037	2.30924	-2.90021	-0.896715	-7.54026	9.17134	-0.421254	0.0102309	-1.75842	NA	12.4554	0	2	3	12	0.0179303	1.05093	0.989721	0.63591	45.2
X2016-02-Feb	9	2016-03-01	19:27:01	D8407-Pycnsp	P. nsp.	S	2.19172	0.00556909	34.491	0.0186937	-4.611	5.4991	-0.45967	4.94415	-2.34851	7.89545	-0.273649	0.0110449	-1.43067	NA	2.92784	0	2	3	12	0.0179303	1.05093	0.989721	0.68097	27.8
X2016-02-Feb	11	2016-03-03	11:32:23	D11889-PycnewA	P. newberryi	S	0.24986	0.0055948	35.0978	0.0149082	-4.027	3.69849	0.121946	3.57856	-0.406214	8.97986	-0.356366	0.0106053	-0.64994	NA	4.77702	0	2	3	12	0.0179303	1.05093	0.989721	0.619773	52.2
X2016-02-Feb	11	2016-03-03	07:10:22	D13917-PyckelA	P. kellumi	S	2.19218	0.00542765	34.6255	0.0142031	-4.481	5.50404	-0.329774	5.07699	-1.8671	8.55659	-0.274309	0.0116344	-1.20842	NA	3.32424	0	2	3	12	0.0179303	1.05093	0.989721	0.677773	28.9
X2016-02-Feb	11	2016-03-03	13:28:07	D5759-ExoB	Exogyra	S	-0.729367	0.00615355	32.5195	0.0158206	-6.508	2.69374	-2.36879	0.0504917	-5.97055	7.78998	-0.393194	0.0111745	-1.24446	NA	9.59877	0	2	3	12	0.0179303	1.05093	0.989721	0.647551	40.4
X2016-02-Feb	11	2016-03-03	09:03:13	D8407-Pycnsp	P. kellumi	S	2.29185	0.0063295	35.0366	0.0155989	-4.086	5.61129	0.0672054	5.57248	-0.759526	8.28636	-0.281834	0.011798	-0.893781	NA	2.15917	0	2	3	12	0.0179303	1.05093	0.989721	0.660528	35.3
X2016-02-Feb	12	2016-03-04	11:00:45	D13917-PyckelA	P. kellumi	S	2.22677	0.00527795	34.7327	0.0141212	-4.378	5.54007	-0.226309	5.24477	-1.22238	6.28271	-0.246118	0.0131867	-0.770122	NA	0.820332	0	2	3	12	0.0179303	1.05093	0.989721	0.704238	19.8
X2016-02-Feb	12	2016-03-04	09:02:36	D5759-ExoB	Exogyra	S	-0.655319	0.00572687	32.5776	0.0148463	-6.452	2.76513	-2.31255	0.189865	-3.03558	6.51102	-0.38271	0.0104888	1.59154	NA	8.12937	0	2	3	12	0.0179303	1.05093	0.989721	0.655942	37.1
2019-1	7	2019-04-11	18:03:00	D12471-PycnewB	P. newberryi	MMJ	5.181	0.005	35.906	0.011	-3.249	8.349	0.912	9.342	3.345	-2.833	-0.175	0.011	1.518	0.09	-13.398	0	1	1	27	0.0250016	0.986339	1.04301	0.712027	17.3
2019-1	8	2019-04-12	09:42:00	D9020-Pycnew	P. newberryi	MMJ	4.116	0.006	34.731	0.01	-4.38	7.312	-0.224	7.081	2.055	-2.88	-0.239	0.011	2.505	0.131	-10.154	0	1	1	27	0.0250016	0.986339	1.04301	0.704658	19.7
2019-2	3	2019-05-16	09:50:00	D9020-Pycnew	P. newberryi	MMJ	4.181	0.005	34.98	0.013	-4.14	7.381	0.017	7.28	-0.569	4.113	-0.35	0.01	-0.603	0.061	-3.759	0	2	28	128	0.0236357	1.01639	1.12042	0.661789	34.8
2019-2	10	2019-05-23	12:11:00	D5759-ExoB	Exogyra	MMJ	-0.741	0.005	32.139	0.012	-6.874	2.67	-2.736	-0.445	-7.612	3.811	-0.502	0.009	-2.158	0.062	6.367	0	2	28	128	0.0236357	1.01639	1.12042	0.692877	23.6
2019-2	10	2019-05-23	14:11:00	D7361-PycnewC	P. newberryi	MMJ	3.595	0.005	34.331	0.009	-4.765	6.81	-0.611	6.012	-1.701	3.876	-0.406	0.01	-0.48	0.059	-2.161	0	2	28	128	0.0236357	1.01639	1.12042	0.635333	45.4
2019-2	28	2019-06-10	15:28:00	D5759-ExoB	Exogyra	MMJ	-0.863	0.006	32.097	0.009	-6.914	2.554	-2.777	-0.681	-5.725	2.036	-0.578	0.01	-0.179	0.077	4.792	0	2	28	128	0.0236357	1.01639	1.12042	0.6213	51.5
2019-2	29	2019-06-11	10:27:00	D6175-PycnewB	P. newberryi	MMJ	2.564	0.007	33.705	0.012	-5.367	5.821	-1.218	4.384	-3.211	3.007	-0.416	0.012	-0.779	0.085	-0.788	0	2	28	128	0.0236357	1.01639	1.12042	0.664279	33.9
2019-2	29	2019-06-11	14:43:00	D12471-PycnewB	P. newberryi	MMJ	5.161	0.007	35.755	0.012	-3.395	8.325	0.766	9.053	0.864	4.578	-0.294	0.01	-0.668	0.065	-5.756	0	2	28	128	0.0236357	1.01639	1.12042	0.676114	29.5
2019-2	30	2019-06-12	13:46:00	D9020-Pycnew	P. newberryi	MMJ	4.137	0.005	34.957	0.011	-4.163	7.339	-0.006	7.227	-1.197	5.16	-0.337	0.012	-1.186	0.073	-2.63	0	2	28	128	0.0236357	1.01639	1.12042	0.676276	29.4
2019-2	31	2019-06-13	14:46:00	D5759-ExoB	Exogyra	MMJ	-0.963	0.006	31.858	0.012	-7.144	2.453	-3.008	-0.963	-8.146	2.751	-0.529	0.008	-2.153	0.079	6.074	0	2	28	128	0.0236357	1.01639	1.12042	0.677878	28.9
2019-2	36	2019-06-18	09:35:00	D9020-Pycnew	P. newberryi	MMJ	4.115	0.005	35.316	0.013	-3.817	7.33	0.341	7.55	0.369	2.543	-0.348	0.012	-0.313	0.082	-5.896	0	3	129	167	0.0259625	1.02473	1.16446	0.678992	28.5
2019-2	36	2019-06-18	13:30:00	D12471-PycnewB	P. newberryi	MMJ	5.117	0.005	35.826	0.009	-3.326	8.287	0.835	9.088	1.374	4.382	-0.287	0.01	-0.295	0.067	-6.043	0	3	129	167	0.0259625	1.02473	1.16446	0.700582	21
2019-2	36	2019-06-18	17:44:00	D13917-PyckelA	P. kellumi	MMJ	1.904	0.005	34.101	0.011	-4.986	5.217	-0.837	4.174	-2.983	1.202	-0.38	0.01	-1.312	0.066	-2.695	0	3	129	167	0.0259625	1.02473	1.16446	0.736017	9.9
2019-2	37	2019-06-19	11:44:00	D6899-OstC	Ostrea	MMJ	0.254	0.006	30.757	0.011	-8.204	3.557	-4.068	-0.896	-8.785	4.501	-0.551	0.011	-0.671	0.073	8.755	0	3	129	167	0.0259625	1.02473	1.16446	0.695673	22.7
2019-2	44	2019-06-26	14:44:00	D12471-PycnewB	P. newberryi	MMJ	4.621	0.007	35.213	0.015	-3.916	7.801	0.243	7.937	-0.422	5.156	-0.35	0.011	-0.907	0.077	-3.609	0	3	129	167	0.0259625	1.02473	1.16446	0.666646	33
2019-2	44	2019-06-26	16:50:00	D13917-PyckelA	P. kellumi	MMJ	1.965	0.006	34.35	0.011	-4.747	5.281	-0.596	4.416	-2.618	5.388	-0.441	0.01	-1.428	0.071	0.932	0	3	129	167	0.0259625	1.02473	1.16446	0.66707	32.8
2019-2	45	2019-06-27	11:41:00	D6175-PycnewB	P. newberryi	MMJ	2.779	0.006	33.832	0.01	-5.245	6.028	-1.094	4.647	-2.943	4.204	-0.488	0.009	-0.758	0.069	-0.058	0	3	129	167	0.0259625	1.02473	1.16446	0.612762	55.4
2019-3	5	2019-08-02	14:10:00	D13917-PyckelA	P. kellumi	MMJ	1.857	0.005	34.075	0.01	-5.011	5.171	-0.862	4.354	-2.194	-1.358	-0.128	0.011	-0.472	0.061	-5.147	0	4	168	197	0.0243279	1.02335	0.935498	0.768112	0.9
2019-3	9	2019-08-07	13:45:00	D5737-ExoB	Exogyra	MMJ	0.592	0.007	33.628	0.011	-5.441	3.97	-1.296	2.547	-3.091	-3.732	-0.269	0.011	-0.502	0.086	-5.399	0	4	168	197	0.0243279	1.02335	0.935498	0.668806	32.2
2019-3	9	2019-08-07	17:54:00	D5779-Pycnew	P. newberryi	MMJ	5.6	0.006	34.619	0.011	-4.488	8.7	-0.329	8.508	-0.465	-3.469	-0.141	0.008	0.192	0.046	-11.987	0	4	168	197	0.0243279	1.02335	0.935498	0.65139	38.9
2019-3	10	2019-08-08	14:06:00	D12471-PycnewB	P. newberryi	MMJ	5.178	0.008	35.879	0.015	-3.275	8.346	0.887	9.325	2.457	-2.342	-0.165	0.01	0.681	0.062	-12.861	0	4	168	197	0.0243279	1.02335	0.935498	0.60649	58.4
2019-3	31	2019-08-29	17:45:00	D10440-PycnewA	P. newberryi	MMJ	1.647	0.008	34.778	0.015	-4.335	4.998	-0.184	4.57	-0.683	2.779	-0.403	0.008	-0.315	0.059	-2.175	0	6	237	304	0.0235951	0.999134	1.06277	0.624383	50.2
2019-3	32	2019-08-30	12:28:00	D9018-PycnewA	P. newberryi	MMJ	4.181	0.006	34.881	0.013	-4.236	7.378	-0.079	7.294	-0.378	1.816	-0.238	0.009	-0.22	0.074	-5.847	0	6	237	304	0.0235951	0.999134	1.06277	0.725023	13.2
2019-3	32	2019-08-30	14:44:00	D4353-PycnewB	P. newberryi	MMJ	4.03	0.009	34.983	0.017	-4.138	7.239	0.019	7.198	0.03	1.033	-0.288	0.011	-0.008	0.075	-6.669	0	6	237	304	0.0235951	0.999134	1.06277	0.67733	29.1
2019-3	32	2019-08-30	19:52:00	D5792-PycnewB	P. newberryi	MMJ	3.476	0.007	34.386	0.015	-4.712	6.7	-0.559	5.689	-1.744	4.342	-0.666	0.008	-0.627	0.062	-1.683	0	6	237	304	0.0235951	0.999134	1.06277	0.335231	431.1	previously measured replicates had high D48 values, typical of contaminants being present in specimens (see "bad" replicates below in red). Therefore, this D47 temperature measurement is most likely spurious.
2019-3	37	2019-09-04	16:05:00	D9018-PycnewA	P. newberryi	MMJ	4.275	0.007	35.095	0.012	-4.03	7.473	0.127	7.54	0.028	2.429	-0.295	0.011	-0.227	0.064	-5.742	0	6	237	304	0.0235951	0.999134	1.06277	0.662273	34.6
2019-3	37	2019-09-04	18:10:00	D10440-PycnewA	P. newberryi	MMJ	1.798	0.012	34.756	0.022	-4.356	5.138	-0.205	4.686	-0.65	4.33	-0.411	0.009	-0.241	0.051	-0.739	0	6	237	304	0.0235951	0.999134	1.06277	0.613656	55
2019-3	43	2019-09-10	16:36:00	D4353-PycnewB	P. newberryi	MMJ	4.174	0.008	35.33	0.016	-3.804	7.386	0.354	7.628	0.981	2.709	-0.342	0.01	0.273	0.055	-5.816	0	6	237	304	0.0235951	0.999134	1.06277	0.613239	55.2
2019-3	46	2019-09-13	16:50:00	D11792-PyckelA	P. kellumi	MMJ	1.957	0.006	33.33	0.01	-5.728	5.24	-1.581	3.385	-3.928	3.634	-0.457	0.009	-0.77	0.057	1.168	0	6	237	304	0.0235951	0.999134	1.06277	0.598366	62.3
2019-3	47	2019-09-14	11:29:00	D8304-PycnspB	P. kellumi	MMJ	2.227	0.008	35.657	0.016	-3.489	5.571	0.666	6.161	1.599	1.618	-0.244	0.012	0.266	0.062	-5.597	0	6	237	304	0.0235951	0.999134	1.06277	0.745738	7.1
Carbonate standards
SEPT 2015 session MAT253							DEC 2015 session MAT253						FEB 2016 session MAT253						2019 sessions MAT253						All MAT253 sessions
CARRARA	d13C (PDB)	d18O_carb	BRD47rfac_P	TEMPERATURE			CARRARA	d13C (PDB)	d18O_carb	BRD47rfac_P	TEMPERATURE		CARRARA	d13C (PDB)	d18O_carb	BRD47rfac_P	TEMPERATURE		CARRARA	d13C (PDB)	d18O_carb	BRD47rfac_P	TEMPERATURE		CARRARA	d13C (PDB)	d18O_carb	BRD47rfac_P	TEMPERATURE
MEAN	1.87941	-2.26826	0.398314	258.911			MEAN	1.86937	-2.39409	0.39503	259.72		MEAN	1.92277	-2.21562	0.385037	280.38		MEAN	1.88412	-2.26694	0.429604	212.241		MEAN	1.88767	-2.27569	0.409471	242.091
SD	0.0843458	0.110573	0.0297294	67.8756			SD	0.0910194	0.234004	0.0217365	43.9787		SD	0.0429094	0.0571792	0.0205146	45.7441		SD	0.0454669	0.271676	0.0509306	65.8237		SD	0.0633826	0.216592	0.0426793	64.856
SE	0.0281153	0.0368577	0.00990981	22.6252			SE	0.0407051	0.10465	0.00972086	19.6679		SE	0.0191897	0.0255713	0.00917441	20.4574		SE	0.0110273	0.0658912	0.0123525	15.9646		SE	0.0107136	0.0366107	0.00721412	10.9627
SE 95%CI	0.0551059	0.0722412	0.0194232	44.3454			SE 95%CI	0.079782	0.205113	0.0190529	38.549		SE 95%CI	0.0376118	0.0501198	0.0179818	40.0965		SE 95%CI	0.0216136	0.129147	0.0242108	31.2906		SE 95%CI	0.0209987	0.071757	0.0141397	21.4868
N =	9						N =	5					N =	5					N =	17					N =	35
OOIDS	d13C (PDB)	d18O_carb	BRD47rfac_P	TEMPERATURE			OOIDS	d13C (PDB)	d18O_carb	BRD47rfac_P	TEMPERATURE		OOIDS	d13C (PDB)	d18O_carb	BRD47rfac_P	TEMPERATURE		OOIDS	d13C (PDB)	d18O_carb	BRD47rfac_P	TEMPERATURE		OOIDS	d13C (PDB)	d18O_carb	BRD47rfac_P	TEMPERATURE
MEAN	4.70923	0.0157958	0.683684	27.2625			MEAN	4.73057	-0.0436294	0.672198	30.975		MEAN	4.70545	-0.0029681	0.653906	38.175		MEAN	4.73043	-0.0244478	0.692119	25.3357		MEAN	4.72146	-0.0134098	0.682119	28.3133
SD	0.117253	0.171521	0.0285659	10.2006			SD	0.033864	0.0984986	0.00981006	3.54718		SD	0.122405	0.118545	0.0224202	8.60634		SD	0.0730087	0.167193	0.0475748	18.8449		SD	0.0866224	0.150082	0.0380243	14.5689
SE	0.0414551	0.0606417	0.0100996	3.60644			SE	0.016932	0.0492493	0.00490503	1.77359		SE	0.0612023	0.0592727	0.0112101	4.30317		SE	0.0195124	0.0446841	0.0127149	5.0365		SE	0.015815	0.0274011	0.00694226	2.6599
SE 95%CI	0.081252	0.118858	0.0197952	7.06862			SE 95%CI	0.0331867	0.0965286	0.00961386	3.47624		SE 95%CI	0.119957	0.116174	0.0219718	8.43422		SE 95%CI	0.0382443	0.0875809	0.0249212	9.87154		SE 95%CI	0.0309974	0.0537061	0.0136068	5.2134
N =	8						N =	4					N =	4					N =	14					N =	30
TABLE S1e2. REPLICATE LEVEL MAT 253 DATA (INCLUDING GAS, CARBONATE STANDARDS, AND BAD MEASUREMENTS)
MeasSess	Day	Date	Time	Name	Taxa	SmpID	BRd13C	BRsd13	BRd18O	BRsd18	d18O_carb	BRd45	BRd46	BRd47	BRd48	BRd49	BRD47	BRse47	BRD48	BRD49	Bad	window	Day1	Day2	SlopeETF_BRP	IntETF_BRP	BRD47rfac_P	T_uniBRP	notes
X2015-09-Sept	2	2015-09-10	11:46:42	Evap25C	NA	E	-41.6391	0.00578673	46.4831	0.0140725	NA	-35.2015	11.023	-26.4357	22.8356	19.7413	-0.5613	0.00997192	0.653321	36.9429	0	1	1	2	1.00412	1.00219	1.00477	-46.7
X2015-09-Sept	2	2015-09-10	13:41:53	MDIW25C	NA	E	-41.5535	0.00613657	30.7278	0.0123734	NA	-35.6487	-4.18399	-41.598	-11.6959	25.9126	-0.890709	0.0116145	-3.37394	75.2586	0	1	1	2	1.00412	1.00219	0.957452	-39.1
X2015-09-Sept	2	2015-09-10	15:53:00	2xEV25C	NA	E	-41.7444	0.00676048	70.5647	0.0151167	NA	-34.5013	34.266	-3.26462	76.9257	5.52825	-0.113725	0.0104704	6.74866	-22.8852	0	1	1	2	1.00412	1.00219	1.02103	-49.1
X2015-09-Sept	2	2015-09-10	19:55:52	Evap25C	NA	E	-41.4543	0.00581588	46.8239	0.0120517	NA	-35.0168	11.3523	-25.9428	23.9258	18.5371	-0.572866	0.0102567	1.06758	34.8445	0	1	1	2	1.00412	1.00219	0.983945	-43.5
X2015-09-Sept	3	2015-09-11	08:35:10	2xEV25C	NA	E	-41.5546	0.005824	71.0259	0.0178274	NA	-34.3082	34.7117	-2.67775	77.957	9.13361	-0.15496	0.0112633	6.84503	-20.4202	0	2	3	7	1.0447	1.04355	1.00791	-47.2
X2015-09-Sept	5	2015-09-13	11:10:13	2xEV25C	NA	E	-41.5079	0.0054654	71.086	0.0146653	NA	-34.2623	34.7697	-2.57904	78.4152	10.8665	-0.160166	0.0116258	7.15994	-18.8961	0	2	3	7	1.0447	1.04355	1.00047	-46
X2015-09-Sept	6	2015-09-14	08:16:11	Evap25C	NA	E	-41.1813	0.00595779	47.1875	0.0130341	NA	-34.7487	11.7038	-25.3725	25.145	13.0301	-0.61588	0.0100535	1.56325	28.242	0	2	3	7	1.0447	1.04355	0.986097	-43.8
X2015-09-Sept	7	2015-09-15	11:03:53	MDIW25C	NA	E	-41.5354	0.00622152	30.2882	0.01987	NA	-35.6464	-4.60821	-42.0557	-12.9789	21.5757	-0.952163	0.00994521	-3.81922	71.6066	0	2	3	7	1.0447	1.04355	0.972725	-41.7
X2015-09-Sept	9	2015-09-17	08:51:18	Evap25C	NA	E	-41.8393	0.00646427	46.1555	0.0251825	NA	-35.4002	10.7063	-27.0261	23.6382	13.777	-0.647398	0.0106048	2.06614	31.7394	0	3	8	13	1.04668	1.03386	1.02379	-49.5
X2015-09-Sept	10	2015-09-18	10:38:28	2xEV25C	NA	E	-41.4913	0.00575949	71.57	0.0169767	NA	-34.2308	35.2369	-2.11226	81.7431	7.41725	-0.1693	0.0115017	9.35628	-23.1436	0	3	8	13	1.04668	1.03386	0.975199	-42.1
X2015-09-Sept	11	2015-09-19	15:14:08	MDIW25C	NA	E	-41.5192	0.00614168	30.1023	0.0136986	NA	-35.6375	-4.78764	-42.2819	-13.1456	17.7286	-1.0207	0.0103242	-3.62818	67.9384	0	3	8	13	1.04668	1.03386	0.969249	-41.1
X2015-09-Sept	12	2015-09-20	20:22:52	Evap25C	NA	E	-41.7491	0.00596714	46.367	0.0129634	NA	-35.3086	10.9107	-26.753	23.4607	15.6831	-0.663491	0.0123525	1.48725	33.164	0	3	8	13	1.04668	1.03386	1.00093	-46.1
X2015-09-Sept	13	2015-09-21	22:57:58	MDIW25C	NA	E	-41.5517	0.00564788	30.1199	0.013522	NA	-35.6674	-4.77067	-42.2776	-12.5777	16.5752	-1.00094	0.011116	-3.08879	66.7278	0	3	8	13	1.04668	1.03386	0.989831	-44.4
X2015-09-Sept	15	2015-09-23	14:29:30	Evap25C	NA	E	-41.4144	0.00621568	46.8222	0.0232948	NA	-34.9795	11.3508	-25.9879	24.656	15.4601	-0.657675	0.0101556	1.78449	31.6786	0	4	14	21	1.03557	1.0492	1.0421	-52.1
X2015-09-Sept	16	2015-09-24	18:32:35	2xEV25C	NA	E	-41.1797	0.00539278	70.6145	0.0127133	NA	-33.9701	34.3154	-2.68279	80.9457	5.86648	-0.145688	0.010681	10.4103	-23.2233	0	4	14	21	1.03557	1.0492	1.03248	-50.8
X2015-09-Sept	18	2015-09-26	14:59:57	MDIW25C	NA	E	-41.2498	0.00898069	30.5173	0.0148786	NA	-35.3709	-4.38649	-41.7098	-11.5012	13.1293	-1.10488	0.0103374	-2.77205	61.9576	0	4	14	21	1.03557	1.0492	0.943153	-36.7
X2015-09-Sept	19	2015-09-27	09:09:32	Evap25C	NA	E	-41.1945	0.0090085	46.6857	0.019486	NA	-34.7779	11.2195	-25.9461	25.7694	9.71366	-0.703024	0.0109948	3.13358	25.8728	0	4	14	21	1.03557	1.0492	0.994168	-45.1
X2015-09-Sept	20	2015-09-28	12:15:34	2xEV25C	NA	E	-41.1461	0.0109118	71.2233	0.0237766	NA	-33.9186	34.9031	-2.11848	82.5165	10.9322	-0.192995	0.0104879	10.7297	-19.4539	0	4	14	21	1.03557	1.0492	0.970414	-41.3
X2015-09-Sept	21	2015-09-29	16:51:08	MDIW25C	NA	E	-41.3424	0.00526785	30.9261	0.0137767	NA	-35.444	-3.99218	-41.3815	-11.6925	18.7975	-1.07307	0.0116283	-3.75434	67.1554	0	4	14	21	1.03557	1.0492	0.968492	-41
X2015-09-Sept	23	2015-10-01	08:51:42	Evap25C	NA	E	-41.3729	0.00556966	46.2066	0.0149	NA	-34.9611	10.7566	-26.5421	23.7825	11.9439	-0.669267	0.00907192	2.10755	29.272	0	5	20	28	1.04563	1.04235	1.04643	-52.7
X2015-09-Sept	24	2015-10-02	13:40:28	2xEV25C	NA	E	-41.3677	0.00603799	70.7046	0.0114055	NA	-34.1434	34.4019	-2.79557	81.0869	7.95787	-0.155423	0.0111267	10.3733	-21.1651	0	5	20	28	1.04563	1.04235	1.01839	-48.7
X2015-09-Sept	26	2015-10-04	08:58:32	MDIW25C	NA	E	-41.0866	0.00580588	30.3587	0.0153602	NA	-35.2232	-4.53921	-41.6936	-13.8542	17.2706	-1.09543	0.0104404	-4.84054	66.4452	0	5	20	28	1.04563	1.04235	0.961528	-39.8
X2015-09-Sept	28	2015-10-06	11:04:03	Evap25C	NA	E	-41.3276	0.00561971	46.4895	0.0159338	NA	-34.9092	11.0298	-26.282	23.7569	14.9008	-0.723048	0.0102224	1.54114	31.6728	0	5	20	28	1.04563	1.04235	0.984	-43.5
X2015-09-Sept	1	2015-09-09	19:01:38	CarraraHG	NA	H	1.9384	0.0104686	33.5653	0.0126929	NA	5.2305	-1.35368	3.10689	-4.84198	10.7517	-0.947724	0.00963635	-2.14221	7.82713	0	1	1	2	1.00412	1.00219	0.064487	NA
X2015-09-Sept	1	2015-09-09	21:01:45	EvapHG	NA	H	-41.0803	0.00590832	43.0447	0.0127592	NA	-34.7923	7.70521	-30.0546	15.2271	15.9386	-1.4938	0.00816618	-0.239286	39.2928	0	1	1	2	1.00412	1.00219	0.136088	NA
X2015-09-Sept	2	2015-09-10	09:44:45	2xEVHG	NA	H	-41.2066	0.00576508	62.5527	0.0167498	NA	-34.2619	26.5342	-11.3915	58.4217	12.4342	-1.18703	0.00932292	4.4116	-1.84224	0	1	1	2	1.00412	1.00219	0.0952253	NA
X2015-09-Sept	3	2015-09-11	12:29:34	OoidsHG	NA	H	4.21713	0.0059077	37.3323	0.0126343	NA	7.49363	2.2872	9.17638	6.24407	9.31242	-0.813292	0.00964033	1.65691	-3.17114	0	2	3	7	1.0447	1.04355	0.0800288	NA
X2015-09-Sept	5	2015-09-13	13:00:41	EvapHG	NA	H	-41.0028	0.00646084	37.7822	0.0135767	NA	-34.8956	2.62611	-35.1001	3.58211	18.6446	-1.63463	0.00884563	-1.66855	52.5708	0	2	3	7	1.0447	1.04355	0.118859	NA
X2015-09-Sept	6	2015-09-14	15:59:38	CarraraHG	NA	H	2.06067	0.00661386	30.2722	0.0231268	NA	5.23458	-4.53213	-0.0566013	-12.2392	12.2144	-0.976155	0.00865248	-3.22457	15.624	0	2	3	7	1.0447	1.04355	0.0969125	NA
X2015-09-Sept	8	2015-09-16	15:00:14	MDIWHG	NA	H	-40.9833	0.00478676	28.1431	0.0121462	NA	-35.2008	-6.67757	-44.4672	-18.2093	25.0516	-1.90397	0.00960891	-4.96513	79.1227	0	3	8	13	1.04668	1.03386	0.0928998	NA
X2015-09-Sept	10	2015-09-18	22:06:37	EvapHG	NA	H	-40.8808	0.00671266	35.3064	0.0196512	NA	-34.8642	0.23671	-37.4349	-1.93487	17.9642	-1.74677	0.00989084	-2.40754	56.7701	0	3	8	13	1.04668	1.03386	0.102469	NA
X2015-09-Sept	12	2015-09-20	08:29:11	2xEVHG	NA	H	-41.0156	0.00593869	54.8118	0.0150776	NA	-34.3396	19.0632	-18.7033	42.4648	12.0909	-1.35284	0.0101307	3.82735	12.3166	0	3	8	13	1.04668	1.03386	0.10201	NA
X2015-09-Sept	13	2015-09-21	12:47:20	CarraraHG	NA	H	1.66978	0.00774075	35.6124	0.0209108	NA	5.04726	0.621643	4.95747	-0.0767832	6.7512	-0.859467	0.0101731	-1.31878	0.141759	0	3	8	13	1.04668	1.03386	0.0970214	NA
X2015-09-Sept	14	2015-09-22	09:04:31	MDIWHG	NA	H	-41.2173	0.00525116	28.1476	0.0192197	NA	-35.4201	-6.67364	-44.7463	-17.2278	15.4021	-1.96495	0.0124365	-3.97829	69.2156	0	4	14	21	1.03557	1.0492	0.12282	NA
X2015-09-Sept	16	2015-09-24	08:56:46	EvapHG	NA	H	-41.0175	0.00629475	43.7217	0.0124873	NA	-34.7108	8.35897	-29.4393	17.5283	15.1174	-1.58391	0.0124374	0.727943	37.0376	0	4	14	21	1.03557	1.0492	0.162862	NA
X2015-09-Sept	17	2015-09-25	15:11:22	OoidsHG	NA	H	4.41496	0.00815213	34.3903	0.00987209	NA	7.58053	-0.552207	6.4216	-2.17912	9.05507	-0.846277	0.00976974	-1.07613	2.05437	0	4	14	21	1.03557	1.0492	0.096078	NA
X2015-09-Sept	18	2015-09-26	21:08:06	CarraraHG	NA	H	2.26373	0.00507639	32.1213	0.015142	NA	5.48711	-2.74685	1.99417	-9.73747	16.0171	-0.948266	0.00900864	-4.27472	15.5842	0	4	14	21	1.03557	1.0492	0.0930139	NA
X2015-09-Sept	20	2015-09-28	08:23:45	CarraraHG	NA	H	2.31076	0.00451757	34.739	0.0237946	NA	5.61904	-0.220038	4.64611	-3.09546	12.9166	-0.928607	0.00907823	-2.65658	7.32148	0	4	14	21	1.03557	1.0492	0.0519449	NA
X2015-09-Sept	21	2015-09-29	06:56:01	MDIWHG	NA	H	-41.2341	0.00663755	23.6295	0.017944	NA	-35.588	-11.0347	-49.1857	-28.8921	18.9578	-2.1202	0.0104516	-7.10059	82.4714	0	4	14	21	1.03557	1.0492	0.0648811	NA
X2015-09-Sept	22	2015-09-30	15:47:11	2xEVHG	NA	H	-41.264	0.00500017	60.442	0.0157713	NA	-34.3856	24.4967	-13.5389	55.3673	18.9682	-1.2776	0.0112714	5.50057	8.66329	0	5	20	28	1.04563	1.04235	0.100769	NA
X2015-09-Sept	23	2015-10-01	18:36:41	EvapHG	NA	H	-41.2806	0.00545567	41.3792	0.0107772	NA	-35.0358	6.09725	-31.9736	12.7556	9.56829	-1.64462	0.0106128	0.517299	36.2986	0	5	20	28	1.04563	1.04235	0.155867	NA
X2015-09-Sept	25	2015-10-03	07:10:51	CarraraHG	NA	H	2.02121	0.0046621	32.5416	0.0156669	NA	5.2738	-2.34162	2.23821	-8.56359	11.1483	-0.885406	0.00896059	-3.90407	10.1392	0	5	20	28	1.04563	1.04235	0.135253	NA
X2015-09-Sept	2	2015-09-10	18:03:51	Carrara1	NA	C	1.92437	0.00979365	36.9538	0.0123436	-2.24124	5.33095	1.91697	6.78482	2.83263	6.2543	-0.606058	0.0119441	-1.00109	-3.1898	0	1	1	2	1.00412	1.00219	0.338805	415.3
X2015-09-Sept	3	2015-09-11	10:34:21	Carrara2	NA	C	1.87902	0.00436669	37.0252	0.0109301	-2.17255	5.29081	1.98578	6.83936	2.30561	14.596	-0.578246	0.00940659	-1.66323	4.98072	0	2	3	7	1.0447	1.04355	0.372921	304.1
X2015-09-Sept	6	2015-09-14	20:32:42	Carrara3	NA	C	1.92504	0.00584982	36.9576	0.0189842	-2.23756	5.3317	1.92066	6.84037	2.43885	12.0443	-0.555314	0.00992893	-1.40075	2.53771	0	2	3	7	1.0447	1.04355	0.396857	252
X2015-09-Sept	11	2015-09-19	09:23:54	Carrara4	NA	C	1.81348	0.0056573	36.8589	0.0105182	-2.33248	5.22378	1.8252	6.64774	2.46115	10.6033	-0.542226	0.0105612	-1.1882	1.41235	0	3	8	13	1.04668	1.03386	0.391824	261.8
X2015-09-Sept	14	2015-09-22	14:58:49	Carrara5	NA	C	1.91952	0.00601172	36.8894	0.0149256	-2.30315	5.32424	1.85485	6.78611	2.12213	13.4186	-0.536983	0.0097129	-1.58509	4.03669	0	4	14	21	1.03557	1.0492	0.407931	232.3
X2015-09-Sept	17	2015-09-25	13:15:41	Carrara6	NA	C	1.84731	0.00472019	36.9855	0.0166364	-2.21067	5.25974	1.94747	6.82078	2.48227	13.7785	-0.527249	0.00990302	-1.41093	4.27948	0	4	14	21	1.03557	1.0492	0.417208	217.3
X2015-09-Sept	21	2015-09-29	22:39:24	Carrara7	NA	C	1.71652	0.00553631	36.7427	0.0148306	-2.44433	5.12897	1.7128	6.44588	1.73587	11.8245	-0.535156	0.010004	-1.68684	2.94436	0	4	14	21	1.03557	1.0492	0.417704	216.6
X2015-09-Sept	25	2015-10-03	17:43:07	Carrara8	NA	C	1.87132	0.00572123	36.8027	0.0185954	-2.38663	5.27613	1.771	6.70161	0.930334	11.2657	-0.489275	0.00948068	-2.60554	2.1196	0	5	20	28	1.04563	1.04235	0.443201	181.6
X2015-09-Sept	27	2015-10-05	17:13:41	Carrara9	NA	C	2.01806	0.00534164	37.1154	0.0102148	-2.08576	5.42422	2.07314	7.11955	3.40547	10.8945	-0.52263	0.0103578	-0.741978	1.00115	0	5	20	28	1.04563	1.04235	0.398374	249.2
X2015-09-Sept	2	2015-09-10	23:33:31	Ooids1	NA	O	4.74625	0.00937027	39.253	0.0100042	-0.0289408	8.0541	4.14221	12.2235	8.58929	6.97252	-0.19046	0.00995289	0.285406	-9.67637	0	1	1	2	1.00412	1.00219	0.654442	37.7
X2015-09-Sept	4	2015-09-12	07:54:17	Ooids2	NA	O	4.4927	0.00675935	39.5728	0.00917331	0.278757	7.82704	4.45035	12.2679	9.56281	6.90117	-0.215875	0.00997633	0.63669	-10.1059	0	2	3	7	1.0447	1.04355	0.641526	42.9
X2015-09-Sept	8	2015-09-16	00:57:53	Ooids3	NA	O	4.70187	0.00520554	39.1214	0.016122	-0.1555	8.00808	4.01516	12.0734	7.14552	13.4744	-0.16734	0.0100017	-0.893676	-2.98566	0	3	8	13	1.04668	1.03386	0.664651	33.7
X2015-09-Sept	12	2015-09-20	10:26:35	Ooids4	NA	O	4.78957	0.00437164	39.3352	0.0165312	0.0501684	8.09748	4.22167	12.4146	7.82206	11.4654	-0.123862	0.00931451	-0.633679	-5.45808	0	3	8	13	1.04668	1.03386	0.702638	20.3
X2015-09-Sept	15	2015-09-23	06:50:06	Ooids5	NA	O	4.67664	0.00489882	39.0619	0.0196572	-0.212751	7.98243	3.95768	12.0311	7.39247	9.76094	-0.126547	0.0102882	-0.534244	-6.50007	0	4	14	21	1.03557	1.0492	0.711476	17.5
X2015-09-Sept	19	2015-09-27	13:19:55	Ooids6	NA	O	4.79883	0.00499762	39.4458	0.0267281	0.156631	8.10986	4.32848	12.5283	7.29558	14.0586	-0.128835	0.0112947	-1.3682	-3.12963	0	4	14	21	1.03557	1.0492	0.697589	22
X2015-09-Sept	24	2015-10-02	07:08:19	Ooids7	NA	O	4.60918	0.00817512	39.171	0.0195938	-0.107831	7.92282	4.06279	12.0991	7.55423	7.29053	-0.101325	0.0105337	-0.583031	-9.07215	0	5	20	28	1.04563	1.04235	0.720358	14.7
X2015-09-Sept	26	2015-10-04	16:58:13	Ooids8	NA	O	4.8588	0.00513692	39.4346	0.0127263	0.145833	8.16573	4.31778	12.5722	7.74791	14.3742	-0.132215	0.0101892	-0.898454	-2.85738	0	5	20	28	1.04563	1.04235	0.676794	29.3
X2015-09-Sept	4	2015-09-12	10:52:49	D11889-pycn	P. newberryi	S	1.78893	0.00603651	35.2476	0.0111018	-3.88288	5.14676	0.269852	5.22445	4.56972	11.8985	-0.350549	0.00893426	4.02781	5.84411	0	2	3	7	1.0447	1.04355	0.643507	42
X2015-09-Sept	4	2015-09-12	12:47:29	D5792-pycn	P. newberryi	S	3.69744	0.00644069	34.428	0.0124128	-4.6715	6.90896	-0.51724	5.99865	154.236	-1.60917	-0.613449	0.019052	155.431	-7.8996	1	2	3	7	1.0447	1.04355	0.353173	361.2
X2015-09-Sept	6	2015-09-14	10:29:51	D5737-exoB	Exogyra	S	0.85937	0.00536878	34.0963	0.0149083	-4.99071	4.23647	-0.843436	3.15484	-3.12875	12.3632	-0.38194	0.00979633	-1.445	9.48476	0	2	3	7	1.0447	1.04355	0.652635	38.4
X2015-09-Sept	6	2015-09-14	12:27:36	D4353-pyncB	P. newberryi	S	4.00897	0.00531268	35.7091	0.0120769	-3.43891	7.24404	0.719904	7.90291	8.79758	12.045	-0.281987	0.010533	7.34674	2.87107	1	2	3	7	1.0447	1.04355	0.660877	35.2
X2015-09-Sept	6	2015-09-14	14:31:04	D10440-pync	P. newberryi	S	1.459	0.00564383	35.0927	0.0137677	-4.03194	4.83218	0.11963	4.77654	48.3456	9.62991	-0.325661	0.0156122	48.0948	4.22018	1	2	3	7	1.0447	1.04355	0.678581	28.6
X2015-09-Sept	7	2015-09-15	15:02:22	D5737-exoB	Exogyra	S	0.695218	0.00528567	33.7757	0.0158349	-5.29914	4.07178	-1.15318	2.69887	-2.5005	12.557	-0.362553	0.011935	-0.195886	10.4699	0	2	3	7	1.0447	1.04355	0.682125	27.4
X2015-09-Sept	7	2015-09-15	18:55:40	D5737-exoB	Exogyra	S	0.688485	0.00524928	33.7068	0.0185242	-5.36544	4.06316	-1.21971	2.61147	-2.53906	13.439	-0.375376	0.0103122	-0.10136	11.4917	0	2	3	7	1.0447	1.04355	0.670499	31.6
X2015-09-Sept	21	2015-09-29	20:41:30	D5737-exoB	Exogyra	S	0.662227	0.00840486	33.5971	0.0176084	-5.47105	4.03485	-1.3257	2.4888	-4.54945	12.8047	-0.364303	0.00857305	-1.90481	11.0999	0	4	14	21	1.03557	1.0492	0.686293	25.9
MeasSess	Day	Date	Time	Name	Taxa	SmpID	BRd13C	BRsd13	BRd18O	BRsd18	d18O_carb	BRd45	BRd46	BRd47	BRd48	BRd49	BRD47	BRse47	BRD48	BRD49	Bad	window	Day1	Day2	SlopeETF_BRP	IntETF_BRP	BRD47rfac_P	T_uniBRP
X2015-12-Dec	1	2015-11-30	16:48:54	2xEV25C	NA	E	-41.2166	0.0058305	70.4466	0.0119134	NA	-34.0102	34.1532	-2.82923	78.1193	7.84354	-0.0955515	0.0104533	8.08449	-20.9586	0	1	1	13	1.06018	0.979908	0.999206	NA
X2015-12-Dec	1	2015-11-30	20:33:28	MDIW25C	NA	E	-41.0776	0.00593582	30.6635	0.0122273	NA	-35.2045	-4.24504	-41.0696	-11.0853	19.3086	-0.755076	0.0106414	-2.63585	67.9399	0	1	1	13	1.06018	0.979908	0.956874	NA
X2015-12-Dec	1	2015-11-30	22:36:57	Evap25C	NA	E	-41.1124	0.00644942	47.5576	0.0150641	NA	-34.6717	12.0612	-24.8066	26.9068	13.0198	-0.464895	0.00935258	2.57598	27.4312	0	1	1	13	1.06018	0.979908	0.985155	NA
X2015-12-Dec	2	2015-12-01	16:12:52	2xEV25C	NA	E	-41.3568	0.00567624	71.1154	0.0198479	NA	-34.1197	34.7985	-2.32279	80.2606	6.12578	-0.0832848	0.0106155	8.8273	-23.7048	0	1	1	13	1.06018	0.979908	1.00351	NA
X2015-12-Dec	3	2015-12-02	23:36:26	MDIW25C	NA	E	-41.4304	0.0056616	30.1726	0.0167422	NA	-35.5519	-4.7196	-41.8666	-11.5334	14.2613	-0.746261	0.011031	-2.1369	64.0564	0	1	1	13	1.06018	0.979908	0.979911	NA
X2015-12-Dec	5	2015-12-04	21:38:56	Evap25C	NA	E	-41.0834	0.0062196	47.4336	0.0142208	NA	-34.6487	11.9415	-24.8845	26.7459	12.7995	-0.45332	0.0108704	2.65608	27.42	0	1	1	13	1.06018	0.979908	0.998767	NA
X2015-12-Dec	6	2015-12-05	10:40:37	MDIW25C	NA	E	-41.0847	0.00547101	30.4378	0.0111744	NA	-35.2188	-4.46286	-41.2511	-11.1974	20.9005	-0.714192	0.00966395	-2.31255	70.0842	0	1	1	13	1.06018	0.979908	1.00334	NA
X2015-12-Dec	7	2015-12-06	14:42:49	2xEV25C	NA	E	-41.1658	0.0064147	70.5032	0.0211515	NA	-33.9608	34.2079	-2.71669	79.0327	4.47845	-0.0876253	0.0125721	8.83174	-24.3824	0	1	1	13	1.06018	0.979908	1.00568	NA
X2015-12-Dec	9	2015-12-08	10:34:41	Evap25C	NA	E	-40.9673	0.00594264	47.7915	0.0119404	NA	-34.528	12.2873	-24.4168	27.1543	13.0228	-0.438591	0.0107797	2.36987	26.8203	0	1	1	13	1.06018	0.979908	1.00635	NA
X2015-12-Dec	11	2015-12-10	06:54:01	MDIW25C	NA	E	-41.223	0.00674579	30.0567	0.0127602	NA	-35.3612	-4.83104	-41.7636	-10.7425	10.7313	-0.732929	0.00987636	-1.11479	60.3622	0	1	1	13	1.06018	0.979908	0.992275	NA
X2015-12-Dec	12	2015-12-11	16:12:37	2xEV25C	NA	E	-41.2359	0.00580608	71.167	0.0179304	NA	-34.0046	34.8485	-2.17337	80.5305	7.14967	-0.104226	0.0112276	8.98171	-22.9286	0	1	1	13	1.06018	0.979908	0.978742	NA
X2015-12-Dec	1	2015-11-30	13:02:36	2xEVHG	NA	H	-41.1256	0.00855005	55.1042	0.0220681	NA	-34.433	19.3451	-18.3663	43.1169	9.90117	-1.18137	0.00912914	3.89976	9.68248	0	1	1	13	1.06018	0.979908	0.11493	NA
X2015-12-Dec	1	2015-11-30	14:56:15	CarraraHG	NA	H	1.91947	0.0061444	29.4743	0.0147529	NA	5.07536	-5.30258	-0.957116	-13.812	11.7222	-0.952456	0.00963163	-3.26954	16.8476	0	1	1	13	1.06018	0.979908	0.058571	NA
X2015-12-Dec	1	2015-11-30	18:41:18	MDIWHG	NA	H	-41.1724	0.00618113	28.1566	0.0195632	NA	-35.3777	-6.6649	-44.3811	-16.7895	18.0809	-1.63742	0.0105951	-3.55163	71.9675	0	1	1	13	1.06018	0.979908	0.0783114	NA
X2015-12-Dec	2	2015-12-01	08:40:49	2xEVHG	NA	H	-41.0711	0.00701869	58.5244	0.0227601	NA	-34.2684	22.6464	-15.0293	53.0831	-7.26285	-1.13982	0.0115876	6.95829	-13.9373	0	1	1	13	1.06018	0.979908	0.101659	NA
X2015-12-Dec	4	2015-12-03	10:36:03	EvapHG	NA	H	-41.0643	0.00638982	35.4036	0.0232741	NA	-35.033	0.330145	-37.2404	-0.49072	15.5381	-1.45624	0.0117281	-1.1507	54.2553	0	1	1	13	1.06018	0.979908	0.147739	NA
X2015-12-Dec	5	2015-12-04	15:09:14	CarraraHG	NA	H	1.82872	0.00522521	35.8753	0.0133922	NA	5.20511	0.875827	5.40073	0.706152	7.3646	-0.830254	0.0103224	-1.0444	0.0843752	0	1	1	13	1.06018	0.979908	0.0789138	NA
X2015-12-Dec	7	2015-12-06	02:42:48	EvapHG	NA	H	-41.16	0.00732629	42.1862	0.0131593	NA	-34.8958	6.87644	-30.851	14.069	13.4496	-1.39641	0.00980001	0.264862	38.5416	0	1	1	13	1.06018	0.979908	0.101411	NA
X2015-12-Dec	8	2015-12-07	14:32:41	MDIWHG	NA	H	-40.9078	0.00702851	28.4552	0.0283859	NA	-35.1196	-6.37609	-43.8186	-14.6611	12.2347	-1.61109	0.010573	-1.97505	64.8992	0	1	1	13	1.06018	0.979908	0.0965666	NA
X2015-12-Dec	9	2015-12-08	23:58:34	CarraraHG	NA	H	2.10212	0.00514991	31.6525	0.0126513	NA	5.31982	-3.19963	1.4515	-8.8887	10.0688	-0.87193	0.00890523	-2.51572	10.7191	0	1	1	13	1.06018	0.979908	0.102569	NA
X2015-12-Dec	11	2015-12-10	14:30:40	EvapHG	NA	H	-41.1362	0.00688061	44.5851	0.0118279	NA	-34.7933	9.19215	-28.5383	19.7844	13.0116	-1.37928	0.0122629	1.29141	33.3041	0	1	1	13	1.06018	0.979908	0.0798416	NA
X2015-12-Dec	13	2015-12-12	12:35:06	2xEVHG	NA	H	-41.0418	0.00668157	65.3031	0.0183456	NA	-34.0163	29.1893	-8.44605	66.6335	9.7609	-1.012	0.0108189	6.98859	-9.78206	0	1	1	13	1.06018	0.979908	0.124087	NA
X2015-12-Dec	2	2015-12-01	00:54:42	Carrara1	NA	C	1.90911	0.00485603	36.9452	0.0182187	-2.24947	5.31635	1.90867	6.83098	3.03033	10.3151	-0.537139	0.0103515	-0.787621	0.864639	0	1	1	13	1.06018	0.979908	0.365101	324.9
X2015-12-Dec	2	2015-12-01	10:32:38	Carrara2	NA	C	1.95905	0.00555782	37.0292	0.0236797	-2.16864	5.36599	1.98986	7.0018	3.43862	9.45328	-0.498118	0.0109659	-0.542884	-0.200934	0	1	1	13	1.06018	0.979908	0.403536	239.8
X2015-12-Dec	4	2015-12-03	14:25:24	Carrara3	NA	C	1.7178	0.00552412	36.4016	0.011951	-2.77251	5.11874	1.38358	6.129	1.9709	2.19916	-0.516383	0.0095949	-0.795941	-5.94387	0	1	1	13	1.06018	0.979908	0.399165	247.7
X2015-12-Dec	9	2015-12-08	08:41:01	Carrara4	NA	C	1.89263	0.00572987	36.8461	0.0187608	-2.34487	5.29757	1.81294	6.77112	3.36299	3.76926	-0.483396	0.00982079	-0.265178	-5.41343	0	1	1	13	1.06018	0.979908	0.423107	208.5
X2015-12-Dec	13	2015-12-12	10:26:00	Carrara5	NA	C	1.86824	0.00674808	36.7525	0.0228111	-2.43494	5.27157	1.72254	6.61548	2.91715	8.22602	-0.522578	0.0119807	-0.529043	-0.79273	0	1	1	13	1.06018	0.979908	0.38424	277.7
X2015-12-Dec	2	2015-12-01	06:49:31	Ooids1	NA	O	4.70132	0.00599282	39.0847	0.0114355	-0.190846	8.00634	3.9797	12.0377	8.52911	0.336158	-0.166051	0.0108986	0.549552	-15.8404	0	1	1	13	1.06018	0.979908	0.669082	32.1
X2015-12-Dec	2	2015-12-01	22:07:01	Ooids2	NA	O	4.77254	0.00522739	39.277	0.0108466	-0.00579324	8.07956	4.16549	12.2999	8.6513	8.88514	-0.163827	0.0105826	0.300524	-7.86728	0	1	1	13	1.06018	0.979908	0.666935	32.9
X2015-12-Dec	6	2015-12-05	18:35:30	Ooids3	NA	O	4.70495	0.005204	39.2913	0.0150531	0.00793252	8.01665	4.17912	12.2465	8.46277	8.43741	-0.165584	0.00989337	0.0864071	-8.26808	0	1	1	13	1.06018	0.979908	0.66599	33.2
X2015-12-Dec	12	2015-12-11	00:06:31	Ooids5	NA	O	4.74349	0.00767038	39.2978	0.0150265	0.0141892	8.05301	4.18548	12.3114	9.51598	4.29384	-0.144919	0.00969444	1.11819	-12.3932	0	1	1	13	1.06018	0.979908	0.686784	25.7
X2015-12-Dec	2	2015-12-01	20:14:01	D5737-exoA	Exogyra	S	0.510048	0.00509825	33.779	0.0128652	-5.29596	3.89825	-1.15039	2.57748	-4.0316	11.4988	-0.308098	0.0118535	-1.73611	9.59425	0	1	1	13	1.06018	0.979908	0.680992	27.8
X2015-12-Dec	3	2015-12-02	10:28:49	D5737-exoA	Exogyra	S	0.513292	0.00523709	34.2078	0.0217501	-4.88344	3.91568	-0.736555	2.94823	-2.77187	10.6414	-0.363512	0.0106941	-1.3012	7.89908	0	1	1	13	1.06018	0.979908	0.615875	54
X2015-12-Dec	3	2015-12-02	15:59:28	D5737-exoA	Exogyra	S	0.648166	0.00528791	34.0672	0.0298981	-5.01871	4.03744	-0.871967	2.97486	-2.55301	10.6176	-0.32884	0.00916743	-0.811257	8.01354	0	1	1	13	1.06018	0.979908	0.652175	38.6
X2015-12-Dec	6	2015-12-05	14:25:56	D2052-exo	Exogyra	S	0.511082	0.00500781	34.1265	0.0181146	-4.96163	3.91088	-0.815	2.89006	-1.37582	7.70457	-0.339408	0.0112194	0.253955	5.13039	0	1	1	13	1.06018	0.979908	0.642429	42.5
X2015-12-Dec	6	2015-12-05	16:41:23	D6899-ostC	Ostrea	S	0.0394042	0.00544905	30.9826	0.0118686	-7.98673	3.36304	-3.85064	-0.696147	11.6942	9.97765	-0.366942	0.0111022	19.5308	14.029	0	1	1	13	1.06018	0.979908	0.67484	30
X2015-12-Dec	7	2015-12-06	18:31:14	D2052-exo	Exogyra	S	0.601165	0.00618898	34.2252	0.0128572	-4.86671	3.99866	-0.71959	3.06625	-0.216453	7.27641	-0.347814	0.0092009	1.224	4.42124	0	1	1	13	1.06018	0.979908	0.630489	47.5
X2015-12-Dec	7	2015-12-06	22:20:02	D6899-ostC	Ostrea	S	0.588426	0.00581131	30.8599	0.00943993	-8.10481	3.87375	-3.96794	-0.302003	7.78582	11.0403	-0.381744	0.0105	15.8314	14.7806	0	1	1	13	1.06018	0.979908	0.652376	38.5
MeasSess	Day	Date	Time	Name	Taxa	SmpID	BRd13C	BRsd13	BRd18O	BRsd18	d18O_carb	BRd45	BRd46	BRd47	BRd48	BRd49	BRD47	BRse47	BRD48	BRD49	Bad	window	Day1	Day2	SlopeETF_BRP	IntETF_BRP	BRD47rfac_P	T_uniBRP
X2016-02-Feb	1	2016-02-22	20:40:25	2xEV25C	NA	E	-41.1756	0.00698147	70.6045	0.0171268	NA	-33.9666	34.3057	-2.65618	79.343	2.48086	-0.113533	0.011601	8.93101	-26.4969	0	1	1	2	1.09065	1.01359	1.00923	NA
X2016-02-Feb	2	2016-02-23	07:43:50	MDIW25C	NA	E	-41.2557	0.00588099	29.9142	0.0164777	NA	-35.3967	-4.9686	-41.9903	-12.7044	16.8563	-0.795694	0.010961	-2.82012	67.1194	0	1	1	2	1.09065	1.01359	0.9681	NA
X2016-02-Feb	2	2016-02-23	09:36:50	Evap25C	NA	E	-41.4017	0.00588089	46.125	0.0250665	NA	-34.9909	10.6778	-26.4789	23.864	8.7484	-0.495918	0.0106413	2.34367	26.2128	0	1	1	2	1.09065	1.01359	1.01788	NA
X2016-02-Feb	2	2016-02-23	21:20:14	MDIW25C_b	NA	E	-41.122	0.0057031	30.5061	0.0116029	NA	-35.2514	-4.39709	-41.2861	-11.2593	16.5783	-0.780588	0.0123454	-2.50681	65.4541	0	1	1	2	1.09065	1.01359	0.971993	NA
X2016-02-Feb	4	2016-02-25	08:59:00	2xEV25C	NA	E	-40.6035	0.00716788	71.3644	0.0228312	NA	-33.4051	35.0404	-1.33578	81.4904	3.75473	-0.0885683	0.0104989	9.50364	-27.2225	0	2	3	12	1.05093	0.989721	0.993813	NA
X2016-02-Feb	5	2016-02-26	16:24:14	Evap25C	NA	E	-40.7626	0.00586398	46.9874	0.0185424	NA	-34.3628	11.5116	-25.0412	25.7298	9.71259	-0.502526	0.0112747	2.51553	24.8189	0	2	3	12	1.05093	0.989721	1.00546	NA
X2016-02-Feb	7	2016-02-28	00:26:58	MDIW25C	NA	E	-40.8273	0.00589994	30.4177	0.0243486	NA	-34.9781	-4.48172	-41.1064	-11.644	16.3886	-0.802341	0.0116885	-2.72538	65.1106	0	2	3	12	1.05093	0.989721	0.993105	NA
X2016-02-Feb	9	2016-03-01	12:59:12	Evap25C	NA	E	-41.0355	0.0062009	46.1983	0.0144491	NA	-34.645	10.7493	-26.0702	24.3104	9.02284	-0.516024	0.0101764	2.63886	25.9562	0	2	3	12	1.05093	0.989721	1.01067	NA
X2016-02-Feb	10	2016-03-02	22:41:03	MDIW25C	NA	E	-40.9721	0.00569807	30.2834	0.017777	NA	-35.1183	-4.61173	-41.4126	-11.8966	13.8252	-0.843189	0.0116891	-2.7198	62.8618	0	2	3	12	1.05093	0.989721	0.955947	NA
X2016-02-Feb	14	2016-03-06	00:21:49	Evap25C	NA	E	-40.9835	0.0062764	46.1949	0.0183085	NA	-34.5964	10.7462	-26.0681	24.4916	10.6846	-0.56284	0.0116719	2.82235	27.5967	0	2	3	12	1.05093	0.989721	0.96143	NA
X2016-02-Feb	1	2016-02-22	18:45:12	CarraraHG	NA	H	1.88625	0.00494767	34.9619	0.0160358	-4.15781	5.22844	-0.00574016	4.51894	-1.60391	7.28574	-0.865225	0.00823872	-1.59241	1.71448	0	1	1	2	1.09065	1.01359	0.0611824	NA
X2016-02-Feb	1	2016-02-22	22:41:02	OoidsHG	NA	H	4.34706	0.00573096	26.1732	0.0154453	-12.6143	7.24075	-8.48378	-1.87173	-20.3893	8.12855	-0.938336	0.0105056	-3.55373	17.3	0	1	1	2	1.09065	1.01359	0.0956398	NA
X2016-02-Feb	2	2016-02-23	15:26:38	2xEVHG	NA	H	-41.1795	0.00689256	50.7494	0.0209507	11.0329	-34.6284	15.1418	-22.6024	34.0891	6.07545	-1.23825	0.0103713	3.47006	14.2693	0	1	1	2	1.09065	1.01359	0.138978	NA
X2016-02-Feb	3	2016-02-24	12:49:26	EvapHG	NA	H	-41.1092	0.00600535	37.4549	0.022594	-1.75901	-35.0063	2.30997	-35.4114	3.74204	13.9865	-1.52911	0.0111755	-0.879515	48.5351	0	2	3	12	1.05093	0.989721	0.122006	NA
X2016-02-Feb	5	2016-02-26	08:54:56	MATHHG	NA	H	-3.74998	0.00537225	30.6977	0.0171845	-8.26088	-0.199974	-4.13362	-5.27307	-10.8348	9.71425	-1.00787	0.0109257	-2.6062	18.1833	0	2	3	12	1.05093	0.989721	0.101881	NA
X2016-02-Feb	6	2016-02-27	09:05:18	OoidsHG	NA	H	4.70857	0.00532252	36.1669	0.0162329	-2.99837	7.91542	1.16331	8.54944	0.985969	8.42489	-0.76338	0.0116128	-1.33883	-2.29426	0	2	3	12	1.05093	0.989721	0.0983601	NA
X2016-02-Feb	7	2016-02-28	13:14:05	2xEVHG	NA	H	-40.7236	0.005505	62.1446	0.0256787	21.9974	-33.8225	26.1414	-11.2471	60.4163	8.87495	-1.13521	0.0109781	7.07508	-5.08801	0	2	3	12	1.05093	0.989721	0.0806294	NA
X2016-02-Feb	8	2016-02-29	22:26:59	MATHHG	NA	H	-3.95291	0.00531931	30.0736	0.0231703	-8.86131	-0.411237	-4.73637	-6.10773	-11.7573	8.73269	-1.03403	0.0106264	-2.32898	18.6337	0	2	3	12	1.05093	0.989721	0.0901235	NA
X2016-02-Feb	13	2016-03-05	14:54:37	EvapHG	NA	H	-40.8819	0.0056937	31.8776	0.0161693	-7.12558	-34.9803	-3.07283	-40.6241	-8.77886	14.3912	-1.68545	0.0102598	-2.65929	60.0722	0	2	3	12	1.05093	0.989721	0.0559282	NA
X2016-02-Feb	14	2016-03-06	18:35:16	MDIWHG	NA	H	-40.7928	0.00558027	26.6408	0.0174109	-12.1644	-35.0727	-8.1271	-45.6315	-20.7154	14.0949	-1.82566	0.00579859	-4.60203	70.5018	0	2	3	12	1.05093	0.989721	0.00293494	NA
X2016-02-Feb	2	2016-02-23	11:35:45	Carrara1	NA	C	1.94272	0.0057254	36.9253	0.0235912	-2.26863	5.3472	1.88953	6.83234	2.75955	9.78313	-0.54865	0.0100105	-1.0192	0.342484	0	1	1	2	1.09065	1.01359	0.365117	324.8
X2016-02-Feb	2	2016-02-23	17:25:22	Carrara2	NA	C	1.94747	0.00699053	37.0201	0.0133263	-2.17739	5.35483	1.98106	6.92987	3.09935	10.4172	-0.549433	0.0104514	-0.863236	0.782867	0	1	1	2	1.09065	1.01359	0.36252	332.2
X2016-02-Feb	6	2016-02-27	18:49:26	Carrara3	NA	C	1.84872	0.00475102	36.9689	0.0228539	-2.22664	5.26051	1.93145	6.83367	3.19886	8.83634	-0.499525	0.0120492	-0.665174	-0.585789	0	2	3	12	1.05093	0.989721	0.407984	232.2
X2016-02-Feb	10	2016-03-02	12:53:42	Carrara4	NA	C	1.95232	0.00575026	37.061	0.0133864	-2.13809	5.36074	2.02051	7.02135	3.63878	6.66548	-0.503382	0.00970804	-0.404632	-3.01647	0	2	3	12	1.05093	0.989721	0.400395	245.5
X2016-02-Feb	14	2016-03-06	12:48:10	Carrara5	NA	C	1.92263	0.00620881	36.9267	0.0131274	-2.26733	5.3284	1.89079	6.84583	3.03938	8.0549	-0.517209	0.0103868	-0.742921	-1.35216	0	2	3	12	1.05093	0.989721	0.389171	267.2
X2016-02-Feb	2	2016-02-23	13:32:41	Ooids1	NA	O	4.82024	0.00487415	39.324	0.0223968	0.0394449	8.12586	4.21097	12.3591	8.40147	8.49976	-0.197306	0.0107721	-0.0378286	-8.38309	0	1	1	2	1.09065	1.01359	0.649553	39.6
X2016-02-Feb	4	2016-02-25	18:37:53	Ooids3	NA	O	4.76615	0.00591756	39.3662	0.0212029	0.0800342	8.07655	4.25158	12.3742	8.63002	7.46464	-0.171665	0.0107611	0.107927	-9.42794	0	2	3	12	1.05093	0.989721	0.64814	40.2
X2016-02-Feb	8	2016-02-29	13:08:24	Ooids4	NA	O	4.53805	0.00473704	39.0972	0.0198516	-0.178827	7.85365	3.99142	11.8611	8.13492	7.01575	-0.19578	0.0093007	0.135128	-9.13155	0	2	3	12	1.05093	0.989721	0.632466	46.7
X2016-02-Feb	12	2016-03-04	13:41:09	Ooids5	NA	O	4.69737	0.00710038	39.3324	0.0162407	0.0474753	8.01092	4.21877	12.3085	8.97408	5.23753	-0.137325	0.00997697	0.514458	-11.4857	0	2	3	12	1.05093	0.989721	0.685467	26.2
X2016-02-Feb	2	2016-02-23	23:44:43	D11889-pycn	P. newberryi	S	-0.902645	0.00473208	34.0597	0.0129256	-5.02588	2.58294	-0.882425	1.39928	-2.75171	9.93464	-0.39511	0.00835431	-0.989364	8.91045	0	1	1	2	1.09065	1.01359	0.62966	47.9
X2016-02-Feb	3	2016-02-24	07:07:43	D6899-ostC	Ostrea	S	0.294097	0.00552004	30.7349	0.0235445	-8.22507	3.59355	-4.0892	-0.73091	-7.84307	10.3575	-0.403193	0.0113851	0.321245	14.6397	0	2	3	12	1.05093	0.989721	0.651766	38.7
X2016-02-Feb	3	2016-02-24	08:57:11	D2052-exo	Exogyra	S	0.527334	0.00591468	34.1187	0.0193541	-4.96912	3.92586	-0.822478	2.88868	-3.01543	8.0456	-0.348809	0.0101892	-1.37339	5.46932	0	2	3	12	1.05093	0.989721	0.640714	43.2
X2016-02-Feb	3	2016-02-24	18:51:37	D2052-exo	Exogyra	S	0.771052	0.00631723	34.0842	0.0241877	-5.00234	4.15324	-0.855287	3.08135	-2.6393	10.7508	-0.358055	0.0101193	-0.931039	7.98934	0	2	3	12	1.05093	0.989721	0.627366	48.9
X2016-02-Feb	6	2016-02-27	11:07:07	D11889-pycn	P. newberryi	S	1.80133	0.00626513	35.6524	0.0180139	-3.49338	5.17196	0.660608	5.68628	1.05042	9.06232	-0.301117	0.0114313	-0.270846	2.2285	0	2	3	12	1.05093	0.989721	0.638119	44.3
X2016-02-Feb	7	2016-02-28	07:08:55	2052-exo	Exogyra	S	0.856184	0.00504186	34.2368	0.0222408	-4.85553	4.23819	-0.707837	3.31414	-2.16503	9.22366	-0.358367	0.00965322	-0.750904	6.08392	0	2	3	12	1.05093	0.989721	0.622652	50.9
X2016-02-Feb	7	2016-02-28	10:55:20	D11889-pnewA	P. newberryi	S	-0.0575619	0.00529918	35.0188	0.0181429	-4.10308	3.40757	0.0450683	3.37803	-0.633933	0.823119	-0.181591	0.00819178	-0.72399	-2.8872	0	2	3	12	1.05093	0.989721	0.807227	-9.1
X2016-02-Feb	8	2016-02-29	16:50:23	D13917-pkelA	P. kellumi	S	2.05557	0.00623803	34.3012	0.0224228	-4.79351	5.36506	-0.643097	4.6366	-2.72077	8.25151	-0.261766	0.0104188	-1.43681	3.78661	0	2	3	12	1.05093	0.989721	0.699254	21.5
X2016-02-Feb	8	2016-02-29	20:29:54	D8407-pnsp	P. kellumi	S	2.3322	0.0049471	34.6402	0.0249772	-4.46735	5.63584	-0.315322	5.21147	-1.99388	8.64778	-0.289923	0.0114063	-1.36418	3.24631	0	2	3	12	1.05093	0.989721	0.65883	36
X2016-02-Feb	9	2016-03-01	14:54:31	D5759-exoB	Exogyra	S	-1.11972	0.00573208	31.9698	0.0165477	-7.03686	2.30924	-2.90021	-0.896715	-7.54026	9.17134	-0.421254	0.0102309	-1.75842	12.4554	0	2	3	12	1.05093	0.989721	0.63591	45.2
X2016-02-Feb	9	2016-03-01	17:25:12	D11889-pnewA	P. newberryi	S	0.00746206	0.00557894	34.9789	0.0165069	-4.1415	3.4672	0.00666131	3.18691	0.28623	9.4862	-0.395577	0.0112705	0.272918	5.75598	0	2	3	12	1.05093	0.989721	0.585944	68.6
X2016-02-Feb	9	2016-03-01	19:27:01	D8407-pnsp	P. kellumi	S	2.19172	0.00556909	34.491	0.0186937	-4.61095	5.4991	-0.45967	4.94415	-2.34851	7.89545	-0.273649	0.0110449	-1.43067	2.92784	0	2	3	12	1.05093	0.989721	0.68097	27.8
X2016-02-Feb	9	2016-03-01	21:18:34	D11889-pycnB	P. newberryi	S	1.79449	0.00469002	35.5868	0.0157996	-3.55652	5.16335	0.597251	5.62676	1.55387	8.34696	-0.289215	0.00915266	0.358611	1.6518	0	2	3	12	1.05093	0.989721	0.651749	38.7
X2016-02-Feb	11	2016-03-03	07:10:22	D13917-pkelA	P. kellumi	S	2.19218	0.00542765	34.6255	0.0142031	-4.48146	5.50404	-0.329774	5.07699	-1.8671	8.55659	-0.274309	0.0116344	-1.20842	3.32424	0	2	3	12	1.05093	0.989721	0.677773	28.9
X2016-02-Feb	11	2016-03-03	09:03:13	D8407-pnsp	P. kellumi	S	2.29185	0.0063295	35.0366	0.0155989	-4.08594	5.61129	0.0672054	5.57248	-0.759526	8.28636	-0.281834	0.011798	-0.893781	2.15917	0	2	3	12	1.05093	0.989721	0.660528	35.3
X2016-02-Feb	11	2016-03-03	11:32:23	D11889-pnewA	P. newberryi	S	0.24986	0.00559481	35.0978	0.0149082	-4.02709	3.69849	0.121946	3.57856	-0.406214	8.97986	-0.356366	0.0106053	-0.64994	4.77702	0	2	3	12	1.05093	0.989721	0.619773	52.2
X2016-02-Feb	11	2016-03-03	13:28:07	D5759-exoB	Exogyra	S	-0.729367	0.00615355	32.5195	0.0158206	-6.50793	2.69374	-2.36879	0.0504917	-5.97055	7.78998	-0.393194	0.0111745	-1.24446	9.59877	0	2	3	12	1.05093	0.989721	0.647551	40.4
X2016-02-Feb	12	2016-03-04	09:02:36	D5759-exoB	Exogyra	S	-0.655319	0.00572687	32.5776	0.0148463	-6.45202	2.76513	-2.31255	0.189865	-3.03558	6.51102	-0.38271	0.0104888	1.59154	8.12937	0	2	3	12	1.05093	0.989721	0.655942	37.1
X2016-02-Feb	12	2016-03-04	11:00:45	D13917-pkelA	P. kellumi	S	2.22677	0.00527795	34.7327	0.0141212	-4.3784	5.54007	-0.226309	5.24477	-1.22238	6.28271	-0.246118	0.0131867	-0.770122	0.820332	0	2	3	12	1.05093	0.989721	0.704238	19.8
MeasSess	Day	Date	Time	SampleName	Taxa	SampID	BRd13C	BRse13	BRd18O	BRse18	d18O_carb	d45	d46	d47	d48	d49	BRD47	BRse47	BRD48	BRD49	Bad	window	Day1	Day2	SlopeETF_BRP	IntETF_BRP	BRD47rfac_P	T_uniBRP
X2019-04-Spring	2	2019-04-08	09:15:00	APICR	NA	E	-3.027	0.006	20.908	0.014	-17.6805	0.148	-13.582	-13.687	-34.285	6.727	-0.49	0.011	-7.508	33.984	0	1	1	27	0.986339	1.04301	0.969227	NA
X2019-04-Spring	7	2019-04-11	14:52:00	APICR-split	NA	E	-2.925	0.004	21.254	0.012	-17.3476	0.255	-13.247	-13.223	-33.927	5.559	-0.463	0.01	-7.813	31.978	0	1	1	27	0.986339	1.04301	0.984416	NA
X2019-04-Spring	17	2019-04-23	17:35:00	Tank+DI2	NA	E	-2.862	0.006	38.379	0.013	-0.869879	0.891	3.282	4.102	7.537	4.006	-0.046	0.009	0.955	-3.384	0	1	1	27	0.986339	1.04301	0.968484	NA
X2019-04-Spring	19	2019-05-01	15:50:00	MDIW-11	NA	E	-9.892	0.006	31.536	0.011	-7.45423	-5.932	-3.338	-9.72	-8.894	4.83	-0.342	0.008	-2.245	17.888	0	1	1	27	0.986339	1.04301	1.01738	NA
X2019-04-Spring	20	2019-05-09	11:35:00	2xEV	NA	E	-9.856	0.007	69.643	0.016	29.2124	-4.629	33.445	28.545	86.332	-1.822	0.6	0.011	17.157	-59.648	0	1	1	27	0.986339	1.04301	1.00289	NA
X2019-04-Spring	21	2019-05-09	13:45:00	MDIW	NA	E	-9.746	0.006	31.804	0.01	-7.19636	-5.786	-3.078	-9.316	-7.965	4.654	-0.341	0.01	-1.829	17.031	0	1	1	27	0.986339	1.04301	1.0084	NA
X2019-04-Spring	29	2019-05-15	15:35:00	Evap-1-25C	NA	E	-9.825	0.006	46.3	0.01	6.75172	-5.374	10.914	5.047	26.37	5.701	-0.075	0.01	4.328	-9.847	0	2	28	128	1.01639	1.12042	0.994942	NA
X2019-04-Spring	32	2019-05-16	12:22:00	APICR25C-Split	NA	E	-3.363	0.005	20.211	0.012	-18.3512	-0.19	-14.255	-14.729	-36.141	8.884	-0.526	0.011	-8.063	37.965	0	2	28	128	1.01639	1.12042	1.01163	NA
X2019-04-Spring	36	2019-05-17	11:37:00	Tank+DI-Split3-25C	NA	E	-2.941	0.006	38.316	0.011	-0.930498	0.814	3.222	3.921	7.057	2.944	-0.089	0.011	0.6	-4.238	0	2	28	128	1.01639	1.12042	1.00776	NA
X2019-04-Spring	52	2019-05-22	17:30:00	2xEV-2-25C	NA	E	-9.925	0.006	69.53	0.012	29.1037	-4.697	33.335	28.239	83.199	-0.528	0.477	0.01	14.438	-58.164	0	2	28	128	1.01639	1.12042	0.998846	NA
X2019-04-Spring	58	2019-05-24	11:48:00	APICR25C-Split	NA	E	-2.949	0.006	21.252	0.01	-17.3495	0.233	-13.25	-13.295	-33.7	7.036	-0.51	0.012	-7.575	33.524	0	2	28	128	1.01639	1.12042	0.993444	NA
X2019-04-Spring	64	2019-05-27	15:00:00	MDIW25C	NA	E	-9.564	0.005	31.461	0.009	-7.52639	-5.627	-3.409	-9.563	-9.768	8.704	-0.43	0.009	-2.982	21.623	0	2	28	128	1.01639	1.12042	0.985101	NA
X2019-04-Spring	68	2019-05-28	13:41:00	EVAP25C	NA	E	-9.844	0.005	47.065	0.01	7.48781	-5.367	11.652	5.776	28.138	6.244	-0.075	0.012	4.591	-10.738	0	2	28	128	1.01639	1.12042	0.977429	NA
X2019-04-Spring	76	2019-05-30	11:08:00	2xEV-25C	NA	E	-9.738	0.006	69.907	0.012	29.4664	-4.509	33.7	28.793	84.466	-0.654	0.474	0.011	14.908	-59.125	0	2	28	128	1.01639	1.12042	0.982488	NA
X2019-04-Spring	91	2019-06-04	14:07:00	APICR-25C	NA	E	-2.864	0.006	21.252	0.01	-17.3495	0.313	-13.249	-13.193	-33.904	5.502	-0.49	0.009	-7.786	31.861	0	2	28	128	1.01639	1.12042	1.01132	NA
X2019-04-Spring	93	2019-06-05	09:40:00	MDIW-25C	NA	E	-10.134	0.006	32.026	0.009	-6.98275	-6.142	-2.865	-9.572	-5.69	6.972	-0.44	0.011	0.033	19.339	1	2	28	128	1.01639	1.12042	0.975153	NA
X2019-04-Spring	103	2019-06-07	12:27:00	EVAP-25C	NA	E	-9.885	0.005	47.337	0.012	7.74952	-5.396	11.914	5.971	29.087	3.465	-0.105	0.01	4.997	-13.942	0	2	28	128	1.01639	1.12042	0.942253	NA
X2019-04-Spring	109	2019-06-10	17:31:00	2xEV-25C	NA	E	-10.022	0.006	69.225	0.011	28.8102	-4.799	33.041	27.842	83.421	0.238	0.475	0.012	15.224	-56.813	0	2	28	128	1.01639	1.12042	1.00635	NA
X2019-04-Spring	115	2019-06-12	11:55:00	MDIW-25C	NA	E	-10.369	0.006	31.538	0.011	-7.4523	-6.378	-3.337	-10.3	-9.47	6.395	-0.465	0.01	-2.827	19.96	0	2	28	128	1.01639	1.12042	0.967232	NA
X2019-04-Spring	126	2019-06-17	09:50:00	EVAP-25C	NA	E	-9.815	0.006	47.017	0.013	7.44162	-5.341	11.606	5.794	28.439	4.083	-0.038	0.012	4.976	-12.802	0	2	28	128	1.01639	1.12042	1.0146	NA
X2019-04-Spring	129	2019-06-17	15:58:00	APICR	NA	E	-2.758	0.005	21.657	0.011	-16.9598	0.426	-12.858	-12.772	-32.974	6.195	-0.57	0.011	-7.618	31.644	0	3	129	167	1.02473	1.16446	0.992158	NA
X2019-04-Spring	136	2019-06-19	09:48:00	MDIW-25C-split	NA	E	-10.359	0.006	31.434	0.011	-7.55237	-6.373	-3.436	-10.413	-9.414	3.753	-0.486	0.012	-2.571	17.476	0	3	129	167	1.02473	1.16446	1.01548	NA
X2019-04-Spring	142	2019-06-20	13:50:00	2XEV-25C	NA	E	-10.249	0.005	68.784	0.009	28.3859	-5.026	32.615	27.173	82.946	0.463	0.467	0.01	15.617	-55.604	0	3	129	167	1.02473	1.16446	0.992086	NA
X2019-04-Spring	149	2019-06-24	12:00:00	Evap-25C	NA	E	-9.805	0.005	46.931	0.011	7.35887	-5.335	11.523	5.677	28.978	2.016	-0.081	0.01	5.668	-14.682	0	3	129	167	1.02473	1.16446	1.00242	NA
X2019-04-Spring	158	2019-06-26	10:40:00	MDIW-25C-split	NA	E	-10.364	0.006	31.573	0.009	-7.41862	-6.373	-3.303	-10.307	-9.198	6.287	-0.512	0.011	-2.62	19.777	0	3	129	167	1.02473	1.16446	0.986012	NA
X2019-04-Spring	164	2019-06-27	17:05:00	APICR-25C-split	NA	E	-2.679	0.006	22.022	0.01	-16.6086	0.512	-12.506	-12.356	-32.287	7.693	-0.588	0.01	-7.621	32.359	0	3	129	167	1.02473	1.16446	0.962645	NA
X2019-04-Spring	169	2019-07-29	17:05:00	2xEV-25C-13	NA	E	-10.095	0.008	68.63	0.02	28.2377	-4.887	32.467	27.413	87.293	-25.612	0.696	0.011	19.986	-80.097	48	4	168	197	1.02335	0.935498	1.03728	NA
X2019-04-Spring	171	2019-07-30	12:30:00	MDIW-25C-13	NA	E	-9.785	0.011	31.027	0.011	-7.94399	-5.848	-3.828	-10.016	-7.725	-10.51	-0.244	0.009	-0.084	3.229	0	4	168	197	1.02335	0.935498	1.00716	NA
X2019-04-Spring	177	2019-07-31	16:10:00	2xEV-25C-13-b	NA	E	-9.865	0.005	69.254	0.014	28.8381	-4.65	33.07	28.206	86.728	-14.418	0.649	0.01	18.267	-70.831	0	4	168	197	1.02335	0.935498	0.969438	NA
X2019-04-Spring	184	2019-08-02	16:20:00	Evap-25C-19	NA	E	-9.851	0.006	46.4	0.012	6.84794	-5.395	11.01	5.375	27.992	-1.136	0.18	0.009	5.724	-16.739	0	4	168	197	1.02335	0.935498	1.05789	NA
X2019-04-Spring	185	2019-08-06	17:00:00	MDIW-25C15	NA	E	-10.286	0.008	32.067	0.016	-6.9433	-6.283	-2.825	-9.486	-6.661	-1.597	-0.246	0.009	-1.024	8.952	0	4	168	197	1.02335	0.935498	0.991916	NA
X2019-04-Spring	191	2019-08-08	11:59:00	2xEV-5_25C	NA	E	-9.947	0.009	69.219	0.012	28.8044	-4.729	33.035	28.098	85.815	-8.192	0.658	0.011	17.479	-64.821	0	4	168	197	1.02335	0.935498	0.981337	NA
X2019-04-Spring	195	2019-08-09	11:17:00	SBD-Evap-25C1	NA	E	-10.431	0.007	38.817	0.01	-0.448435	-6.193	3.689	-2.92	9.594	1.349	-0.134	0.009	2.186	0.738	0	4	168	197	1.02335	0.935498	0.943065	NA
X2019-04-Spring	200	2019-08-12	16:08:00	MDIW-25C6	NA	E	-10.281	0.008	31.895	0.014	-7.1088	-6.284	-2.991	-9.746	-6.914	-0.343	-0.343	0.011	-0.947	12.34	0	5	198	236	1.03859	1.07565	1.05447	NA
X2019-04-Spring	203	2019-08-14	09:11:00	SBD-2xEVnew-25C7	NA	E	-10.468	0.008	44.457	0.01	4.97838	-6.039	9.133	2.633	23.415	0.28	-0.057	0.011	4.974	-11.062	0	5	198	236	1.03859	1.07565	1.01738	NA
X2019-04-Spring	204	2019-08-14	12:25:00	MDIW-25C	NA	E	-10.22	0.007	32.21	0.013	-6.8057	-6.216	-2.688	-9.452	-7.493	7.526	-0.417	0.01	-2.136	19.624	0	5	198	236	1.03859	1.07565	0.969677	NA
X2019-04-Spring	207	2019-08-15	10:36:00	EVAP-25C	NA	E	-10.464	0.006	48	0.011	8.38746	-5.917	12.553	6.139	32.022	1.993	-0.018	0.01	6.591	-16.059	0	5	198	236	1.03859	1.07565	0.963258	NA
X2019-04-Spring	210	2019-08-15	16:45:00	APICR-25C	NA	E	-2.489	0.007	22.516	0.014	-16.1333	0.707	-12.028	-11.575	-30.915	5.94	-0.474	0.01	-7.175	29.373	0	5	198	236	1.03859	1.07565	0.96778	NA
X2019-04-Spring	228	2019-08-22	09:39:00	SBD-2xEVnew-25C1	NA	E	-10.524	0.007	44.122	0.014	4.65605	-6.103	8.809	2.264	35.516	-48.459	-0.044	0.011	17.509	-58.591	48	5	198	236	1.03859	1.07565	1.04084	NA
X2019-04-Spring	235	2019-08-23	13:59:00	2XEV-25C	NA	E	-9.85	0.007	69.096	0.013	28.6861	-4.641	32.917	27.979	85.318	0.228	0.564	0.01	17.247	-56.758	0	5	198	236	1.03859	1.07565	0.978234	NA
X2019-04-Spring	240	2019-08-27	09:10:00	MDIW-25C7	NA	E	-10.487	0.008	31.74	0.013	-7.25794	-6.482	-3.141	-10.118	-7.53	2.066	-0.366	0.011	-1.265	15.295	0	6	237	304	0.999134	1.06277	1.00762	NA
X2019-04-Spring	248	2019-08-28	17:12:00	SBD-2XEV25CSplit	NA	E	-10.415	0.007	44.253	0.013	4.78209	-5.996	8.936	2.427	22.961	5.143	-0.115	0.01	4.92	-5.92	0	6	237	304	0.999134	1.06277	0.962654	NA
X2019-04-Spring	254	2019-08-30	10:20:00	SBD-Evap-old-25C6	NA	E	-10.522	0.01	47.597	0.014	7.9997	-5.985	12.164	5.737	31.97	-0.273	0.031	0.01	7.315	-17.471	0	6	237	304	0.999134	1.06277	1.0305	NA
X2019-04-Spring	260	2019-09-03	17:40:00	SBD-MDIW-25C5	NA	E	-10.84	0.006	31.861	0.011	-7.14151	-6.809	-3.026	-10.287	-7.777	3.392	-0.311	0.01	-1.745	16.764	0	6	237	304	0.999134	1.06277	1.06655	NA
X2019-04-Spring	266	2019-09-05	10:11:00	SBD-2xEV-25C1	NA	E	-10.428	0.008	45.01	0.015	5.51048	-5.983	9.667	3.213	24.934	4.531	-0.057	0.013	5.401	-7.95	0	6	237	304	0.999134	1.06277	1.00207	NA
X2019-04-Spring	277	2019-09-09	14:13:00	SBD-MDIW25C	NA	E	-10.816	0.007	30.764	0.014	-8.19705	-6.824	-4.085	-11.427	-10.467	3.053	-0.404	0.013	-2.334	18.56	0	6	237	304	0.999134	1.06277	1.00051	NA
X2019-04-Spring	284	2019-09-11	16:20:00	SBD-NB-Evap-25C5	NA	E	-10.826	0.006	38.875	0.011	-0.392627	-6.561	3.744	-3.451	9.901	4.39	-0.338	0.011	2.38	4.065	0	6	237	304	0.999134	1.06277	0.878419	NA
X2019-04-Spring	292	2019-09-13	14:45:00	SBD-NB-evap25C	NA	E	-10.822	0.007	39.238	0.009	-0.0433482	-6.545	4.095	-3.014	10.63	4.053	-0.26	0.01	2.404	3.022	0	6	237	304	0.999134	1.06277	0.946049	NA
X2019-04-Spring	300	2019-09-16	12:45:00	SBD-2XEV25C	NA	E	-10.459	0.006	45.443	0.011	5.92711	-5.998	10.085	3.646	26.618	2.121	-0.017	0.01	6.219	-11.12	0	6	237	304	0.999134	1.06277	1.03183	NA
X2019-04-Spring	306	2019-11-05	17:45:00	SBD-NB-MDIW-25C2	NA	E	-10.834	0.007	33.121	0.009	-5.92914	-6.761	-1.809	-8.652	-2.158	347.283	0.091	0.013	1.462	361.9	1	7	306	332	1.08935	1.23034	1.57439	NA
X2019-04-Spring	308	2019-11-06	13:13:00	SBD-2xEV-25C-3	NA	E	-10.488	0.006	44.948	0.01	5.45082	-6.041	9.608	2.854	23.657	-5.304	-0.296	0.01	4.267	-17.488	0	7	306	332	1.08935	1.23034	0.922847	NA
X2019-04-Spring	310	2019-11-06	17:25:00	SBD-NB-Evap-25C4	NA	E	-10.982	0.006	38.501	0.012	-0.752491	-6.72	3.383	-4.077	8.269	-15.924	-0.447	0.009	1.482	-15.379	0	7	306	332	1.08935	1.23034	0.896882	NA
X2019-04-Spring	313	2019-11-08	10:30:00	SBD-NB-MDIW-25C1	NA	E	-10.875	0.365	32.951	1.225	-6.09271	-6.806	-1.974	-9.416	-4.732	-122.589	-0.471	0.099	-0.809	-112.08	0	7	306	332	1.08935	1.23034	0.977446	NA
X2019-04-Spring	315	2019-11-08	14:20:00	SBD-NB-2xEV-25C-5	NA	E	-10.904	0.009	72.206	0.012	31.6785	-5.528	35.916	29.687	107.89	3186.14	0.294	0.011	32.399	2928.95	48	7	306	332	1.08935	1.23034	1.02926	NA
X2019-04-Spring	318	2019-11-14	13:10:00	SBDNB-MDIW-25C9	NA	E	-10.84	0.007	33.344	0.01	-5.71457	-6.76	-1.594	-8.89	-3.177	340.23	-0.362	0.022	0.009	354.19	0	7	306	332	1.08935	1.23034	1.08567	NA
X2019-04-Spring	320	2019-11-14	17:10:00	SBD-2xEV-25C-10	NA	E	-10.96	0.007	71.712	0.017	31.2032	-5.595	35.439	29.173	89.557	824.147	0.318	0.01	16.25	713.754	0	7	306	332	1.08935	1.23034	1.06568	NA
X2019-04-Spring	322	2019-11-15	12:35:00	SBD-NB-Evap-25C2	NA	E	-10.894	0.005	38.329	0.012	-0.91799	-6.643	3.217	-4.063	8.644	447.232	-0.35	0.011	2.186	448.384	0	7	306	332	1.08935	1.23034	1.00227	NA
X2019-04-Spring	325	2019-11-18	10:50:00	SBD-NB-MDIW-25C7	NA	E	-10.756	0.006	33.46	0.011	-5.60295	-6.677	-1.482	-8.567	11.206	-3927.65	-0.233	0.01	14.21	-3957.25	48	7	306	332	1.08935	1.23034	1.21974	NA
X2019-04-Spring	331	2019-11-19	14:10:00	SBDNB-2xEv-25C-2	NA	E	-10.973	0.006	71.649	0.012	31.1426	-5.611	35.379	29.215	98.419	-72.658	0.433	0.009	24.636	-128.665	48	7	306	332	1.08935	1.23034	1.19012	NA
X2019-04-Spring	333	2019-12-05	11:00:00	SBD-NB-Evap-25C11	NA	E	-10.711	0.006	38.587	0.02	-0.669742	-6.463	3.467	-3.357	10.167	114.851	-0.074	0.011	3.2	114.978	0	8	333	371	1.00313	1.13758	1.18458	NA
X2019-04-Spring	335	2019-12-05	15:10:00	SBD-MDIW-25C6	NA	E	-10.741	0.005	32.229	0.024	-6.78742	-6.704	-2.67	-9.963	-5.42	39.296	-0.444	0.011	-0.088	52.289	0	8	333	371	1.00313	1.13758	0.910298	NA
X2019-04-Spring	337	2019-12-06	15:15:00	SBD-2xEV-25C6	NA	E	-10.366	0.007	45.545	0.034	6.02526	-5.907	10.184	3.591	24.181	-2.444	-0.261	0.009	3.634	-15.909	0	8	333	371	1.00313	1.13758	0.895105	NA
X2019-04-Spring	341	2019-12-09	15:30:00	SBD-NB-EVAP-25C7	NA	E	-10.856	0.006	39.073	0.022	-0.202111	-6.583	3.936	-3.432	8.891	-28.526	-0.483	0.009	0.996	-29.182	0	8	333	371	1.00313	1.13758	0.7754	NA
X2019-04-Spring	347	2019-12-11	11:25:00	SBD-NB-MDIW-25C	NA	E	-11.073	0.008	32.867	0.048	-6.17354	-6.994	-2.056	-9.596	-4.904	-12.213	-0.377	0.012	-0.801	-0.762	0	8	333	371	1.00313	1.13758	0.972126	NA
X2019-04-Spring	354	2019-12-12	17:18:00	SBD-2xEV-25C	NA	E	-10.841	0.006	72.232	0.027	31.7035	-5.467	35.942	29.558	85.377	-15.103	0.082	0.009	11.369	-75.716	0	8	333	371	1.00313	1.13758	0.85838	NA
X2019-04-Spring	358	2019-12-16	15:30:00	SBD-NB-MDIW-25C2	NA	E	-10.931	0.006	32.47	0.011	-6.55553	-6.874	-2.438	-9.749	-5.669	-21.965	-0.28	0.01	-0.803	-10.01	1	8	333	371	1.00313	1.13758	1.07167	NA
X2019-04-Spring	363	2019-12-18	12:35:00	SBDNB-EVAP-25C2	NA	E	-10.699	0.005	38.29	0.023	-0.955515	-6.462	3.18	-3.771	7.456	6.88	-0.209	0.012	1.078	7.558	0	8	333	371	1.00313	1.13758	1.05523	NA
X2019-04-Spring	366	2019-12-19	09:24:00	SBDNB-MDIW-25C1	NA	E	-10.8	0.006	72.296	0.023	31.7651	-5.426	36.004	29.954	86.113	48.12	0.365	0.01	11.934	-16.543	0	8	333	371	1.00313	1.13758	1.13646	NA
X2019-04-Spring	371	2019-12-20	09:30:00	SBDNB-MDIW-25C1	NA	E	-10.962	0.005	32.452	0.023	-6.57285	-6.904	-2.456	-9.731	-5.167	35.397	-0.213	0.01	-0.264	48.124	0	8	333	371	1.00313	1.13758	1.13862	NA
X2019-04-Spring	357	2017-12-16	13:25:00	DB-PICA-HG21	NA	H	5.458	0.007	36.588	0.01	-2.59318	8.632	1.572	10.367	4.683	175.32	-0.098	0.016	1.533	161.015	1	8	333	371	1.00313	1.13758	0.959247	NA
X2019-04-Spring	1	2019-04-05	17:05:00	2xEVHG	NA	H	-10.353	0.006	66.158	0.013	25.8591	-5.21	30.079	24.054	76.753	-1.238	0.031	0.008	14.787	-52.461	1	1	1	27	0.986339	1.04301	0.552414	NA
X2019-04-Spring	4	2019-04-08	14:04:00	EvapHG-b	NA	H	-10.522	0.006	43.185	0.011	3.75446	-6.132	7.906	0.35	19.15	4.048	-1.042	0.011	3.224	-4.861	0	1	1	27	0.986339	1.04301	0.0786144	NA
X2019-04-Spring	11	2019-04-12	14:11:00	2XEV-HG-c	NA	H	-9.961	0.004	67.18	0.01	26.8425	-4.808	31.067	25.785	78.801	-1.194	0.362	0.01	14.77	-54.608	1	1	1	27	0.986339	1.04301	0.836206	NA
X2019-04-Spring	14	2019-04-15	11:56:00	OoidsHG	NA	H	5.29	0.006	37.401	0.014	-1.81091	8.502	2.356	10.33	8.172	-8.35	-0.771	0.009	3.438	-21.792	0	1	1	27	0.986339	1.04301	0.0998049	NA
X2019-04-Spring	16	2019-04-23	11:03:00	SBD-HG	NA	H	-10.524	0.006	30.172	0.011	-8.76667	-6.57	-4.655	-12.647	-12.602	4.808	-1.339	0.006	-3.345	21.213	0	1	1	27	0.986339	1.04301	0.106179	NA
X2019-04-Spring	22	2019-05-09	15:56:00	MDIW-HG	NA	H	-9.963	0.005	30.307	0.008	-8.63677	-6.039	-4.524	-11.954	-11.904	4.649	-1.318	0.012	-2.904	20.205	0	1	1	27	0.986339	1.04301	0.109802	NA
X2019-04-Spring	28	2019-05-15	10:14:00	SBD-HG-Split	NA	H	-10.549	0.006	30.254	0.011	-8.68777	-6.591	-4.576	-12.643	-12.833	7.875	-1.391	0.007	-3.737	24.193	0	2	28	128	1.01639	1.12042	0.0823366	NA
X2019-04-Spring	42	2019-05-20	14:38:00	EVAP-HG	NA	H	-9.693	0.006	43.483	0.011	4.0412	-5.345	8.195	1.478	19.177	2.62	-1.014	0.01	2.677	-7.673	0	2	28	128	1.01639	1.12042	0.126286	NA
X2019-04-Spring	48	2019-05-21	17:48:00	2XEV-HG	NA	H	-9.883	0.005	60.031	0.012	19.9637	-4.972	24.167	17.845	59.584	2.974	-0.64	0.01	10.169	-37.891	0	2	28	128	1.01639	1.12042	0.11323	NA
X2019-04-Spring	57	2019-05-24	09:41:00	SBD-HG-Split3	NA	H	-10.45	0.006	30.546	0.012	-8.40681	-6.488	-4.294	-12.212	-12.097	6.598	-1.34	0.01	-3.558	22.215	0	2	28	128	1.01639	1.12042	0.123819	NA
X2019-04-Spring	60	2019-05-24	15:44:00	EVAP-HG	NA	H	-9.697	0.006	41.71	0.01	2.33521	-5.408	6.484	-0.315	14.683	5.817	-1.073	0.01	1.652	-1.115	0	2	28	128	1.01639	1.12042	0.109392	NA
X2019-04-Spring	66	2019-05-28	09:40:00	2XEV-HG	NA	H	-9.874	0.006	62.314	0.012	22.1604	-4.888	26.371	20.112	65.27	2.074	-0.615	0.011	11.232	-42.89	0	2	28	128	1.01639	1.12042	0.0841791	NA
X2019-04-Spring	73	2019-05-29	14:35:00	MDIW-HG	NA	H	-9.951	0.005	30.507	0.009	-8.44433	-6.022	-4.331	-11.796	-12.234	7.269	-1.366	0.012	-3.623	22.458	0	2	28	128	1.01639	1.12042	0.0873989	NA
X2019-04-Spring	79	2019-05-30	17:45:00	2xEV-HG	NA	H	-10.683	0.006	62.451	0.013	22.2922	-5.642	26.501	19.418	65.759	1.744	-0.637	0.011	11.44	-42.669	0	2	28	128	1.01639	1.12042	0.0784906	NA
X2019-04-Spring	82	2019-05-31	13:21:00	EVAP-HG	NA	H	-9.735	0.006	44.004	0.01	4.54251	-5.367	8.698	1.941	20.483	4.062	-1.021	0.01	2.96	-7.198	0	2	28	128	1.01639	1.12042	0.108048	NA
X2019-04-Spring	97	2019-06-05	05:56:00	SBD-HG	NA	H	-10.687	0.005	29.433	0.012	-9.47774	-6.748	-5.369	-13.599	-14.355	6.528	-1.413	0.01	-3.686	24.6	0	2	28	128	1.01639	1.12042	0.0829421	NA
X2019-04-Spring	99	2019-06-06	12:28:00	2xEV-HG	NA	H	-10.806	0.007	62.313	0.011	22.1595	-5.762	26.368	19.184	66.008	-2.601	-0.615	0.012	11.939	-46.456	0	2	28	128	1.01639	1.12042	0.106473	NA
X2019-04-Spring	111	2019-06-11	12:40:00	Evap-HG	NA	H	-9.74	0.007	44.402	0.014	4.92546	-5.358	9.082	2.3	22.732	2.276	-1.045	0.012	4.406	-9.713	0	2	28	128	1.01639	1.12042	0.0750306	NA
X2019-04-Spring	118	2019-06-12	18:00:00	MDIW-HG	NA	H	-10.818	0.005	28.666	0.011	-10.2157	-6.896	-6.109	-14.55	-14.216	8.213	-1.491	0.011	-2.06	27.982	1	2	28	128	1.01639	1.12042	0.0265094	NA
X2019-04-Spring	123	2019-06-14	11:10:00	2XEV-HG	NA	H	-10.628	0.006	62.821	0.01	22.6483	-5.578	26.858	19.872	67.225	1.738	-0.601	0.011	12.127	-43.395	0	2	28	128	1.01639	1.12042	0.104174	NA
X2019-04-Spring	132	2019-06-18	11:35:00	SBD-HG	NA	H	-10.516	0.006	29.816	0.011	-9.10921	-6.574	-4.999	-13.06	-13.461	6.422	-1.412	0.011	-3.523	23.554	0	3	129	167	1.02473	1.16446	0.136999	NA
X2019-04-Spring	139	2019-06-19	16:10:00	MDIW-HG-split	NA	H	-10.773	0.005	28.753	0.01	-10.132	-6.851	-6.025	-14.409	-16.272	6.611	-1.478	0.008	-4.31	26.128	0	3	129	167	1.02473	1.16446	0.105256	NA
X2019-04-Spring	147	2019-06-21	16:50:00	Evap-HG	NA	H	-9.701	0.005	41.944	0.01	2.56037	-5.404	6.709	-0.106	15.867	4.768	-1.087	0.01	2.371	-2.601	0	3	129	167	1.02473	1.16446	0.125401	NA
X2019-04-Spring	155	2019-06-25	13:56:00	MDIW_HG	NA	H	-10.634	0.005	29.152	0.011	-9.74812	-6.707	-5.64	-13.931	-16.008	8.008	-1.524	0.011	-4.814	26.611	0	3	129	167	1.02473	1.16446	0.0454017	NA
X2019-04-Spring	163	2019-06-27	14:40:00	2xEV-HG	NA	H	-10.019	0.007	63.079	0.19	22.8965	-4.999	27.109	20.64	102.191	-107.118	-0.689	0.021	44.778	-148.285	48	3	129	167	1.02473	1.16446	-0.0186933	NA
X2019-04-Spring	167	2019-06-28	15:49:00	2xEV-HG	NA	H	-9.898	0.005	62.462	0.015	22.3028	-4.906	26.514	20.245	67.057	1.624	-0.603	0.01	12.647	-43.563	0	3	129	167	1.02473	1.16446	0.0799421	NA
X2019-04-Spring	168	2019-07-29	14:40:00	MDIW-HG-7	NA	H	-10.277	0.02	29.755	0.021	-9.16791	-6.352	-5.057	-12.174	-10.003	-14.858	-0.69	0.046	0.087	1.787	1	4	168	197	1.02335	0.935498	0.604468	NA
X2019-04-Spring	170	2019-07-30	09:43:00	EvapHG-2	NA	H	-39.369	0.007	40.248	0.013	0.928476	-33.281	5.009	-31.222	13.74	-5.645	-1.683	0.011	3.659	20.868	0	4	168	197	1.02335	0.935498	0.062497	NA
X2019-04-Spring	174	2019-07-31	09:34:00	2xEV-HG-3	NA	H	-10.461	0.006	67.465	0.013	27.1167	-5.268	31.341	24.9	80.644	-8.397	-0.285	0.009	15.962	-61.454	0	4	168	197	1.02335	0.935498	0.0959323	NA
X2019-04-Spring	181	2019-08-02	09:58:00	MDIW-HG-10	NA	H	-10.438	0.007	27.757	0.013	-11.0904	-6.57	-6.986	-14.775	-17.7	-1.18	-1.191	0.01	-3.83	19.815	0	4	168	197	1.02335	0.935498	0.156522	NA
X2019-04-Spring	186	2019-08-07	09:38:00	Evap-HG3	NA	H	-39.212	0.006	43.371	0.011	3.93343	-33.03	8.024	-28.016	20.114	-0.511	-1.59	0.009	3.937	19.839	0	4	168	197	1.02335	0.935498	0.0778523	NA
X2019-04-Spring	190	2019-08-08	09:18:00	MDIW-HG1-7/12	NA	H	-10.352	0.006	30.809	0.011	-8.15375	-6.387	-4.04	-11.69	-10.731	1.239	-1.166	0.011	-2.689	16.153	0	4	168	197	1.02335	0.935498	0.105302	NA
X2019-04-Spring	197	2019-08-09	17:05:00	2xEV-HG-3	NA	H	-10.519	0.008	67.255	0.015	26.9147	-5.329	31.138	24.628	80.087	-7.04	-0.294	0.007	15.839	-59.744	0	4	168	197	1.02335	0.935498	0.0934938	NA
X2019-04-Spring	201	2019-08-12	18:15:00	DB-Pica--HG17	NA	H	5.192	0.006	38.335	0.009	-0.912216	8.441	3.257	11.251	7.925	1.107	-0.681	0.012	1.391	-14.141	0	5	198	236	1.03859	1.07565	0.136697	NA
X2019-04-Spring	215	2019-08-16	17:00:00	MDIW-HG	NA	H	-10.137	0.006	29.915	0.013	-9.01396	-6.216	-4.903	-12.554	-13.172	6.03	-1.367	0.01	-3.425	22.567	0	5	198	236	1.03859	1.07565	0.066745	NA
X2019-04-Spring	222	2019-08-20	14:45:00	SBD-Evap-HG2	NA	H	-10.507	0.007	35.904	0.012	-3.25133	-6.362	0.878	-6.882	1.575	5.796	-1.182	0.01	-0.18	10.92	0	5	198	236	1.03859	1.07565	0.105791	NA
X2019-04-Spring	229	2019-08-22	11:41:00	DB-Pica--HG7	NA	H	5.566	0.009	39.251	0.017	-0.0308395	8.823	4.142	12.506	10.023	3.054	-0.698	0.011	1.709	-14.33	0	5	198	236	1.03859	1.07565	0.0851671	NA
X2019-04-Spring	238	2019-08-26	12:49:00	2XEV-HG-Split3	NA	H	-10.388	0.008	66.043	0.014	25.7485	-5.246	29.968	23.647	77.913	-1.858	-0.223	0.01	16.099	-52.811	xx	6	237	304	0.999134	1.06277	0.354494	NA
X2019-04-Spring	242	2019-08-27	13:31:00	MDIW-HG6	NA	H	-10.516	0.016	25.945	0.033	-12.8339	-6.704	-8.736	-16.835	-22.336	1.016	-1.411	0.01	-5.028	25.753	0	6	237	304	0.999134	1.06277	0.121871	NA
X2019-04-Spring	251	2019-08-29	13:35:00	Evap-HG4	NA	H	-10.436	0.007	35.677	0.015	-3.46975	-6.303	0.659	-7.073	1.012	5.288	-1.22	0.011	-0.306	10.779	0	6	237	304	0.999134	1.06277	0.0825704	NA
X2019-04-Spring	259	2019-09-03	15:20:00	2xEV-HG9	NA	H	-10.756	0.013	57.102	0.022	17.1454	-5.888	21.338	14.301	55.981	-3.86	-0.459	0.01	12.318	-38.296	xx	6	237	304	0.999134	1.06277	0.339027	NA
X2019-04-Spring	262	2019-09-04	11:35:00	SBD-MDIW-HG1	NA	H	-10.447	0.007	28.858	0.013	-10.031	-6.542	-5.924	-13.911	-15.446	6.21	-1.394	0.012	-3.677	25.173	0	6	237	304	0.999134	1.06277	0.0699245	NA
X2019-04-Spring	271	2019-09-06	11:33:00	DB-Pica-HG	NA	H	4.084	0.006	36.184	0.011	-2.98191	7.33	1.179	7.891	2.412	2.71	-0.832	0.012	0.053	-7.364	0	6	237	304	0.999134	1.06277	0.117464	NA
X2019-04-Spring	280	2019-09-10	11:20:00	SBD-Evap-HG	NA	H	-10.534	0.007	34.831	0.014	-4.28377	-6.423	-0.158	-8.01	-1.13	4.274	-1.236	0.011	-0.814	11.512	0	6	237	304	0.999134	1.06277	0.0886737	NA
X2019-04-Spring	290	2019-09-13	09:30:00	SBD-MDIW-HG	NA	H	-10.459	0.005	28.352	0.01	-10.5179	-6.57	-6.412	-14.386	-17.412	4.41	-1.364	0.01	-4.689	24.359	0	6	237	304	0.999134	1.06277	0.111096	NA
X2019-04-Spring	294	2019-09-14	09:23:00	2xEV-HG1	NA	H	-10.469	0.006	68.366	0.008	27.9837	-5.246	32.21	25.777	85.356	-2.014	-0.281	0.012	18.675	-56.996	xy	6	237	304	0.999134	1.06277	0.24633	NA
X2019-04-Spring	304	2019-09-17	12:20:00	SBD-Evap-HG1	NA	H	-1.129	0.007	40.402	0.013	1.07665	2.583	5.239	7.635	13.643	-0.098	-0.193	0.011	3.105	-13.029	1	6	237	304	0.999134	1.06277	0.761945	NA
X2019-04-Spring	307	2019-11-06	10:45:00	2-SBD-MDIW-HG	NA	H	-10.549	0.005	28.215	0.011	-10.6497	-6.659	-6.544	-14.656	-16.247	20.065	-1.415	0.01	-3.244	40.696	0	7	306	332	1.08935	1.23034	0.0538298	NA
X2019-04-Spring	309	2019-11-06	15:10:00	SBD-Evap-HG-8	NA	H	-10.584	0.006	33.994	0.009	-5.08913	-6.498	-0.966	-9.066	-3.003	-14.282	-1.429	0.011	-1.073	-5.52	0	7	306	332	1.08935	1.23034	-0.0731459	NA
X2019-04-Spring	312	2019-11-07	14:20:00	SBD-2xEV-HG1	NA	H	-10.396	0.006	42.582	0.011	3.17425	-6.034	7.323	-0.177	17.722	292.624	-1.104	0.009	2.978	282.475	0	7	306	332	1.08935	1.23034	0.103232	NA
X2019-04-Spring	314	2019-11-08	12:15:00	DB-PICA-HG14	NA	H	4.58	0.007	39.776	0.009	0.474316	7.916	4.646	11.807	10.984	104.41	-0.954	0.012	1.655	85.237	0	7	306	332	1.08935	1.23034	0.0271159	NA
X2019-04-Spring	317	2019-11-11	10:00:00	SBD-Evap-HG9	NA	H	-10.378	0.006	35.516	0.011	-3.62466	-6.254	0.503	-7.046	1.197	132.257	-1.091	0.013	0.19	138.729	0	7	306	332	1.08935	1.23034	0.254681	NA
X2019-04-Spring	321	2019-11-15	10:05:00	SBD-2xEV-HG7	NA	H	-10.634	0.01	34.466	0.017	-4.63498	-6.529	-0.51	-8.319	-0.979	561.605	-1.092	0.009	0.042	574.128	0	7	306	332	1.08935	1.23034	0.279035	NA
X2019-04-Spring	323	2019-11-15	14:45:00	SBD-Evap-HG6	NA	H	-10.609	0.006	32.88	0.012	-6.16103	-6.559	-2.042	-10.07	-5.494	52.892	-1.321	0.009	-1.421	64.571	0	7	306	332	1.08935	1.23034	0.0645703	NA
X2019-04-Spring	327	2019-11-18	14:45:00	SBD-MDIW-HG9	NA	H	-10.563	0.006	27.011	0.011	-11.8082	-6.713	-7.706	-15.818	-19.891	-68.757	-1.388	0.012	-4.609	-47.68	0	7	306	332	1.08935	1.23034	0.106467	NA
X2019-04-Spring	332	2019-11-19	16:15:00	SBD-NB-2xEV-HG7	NA	H	-10.625	0.005	64.971	0.01	24.717	-5.504	28.933	21.844	74.797	-4.805	-0.729	0.008	15.201	-53.478	0	7	306	332	1.08935	1.23034	0.0716146	NA
X2019-04-Spring	334	2019-12-05	12:50:00	SBD-NB-Evap-HG5	NA	H	-10.363	0.006	36.137	0.024	-3.02714	-6.219	1.103	-6.474	2.303	-4.047	-1.14	0.013	0.096	0.43	0	8	333	371	1.00313	1.13758	0.160952	NA
X2019-04-Spring	336	2019-12-05	16:55:00	SBD-NB-MDIW-5	NA	H	-10.763	0.011	28.162	0.027	-10.7007	-6.862	-6.596	-14.966	-14.739	145.354	-1.467	0.02	-1.612	168.893	48	8	333	371	1.00313	1.13758	-0.0425389	NA
X2019-04-Spring	338	2019-12-06	17:20:00	DB-PICA-HG-14-B	NA	H	4.849	0.006	40.127	0.021	0.812049	8.18	4.986	12.402	11.993	77.203	-0.968	0.008	1.976	57.505	0	8	333	371	1.00313	1.13758	0.0566792	NA
X2019-04-Spring	340	2019-12-09	13:20:00	SBD-2xEV-HG-4	NA	H	-10.294	0.007	39.993	0.02	0.683114	-6.025	4.825	-2.558	12.858	51.223	-1.056	0.012	3.155	48.06	0	8	333	371	1.00313	1.13758	0.187788	NA
X2019-04-Spring	345	2019-12-10	15:50:00	SBD-NB-MDIW-HG3	NA	H	-10.921	0.005	28.033	0.023	-10.8248	-7.014	-6.721	-15.232	-16.315	-22.741	-1.456	0.01	-2.958	-2.247	0	8	333	371	1.00313	1.13758	-0.0276037	NA
X2019-04-Spring	349	2019-12-11	15:30:00	SBD-Evap-HG1-split	NA	H	-10.5	0.008	35.831	0.064	-3.32157	-6.357	0.807	-7.034	1.18	-5.594	-1.27	0.01	-0.434	-0.394	0	8	333	371	1.00313	1.13758	0.0387574	NA
X2019-04-Spring	359	2019-12-17	12:15:00	SBD-2xEV-HG2	NA	H	-10.448	0.009	37.951	0.022	-1.2817	-6.237	2.854	-3.862	6.897	31.591	-0.214	0.011	1.175	32.698	1	8	333	371	1.00313	1.13758	1.05155	NA
X2019-04-Spring	368	2019-12-19	13:05:00	SBD-EVAP-HG1	NA	H	-10.335	0.005	33.883	0.025	-5.19594	-6.268	-1.073	-8.665	-3.049	-20.737	-1.158	0.011	-0.907	-12.069	0	8	333	371	1.00313	1.13758	0.175026	NA
X2019-04-Spring	6	2019-04-11	13:03:00	Carrara	NA	C	1.819	0.005	36.7	0.013	-2.48542	5.224	1.672	6.541	3.782	1.402	-0.498	0.01	0.434	-7.407	0	1	1	27	0.986339	1.04301	0.462512	159.6
X2019-04-Spring	62	2019-05-27	11:13:00	Carrara	NA	C	1.886	0.005	36.796	0.013	-2.39304	5.29	1.764	6.57	3.107	3.468	-0.627	0.01	-0.424	-5.609	0	2	28	128	1.01639	1.12042	0.397305	251.2
X2019-04-Spring	90	2019-06-04	12:02:00	Carrara	NA	C	1.96	0.005	37.02	0.01	-2.17751	5.367	1.981	6.917	3.662	5.234	-0.575	0.011	-0.303	-4.364	0	2	28	128	1.01639	1.12042	0.441821	183.3
X2019-04-Spring	106	2019-06-10	10:45:00	Carrara	NA	C	1.809	0.006	36.633	0.011	-2.54988	5.212	1.607	6.365	3.021	3.052	-0.597	0.011	-0.195	-5.632	0	2	28	128	1.01639	1.12042	0.432721	195
X2019-04-Spring	134	2019-06-18	15:31:00	Carrara	NA	C	1.871	0.007	37.922	0.01	-1.30961	5.313	2.851	7.743	6.308	4.371	-0.553	0.011	0.594	-6.857	0	3	129	167	1.02473	1.16446	0.463788	158.3
X2019-04-Spring	152	2019-06-24	18:15:00	Carrara	NA	C	1.93	0.006	36.926	0.01	-2.26796	5.335	1.89	6.762	3.792	2.82	-0.606	0.011	0.008	-6.543	0	3	129	167	1.02473	1.16446	0.435576	191.3
X2019-04-Spring	166	2019-06-28	13:43:00	Carrara	NA	C	1.829	0.005	36.726	0.015	-2.4604	5.234	1.697	6.429	3.011	5.05	-0.644	0.012	-0.384	-3.851	0	3	129	167	1.02473	1.16446	0.405496	236.4
X2019-04-Spring	172	2019-07-30	14:41:00	Carrara	NA	C	1.837	0.008	36.839	0.01	-2.35167	5.245	1.806	6.823	5.695	-10.309	-0.372	0.011	2.071	-19.296	48	4	168	197	1.02335	0.935498	0.456945	165.6
X2019-04-Spring	188	2019-08-07	15:42:00	Carrara	NA	C	1.891	0.006	37.011	0.011	-2.18617	5.301	1.972	7.001	5.676	-3.336	-0.414	0.011	1.722	-12.765	0	4	168	197	1.02335	0.935498	0.409533	229.6
X2019-04-Spring	213	2019-08-16	12:24:00	Carrara	NA	C	1.907	0.007	36.969	0.019	-2.22658	5.315	1.932	6.853	4.708	1.732	-0.536	0.01	0.838	-7.682	0	5	198	236	1.03859	1.07565	0.405998	235.6
X2019-04-Spring	232	2019-08-22	17:52:00	Carrara-	NA	C	1.845	0.009	36.881	0.019	-2.31126	5.254	1.847	6.662	4.18	3.616	-0.58	0.012	0.481	-5.586	0	5	198	236	1.03859	1.07565	0.365456	323.9
X2019-04-Spring	257	2019-08-30	17:24:00	Carrara	NA	C	1.947	0.007	36.843	0.01	-2.34782	5.348	1.81	6.681	4.117	4.567	-0.622	0.009	0.491	-4.671	0	6	237	304	0.999134	1.06277	0.355807	352.6
X2019-04-Spring	274	2019-09-06	17:36:00	Carrara-	NA	C	1.924	0.006	37.063	0.012	-2.13614	5.334	2.022	6.914	4.823	4.491	-0.584	0.009	0.772	-5.145	0	6	237	304	0.999134	1.06277	0.388281	269
X2019-04-Spring	297	2019-09-14	15:39:00	Carrara	NA	C	1.919	0.006	36.902	0.01	-2.29105	5.324	1.867	6.785	4.281	2.915	-0.55	0.011	0.541	-6.394	0	6	237	304	0.999134	1.06277	0.425293	205.3
X2019-04-Spring	311	2019-11-07	11:58:00	Carrara	NA	C	1.911	0.006	36.892	0.012	-2.30067	5.316	1.857	6.646	4.536	160.458	-0.671	0.009	0.816	149.719	0	7	306	332	1.08935	1.23034	0.438552	187.4
X2019-04-Spring	326	2019-11-18	12:40:00	Carrara	NA	C	1.868	0.008	36.742	0.015	-2.445	5.271	1.712	6.59	4.356	2.93	-0.537	0.009	0.924	-6.021	0	7	306	332	1.08935	1.23034	0.585644	68.7
X2019-04-Spring	342	2019-12-10	09:30:00	Carrara	NA	C	1.877	0.005	36.895	0.029	-2.29779	5.285	1.86	6.609	3.776	-5.38	-0.678	0.01	0.051	-14.558	0	8	333	371	1.00313	1.13758	0.432541	195.3
X2019-04-Spring	23	2019-05-10	09:50:00	Ooids	NA	O	4.639	0.005	39.044	0.011	-0.230015	7.947	3.94	11.971	9.057	0.315	-0.132	0.008	1.152	-15.723	0	1	1	27	0.986339	1.04301	0.689608	24.7
X2019-04-Spring	53	2019-05-23	09:39:00	Ooids	NA	O	4.774	0.006	39.539	0.014	0.246275	8.089	4.418	12.556	12.803	-11.53	-0.168	0.013	3.913	-28.433	48	2	28	128	1.01639	1.12042	0.720027	14.8
X2019-04-Spring	86	2019-06-03	11:45:00	Ooids	NA	O	4.722	0.006	39.234	0.012	-0.047197	8.031	4.124	12.215	9.333	3.135	-0.157	0.011	1.059	-13.392	0	2	28	128	1.01639	1.12042	0.739399	8.9
X2019-04-Spring	95	2019-06-05	13:38:00	Ooids	NA	O	4.693	0.005	39.175	0.01	-0.103967	8.001	4.067	12.086	9.867	3.464	-0.199	0.011	1.703	-12.926	0	2	28	128	1.01639	1.12042	0.69981	21.3
X2019-04-Spring	114	2019-06-12	09:55:00	Ooids	NA	O	4.668	0.006	39.09	0.011	-0.185754	7.976	3.985	11.971	9.244	3.549	-0.205	0.01	1.248	-12.658	0	2	28	128	1.01639	1.12042	0.696474	22.4
X2019-04-Spring	145	2019-06-21	12:42:00	Ooids	NA	O	4.851	0.006	39.548	0.01	0.254934	8.162	4.427	12.619	10.13	4.243	-0.19	0.01	1.245	-13.025	0	3	129	167	1.02473	1.16446	0.706041	19.2
X2019-04-Spring	165	2019-06-28	10:00:00	Ooids	NA	O	4.632	0.007	38.96	0.012	-0.31084	7.937	3.859	11.771	8.917	3.804	-0.24	0.012	1.175	-12.123	0	3	129	167	1.02473	1.16446	0.677365	29.1
X2019-04-Spring	173	2019-07-30	17:04:00	Ooids	NA	O	4.738	0.006	39.413	0.01	0.125037	8.052	4.296	12.573	12.237	-10.743	0.006	0.01	3.595	-27.39	2	4	168	197	1.02335	0.935498	0.700621	21
X2019-04-Spring	196	2019-08-09	13:23:00	Ooids	NA	O	4.708	0.006	39.232	0.011	-0.0491214	8.018	4.122	12.311	10.349	-1.049	-0.047	0.008	2.072	-17.488	0	4	168	197	1.02335	0.935498	0.652906	38.3
X2019-04-Spring	218	2019-08-19	14:33:00	Ooids	NA	O	4.712	0.009	39.24	0.017	-0.0414238	8.022	4.13	12.284	10.606	0.832	-0.086	0.008	2.31	-15.658	0	5	198	236	1.03859	1.07565	0.726775	12.7
X2019-04-Spring	245	2019-08-28	09:04:00	Ooids	NA	O	4.8	0.007	39.377	0.013	0.0903979	8.108	4.262	12.479	10.759	0.895	-0.11	0.011	2.199	-15.94	0	6	237	304	0.999134	1.06277	0.730678	11.5
X2019-04-Spring	263	2019-09-04	14:05:00	Ooids	NA	O	4.785	0.006	39.373	0.01	0.0865491	8.094	4.258	12.419	10.966	2.671	-0.152	0.01	2.411	-14.172	0	6	237	304	0.999134	1.06277	0.690129	24.6
X2019-04-Spring	287	2019-09-12	12:19:00	Ooids	NA	O	4.814	0.007	39.438	0.013	0.149092	8.124	4.321	12.551	10.753	3.793	-0.114	0.014	2.074	-13.222	0	6	237	304	0.999134	1.06277	0.724984	13.2
X2019-04-Spring	305	2019-09-17	15:52:00	Ooids	NA	O	4.758	0.007	39.288	0.011	0.00476192	8.067	4.176	12.258	10.623	3.56	-0.202	0.011	2.234	-13.112	0	6	237	304	0.999134	1.06277	0.643967	41.9
X2019-04-Spring	316	2019-11-08	16:50:00	Ooids-old	NA	O	4.636	0.006	39.114	0.011	-0.162661	7.946	4.008	11.703	9.741	145.328	-0.462	0.012	1.695	126.817	0	7	306	332	1.08935	1.23034	0.565154	80
X2019-04-Spring	330	2019-11-19	12:10:00	Ooids-old	NA	O	4.747	0.006	39.34	0.008	0.0547964	8.058	4.226	12.658	11.492	-77.026	0.153	0.011	2.997	-92.439	1	7	306	332	1.08935	1.23034	1.21602	-73.2
X2019-04-Spring	351	2019-12-12	11:10:00	Ooids	NA	O	4.808	0.007	39.494	0.022	0.202975	8.12	4.375	12.433	9.809	-15.99	-0.28	0.012	1.031	-32.767	0	8	333	371	1.00313	1.13758	0.74638	6.9
X2019-04-Spring	319	2019-11-14	15:10:00	DB-PICA	NA	PICA	3.194	0.005	39.767	0.01	0.465657	6.616	4.635	11.051	11.37	3566.27	-0.359	0.01	2.058	3493.26	0	7	306	332	1.08935	1.23034	0.690389	24.5
X2019-04-Spring	26	2019-05-10	16:10:00	CORS	NA	R	-3.666	0.006	34.962	0.009	-4.15772	0.022	-0.018	-0.387	-1.252	4.444	-0.393	0.009	-1.217	4.455	0	1	1	27	0.986339	1.04301	0.736923	9.6
X2019-04-Spring	30	2019-05-15	18:25:00	CORS	NA	R	-3.699	0.006	34.998	0.012	-4.12308	-0.008	0.017	-0.483	-1.166	6.531	-0.493	0.009	-1.201	6.504	0	2	28	128	1.01639	1.12042	0.702937	20.2
X2019-04-Spring	70	2019-05-28	17:54:00	CORS	NA	R	-3.691	0.005	35.028	0.013	-4.09422	0.001	0.046	-0.429	-1.309	8.911	-0.475	0.011	-1.4	8.819	0	2	28	128	1.01639	1.12042	0.719935	14.8
X2019-04-Spring	94	2019-06-05	11:43:00	CORS	NA	R	-3.688	0.007	35.047	0.011	-4.07594	0.004	0.064	-0.388	0.15	4.644	-0.455	0.01	0.022	4.513	0	2	28	128	1.01639	1.12042	0.739278	8.9
X2019-04-Spring	130	2019-06-17	18:30:00	CORS	NA	R	-3.699	0.005	35.586	0.043	-3.55731	0.012	0.585	0.083	9.258	-24.81	-0.504	0.011	8.078	-25.943	48	3	129	167	1.02473	1.16446	0.717789	15.5
X2019-04-Spring	159	2019-06-26	12:38:00	CORS	NA	R	-3.767	0.007	34.884	0.011	-4.23277	-0.076	-0.093	-0.687	-1.087	4.955	-0.517	0.012	-0.901	5.22	0	3	129	167	1.02473	1.16446	0.724953	13.2
X2019-04-Spring	182	2019-08-02	11:53:00	CORS	NA	R	-3.761	0.006	34.892	0.012	-4.22508	-0.069	-0.085	-0.313	-0.144	-2.816	-0.158	0.011	0.026	-2.576	0	4	168	197	1.02335	0.935498	0.853601	-19.6
X2019-04-Spring	202	2019-08-13	09:00:00	CORS	NA	R	-3.736	0.008	35.022	0.015	-4.09999	-0.042	0.041	-0.378	-0.188	2.384	-0.375	0.011	-0.27	2.349	0	5	198	236	1.03859	1.07565	0.768382	0.8
X2019-04-Spring	225	2019-08-21	12:16:00	CORS	NA	R	-3.604	0.006	35.149	0.011	-3.97779	0.087	0.164	-0.144	-0.061	4.238	-0.394	0.011	-0.388	3.822	0	5	198	236	1.03859	1.07565	0.742333	8.1
X2019-04-Spring	252	2019-08-29	15:35:00	CORS	NA	R	-3.843	0.005	34.828	0.013	-4.28666	-0.149	-0.147	-0.793	-0.733	3.429	-0.495	0.01	-0.439	3.878	0	6	237	304	0.999134	1.06277	0.658894	35.9
X2019-04-Spring	268	2019-09-05	14:14:00	CORS	NA	R	-3.65	0.006	35.149	0.011	-3.97779	0.043	0.163	-0.24	-0.1	5.848	-0.444	0.011	-0.426	5.479	0	6	237	304	0.999134	1.06277	0.696813	22.3
X2019-04-Spring	296	2019-09-14	13:37:00	CORS	NA	R	-3.732	0.006	35.058	0.01	-4.06535	-0.037	0.075	-0.416	-0.179	3.325	-0.451	0.009	-0.329	3.217	0	6	237	304	0.999134	1.06277	0.693968	23.2
X2019-04-Spring	339	2019-12-09	11:25:00	CORS	NA	R	-3.471	0.009	35.539	0.03	-3.60253	0.224	0.54	0.395	2.412	58.567	-0.368	0.012	1.33	57.191	48	8	333	371	1.00313	1.13758	0.834639	-15.4
X2019-04-Spring	361	2019-12-17	16:20:00	CORS	NA	R	-3.653	0.005	35.199	0.024	-3.92968	0.042	0.212	0.002	0.948	77.096	-0.25	0.01	0.525	76.6	0	8	333	371	1.00313	1.13758	0.958771	-39.4
X2019-04-Spring	39	2019-05-17	17:40:00	ETH-1	NA	ETH1	1.871	0.006	36.76	0.011	-2.42768	5.275	1.73	6.468	4.855	4.098	-0.68	0.01	1.387	-4.902	0	2	28	128	1.01639	1.12042	0.345886	387
X2019-04-Spring	119	2019-06-13	10:00:00	ETH1	NA	ETH1	1.921	0.005	36.869	0.023	-2.3228	5.325	1.835	6.565	10.343	3.902	-0.738	0.009	6.645	-5.354	1	2	28	128	1.01639	1.12042	0.284605	926.7
X2019-04-Spring	283	2019-09-11	11:51:00	ETH1	NA	ETH1	1.931	0.006	36.843	0.01	-2.34782	5.333	1.81	6.7	16.749	1.767	-0.588	0.01	13.079	-7.429	1	6	237	304	0.999134	1.06277	0.38933	266.9
X2019-04-Spring	45	2019-05-21	11:34:00	ETH-2	NA	ETH2	-10.219	0.005	19.54	0.009	-18.9968	-6.642	-14.917	-22.81	-38.03	10.775	-1.422	0.01	-8.676	48.492	0	2	28	128	1.01639	1.12042	0.295072	743.3
X2019-04-Spring	193	2019-08-08	16:40:00	ETH2	NA	ETH2	-10.106	0.006	19.921	0.011	-18.6302	-6.523	-14.549	-22.218	-36.408	1.883	-1.307	0.009	-7.745	38.373	0	4	168	197	1.02335	0.935498	0.223114	NA
X2019-04-Spring	8	2019-04-11	18:03:00	D12471-Pycnew-1	P. newberryi	MMJ	5.181	0.005	35.906	0.011	-3.2494	8.349	0.912	9.342	3.345	-2.833	-0.175	0.011	1.518	-13.398	0	1	1	27	0.986339	1.04301	0.712027	17.3
X2019-04-Spring	9	2019-04-12	09:42:00	D9020-Pycnew-1	P. newberryi	MMJ	4.116	0.006	34.731	0.01	-4.37999	7.312	-0.224	7.081	2.055	-2.88	-0.239	0.011	2.505	-10.154	0	1	1	27	0.986339	1.04301	0.704658	19.7
X2019-04-Spring	10	2019-04-12	12:07:00	D5779-Pycnew-1	P. newberryi	MMJ	5.965	0.005	35.037	0.011	-4.08556	9.056	0.075	9.155	58.965	-2.128	-0.26	0.011	58.806	-11.814	48	1	1	27	0.986339	1.04301	0.6328	46.5
X2019-04-Spring	31	2019-05-16	09:50:00	D9020-Pycnew-2	P. newberryi	MMJ	4.181	0.005	34.98	0.013	-4.1404	7.381	0.017	7.28	-0.569	4.113	-0.35	0.01	-0.603	-3.759	0	2	28	128	1.01639	1.12042	0.661789	34.8
X2019-04-Spring	54	2019-05-23	12:11:00	D5759-ExoB-2	Exogyra	MMJ	-0.741	0.005	32.139	0.012	-6.87402	2.67	-2.736	-0.445	-7.612	3.811	-0.502	0.009	-2.158	6.367	0	2	28	128	1.01639	1.12042	0.692877	23.6
X2019-04-Spring	55	2019-05-23	14:11:00	D7361-PycnC-2	P. newberryi	MMJ	3.595	0.005	34.331	0.009	-4.76487	6.81	-0.611	6.012	-1.701	3.876	-0.406	0.01	-0.48	-2.161	0	2	28	128	1.01639	1.12042	0.635333	45.4
X2019-04-Spring	107	2019-06-10	13:20:00	D7361-PycnC-3	P. newberryi	MMJ	3.636	0.006	34.341	0.01	-4.75525	6.848	-0.602	5.984	2.409	-0.293	-0.482	0.012	3.616	-6.363	48	2	28	128	1.01639	1.12042	0.558759	83.7
X2019-04-Spring	108	2019-06-10	15:28:00	D5759-ExoB-3	Exogyra	MMJ	-0.863	0.006	32.097	0.009	-6.91443	2.554	-2.777	-0.681	-5.725	2.036	-0.578	0.01	-0.179	4.792	0	2	28	128	1.01639	1.12042	0.6213	51.5
X2019-04-Spring	110	2019-06-11	10:27:00	D6175-PycnewB-2	P. newberryi	MMJ	2.564	0.007	33.705	0.012	-5.36721	5.821	-1.218	4.384	-3.211	3.007	-0.416	0.012	-0.779	-0.788	0	2	28	128	1.01639	1.12042	0.664279	33.9
X2019-04-Spring	112	2019-06-11	14:43:00	D12471-Pycnew-2	P. newberryi	MMJ	5.161	0.007	35.755	0.012	-3.3947	8.325	0.766	9.053	0.864	4.578	-0.294	0.01	-0.668	-5.756	0	2	28	128	1.01639	1.12042	0.676114	29.5
X2019-04-Spring	113	2019-06-11	16:40:00	D6899-OstC-2	Ostrea	MMJ	0.319	0.006	30.798	0.012	-8.16433	3.619	-4.028	-0.789	-5.591	4.88	-0.547	0.01	2.469	8.991	48	2	28	128	1.01639	1.12042	0.655403	37.3
X2019-04-Spring	116	2019-06-12	13:46:00	D9020-Pycnew-3	P. newberryi	MMJ	4.137	0.005	34.957	0.011	-4.16253	7.339	-0.006	7.227	-1.197	5.16	-0.337	0.012	-1.186	-2.63	0	2	28	128	1.01639	1.12042	0.676276	29.4
X2019-04-Spring	120	2019-06-13	12:10:00	D7361-PycnC-4	P. newberryi	MMJ	3.63	0.006	34.325	0.015	-4.77065	6.842	-0.617	6.026	6.13	3.476	-0.42	0.011	7.372	-2.581	48	2	28	128	1.01639	1.12042	0.620767	51.8
X2019-04-Spring	121	2019-06-13	14:46:00	D5759-ExoB-4	Exogyra	MMJ	-0.963	0.006	31.858	0.012	-7.1444	2.453	-3.008	-0.963	-8.146	2.751	-0.529	0.008	-2.153	6.074	0	2	28	128	1.01639	1.12042	0.677878	28.9
X2019-04-Spring	131	2019-06-18	09:35:00	D9020-Pycnew-4	P. newberryi	MMJ	4.115	0.005	35.316	0.013	-3.8171	7.33	0.341	7.55	0.369	2.543	-0.348	0.012	-0.313	-5.896	0	3	129	167	1.02473	1.16446	0.678992	28.5
X2019-04-Spring	133	2019-06-18	13:30:00	D12471-Pycnew-3	P. newberryi	MMJ	5.117	0.005	35.826	0.009	-3.32638	8.287	0.835	9.088	1.374	4.382	-0.287	0.01	-0.295	-6.043	0	3	129	167	1.02473	1.16446	0.700582	21
X2019-04-Spring	135	2019-06-18	17:44:00	D13917-PyckelA-2	P. kellumi	MMJ	1.904	0.005	34.101	0.011	-4.98618	5.217	-0.837	4.174	-2.983	1.202	-0.38	0.01	-1.312	-2.695	0	3	129	167	1.02473	1.16446	0.736017	9.9
X2019-04-Spring	137	2019-06-19	11:44:00	D6899-OstC-3	Ostrea	MMJ	0.254	0.006	30.757	0.011	-8.20378	3.557	-4.068	-0.896	-8.785	4.501	-0.551	0.011	-0.671	8.755	0	3	129	167	1.02473	1.16446	0.695673	22.7
X2019-04-Spring	138	2019-06-19	13:45:00	D5779-Pycnew-2	P. newberryi	MMJ	5.72	0.006	34.69	0.011	-4.41944	8.815	-0.26	8.447	40.964	1.796	-0.386	0.011	41.506	-7.021	48	3	129	167	1.02473	1.16446	0.616188	53.8
X2019-04-Spring	144	2019-06-21	10:33:00	D7361-PycnC-5	P. newberryi	MMJ	3.652	0.005	34.375	0.013	-4.72254	6.864	-0.569	6.068	6.693	5.633	-0.448	0.013	7.84	-0.555	48	3	129	167	1.02473	1.16446	0.615947	54
X2019-04-Spring	146	2019-06-21	14:39:00	D5759-ExoB-5	Exogyra	MMJ	-1.141	0.015	35.393	0.272	-3.74301	2.404	0.404	2.076	57.071	-156.789	-0.801	0.021	56.217	-159.612	48	3	129	167	1.02473	1.16446	0.360422	338.4
X2019-04-Spring	160	2019-06-26	14:44:00	D12471-Pycnew-4	P. newberryi	MMJ	4.621	0.007	35.213	0.015	-3.91621	7.801	0.243	7.937	-0.422	5.156	-0.35	0.011	-0.907	-3.609	0	3	129	167	1.02473	1.16446	0.666646	33
X2019-04-Spring	161	2019-06-26	16:50:00	D13917-PyckelA-3	P. kellumi	MMJ	1.965	0.006	34.35	0.011	-4.74659	5.281	-0.596	4.416	-2.618	5.388	-0.441	0.01	-1.428	0.932	0	3	129	167	1.02473	1.16446	0.66707	32.8
X2019-04-Spring	162	2019-06-27	11:41:00	D6175-PycnewB-3	P. newberryi	MMJ	2.779	0.006	33.832	0.01	-5.24501	6.028	-1.094	4.647	-2.943	4.204	-0.488	0.009	-0.758	-0.058	0	3	129	167	1.02473	1.16446	0.612762	55.4
X2019-04-Spring	183	2019-08-02	14:10:00	D13917-PyckelA-4	P. kellumi	MMJ	1.857	0.005	34.075	0.01	-5.0112	5.171	-0.862	4.354	-2.194	-1.358	-0.128	0.011	-0.472	-5.147	0	4	168	197	1.02335	0.935498	0.768112	0.9
X2019-04-Spring	187	2019-08-07	13:45:00	D5737-ExoB-2	Exogyra	MMJ	0.592	0.007	33.628	0.011	-5.4413	3.97	-1.296	2.547	-3.091	-3.732	-0.269	0.011	-0.502	-5.399	0	4	168	197	1.02335	0.935498	0.668806	32.2
X2019-04-Spring	189	2019-08-07	17:54:00	D5779-Pycnew-3	P. newberryi	MMJ	5.6	0.006	34.619	0.011	-4.48776	8.7	-0.329	8.508	-0.465	-3.469	-0.141	0.008	0.192	-11.987	0	4	168	197	1.02335	0.935498	0.65139	38.9
X2019-04-Spring	192	2019-08-08	14:06:00	D12471-Pycnew-5	P. newberryi	MMJ	5.178	0.008	35.879	0.015	-3.27538	8.346	0.887	9.325	2.457	-2.342	-0.165	0.01	0.681	-12.861	0	4	168	197	1.02335	0.935498	0.60649	58.4
X2019-04-Spring	253	2019-08-29	17:45:00	D10440-pyncA	P. newberryi	MMJ	1.647	0.008	34.778	0.015	-4.33477	4.998	-0.184	4.57	-0.683	2.779	-0.403	0.008	-0.315	-2.175	0	6	237	304	0.999134	1.06277	0.624383	50.2
X2019-04-Spring	255	2019-08-30	12:28:00	D9018-Pycnew	P. newberryi	MMJ	4.181	0.006	34.881	0.013	-4.23566	7.378	-0.079	7.294	-0.378	1.816	-0.238	0.009	-0.22	-5.847	0	6	237	304	0.999134	1.06277	0.725023	13.2
X2019-04-Spring	256	2019-08-30	14:44:00	D4353-pyncB	P. newberryi	MMJ	4.03	0.009	34.983	0.017	-4.13752	7.239	0.019	7.198	0.03	1.033	-0.288	0.011	-0.008	-6.669	0	6	237	304	0.999134	1.06277	0.67733	29.1
X2019-04-Spring	258	2019-08-30	19:52:00	D5792-pycnB	P. newberryi	MMJ	3.476	0.007	34.386	0.015	-4.71195	6.7	-0.559	5.689	-1.744	4.342	-0.666	0.008	-0.627	-1.683	0	6	237	304	0.999134	1.06277	0.335231	431.1
X2019-04-Spring	264	2019-09-04	16:05:00	D9018-Pycnew	P. newberryi	MMJ	4.275	0.007	35.095	0.012	-4.02975	7.473	0.127	7.54	0.028	2.429	-0.295	0.011	-0.227	-5.742	0	6	237	304	0.999134	1.06277	0.662273	34.6
X2019-04-Spring	265	2019-09-04	18:10:00	D10440-pyncA	P. newberryi	MMJ	1.798	0.012	34.756	0.022	-4.35594	5.138	-0.205	4.686	-0.65	4.33	-0.411	0.009	-0.241	-0.739	0	6	237	304	0.999134	1.06277	0.613656	55
X2019-04-Spring	282	2019-09-10	16:36:00	D4353-pyncB	P. newberryi	MMJ	4.174	0.008	35.33	0.016	-3.80363	7.386	0.354	7.628	0.981	2.709	-0.342	0.01	0.273	-5.816	0	6	237	304	0.999134	1.06277	0.613239	55.2
X2019-04-Spring	293	2019-09-13	16:50:00	D11792A-Pycnsp	P. kellumi	MMJ	1.957	0.006	33.33	0.01	-5.72804	5.24	-1.581	3.385	-3.928	3.634	-0.457	0.009	-0.77	1.168	0	6	237	304	0.999134	1.06277	0.598366	62.3
X2019-04-Spring	295	2019-09-14	11:29:00	D8304B-Pycnsp	P. kellumi	MMJ	2.227	0.008	35.657	0.016	-3.48899	5.571	0.666	6.161	1.599	1.618	-0.244	0.012	0.266	-5.597	0	6	237	304	0.999134	1.06277	0.745738	7.1
X2019-04-Spring	328	2019-11-18	16:59:00	D4353-PycnB	P. newberryi	MMJ	3.915	0.006	34.953	0.011	-4.16638	7.131	-0.01	6.782	-0.588	3.007	-0.561	0.019	-0.568	-4.539	0	7	306	332	1.08935	1.23034	0.555663	85.6
X2019-04-Spring	346	2019-12-11	09:30:00	D9018-Pycnew	P. newberryi	MMJ	4.525	0.008	35.716	0.028	-3.43222	7.728	0.728	8.331	3.581	37.228	-0.36	0.011	2.121	27.283	0	8	333	371	1.00313	1.13758	0.726284	12.8
X2019-04-Spring	348	2019-12-11	13:25:00	D8304B-Pycnsp	P. kellumi	MMJ	2.542	0.006	36.418	0.021	-2.75676	5.892	1.401	6.961	4.903	17.636	-0.5	0.011	2.093	8.507	0	8	333	371	1.00313	1.13758	0.605936	58.6

## Sheet: Nu D47 Replicate Level Data
TABLE S1f. REPLICATE LEVEL NU PERSPECTIVE DATA
Sample_ID	Name	Date	DateTime	BatchName	SCIPPnum	CarbORGas	Type	Type2	Mode	Weight (ug)	Trans_Pressure	Yield	NuYield	MaxPumpOverPressure	Chops	BalancePercent	Issue	autorefill	Sequence	NumBlocks	NumCycles	IntTime	sam44current	ref44current	d13C_PDB	d13C_err	d13C_rm	d18O_gasPDB	d18O_err	d18O_gasSMOW	d18O_rm	d45	d45_err	d45_rm	d46	d46_err	d47	d47_err	d47_rm	d48	d48_err	d48_rm	d49	d49_err	d49_rm	D47	D47_err	D47_rm	D48
2864_D4353-PycnewB-Nu-1	D4353-PycnewB-Nu-1	2.02102e+07	2021-02-23 16:04:00	2021_02_21_bellows	2864	Carb	sample	Unknown	Bel	3500	167.82	20.8557	3.61e-12	0.0042936	0	-0.65	0	FALSE	C:\Nu Stable\Analyses\CLUMPED-SEQUENCES\Clumped NuCarb.seq	4	20	20	7.97e-08	7.97e-08	4.36256	0.000526537	0	4.54824	0.00113724	35.5988	0	14.1042	0.00051141	0	4.51656	0.00113644	18.7754	0.00602282	0	9.03033	0.0198681	0	13.6344	0.900716	0	-0.281119	0.00579437	0	-0.0228581
2871_D8304-PycnspB-Nu-1	D8304-PycnspB-Nu-1	2.02102e+07	2021-02-24 05:32:00	2021_02_21_bellows	2871	Carb	sample	Unknown	Bel	3700	164.64	22.4733	3.34e-12	0.0057514	0	-0.82	0	FALSE	C:\Nu Stable\Analyses\CLUMPED-SEQUENCES\Clumped NuCarb + auto refill - short.seq	4	20	20	7.91e-08	7.92e-08	2.47892	0.000536033	0	5.00585	0.00108687	36.0706	0	12.343	0.000515944	0	4.96974	0.00108602	17.4297	0.00706204	1	10.0356	0.0195378	0	12.2678	0.979583	1	-0.252939	0.00707378	1	0.0707958
2884_5737-ExoB-1	D5737-ExoB-1	2.02102e+07	2021-02-25 04:39:00	2021_02_21_bellows	2884	Carb	sample	Unknown	Bel	3700	164.7	22.4651	3.36e-12	0.0030643	0	-0.82	0	FALSE	C:\Nu Stable\Analyses\CLUMPED-SEQUENCES\Clumped NuCarb.seq	4	20	20	7.95e-08	7.96e-08	0.462093	0.000549343	0	3.51707	0.000804796	34.5358	0	10.3881	0.000523664	0	3.47824	0.000804157	13.8498	0.00582998	0	6.97144	0.0253924	0	6.25541	0.922848	0	-0.323231	0.00592291	0	0.00293466
2887_D6175-PycnewA-Nu-1	D6175-PycnewA-Nu-1	2.02102e+07	2021-02-25 12:06:00	2021_02_21_bellows	2887	Carb	sample	Unknown	Bel	3800	168.58	22.5412	3.37e-12	0.001	0	-0.92	0	FALSE	C:\Nu Stable\Analyses\CLUMPED-SEQUENCES\Clumped NuCarb.seq	4	20	20	7.97e-08	7.97e-08	4.45826	0.00050849	0	4.33585	0.000870937	35.3799	0	14.1871	0.000489491	0	4.30459	0.000870355	18.64	0.00702609	1	8.65823	0.0219989	1	14.4638	1.16505	1	-0.290722	0.00695162	1	0.0306922
2888_D6816-PycnewB-Nu-1	D6816-PycnewB-Nu-1	2.02102e+07	2021-02-25 13:52:00	2021_02_21_bellows	2888	Carb	sample	Unknown	Bel	3500	149.69	23.3817	2.98e-12	0.0084293	0	-0.9	PumpOver	FALSE	C:\Nu Stable\Analyses\CLUMPED-SEQUENCES\Clumped NuCarb.seq	4	20	20	6.45e-08	6.56e-08	5.42656	0.000646296	0	-1.67937	0.00132808	29.1787	0	14.89	0.000630879	0	-1.70259	0.0013273	13.2802	0.00686068	0	-3.37419	0.0251955	0	9.06981	1.27273	1	-0.38269	0.00657092	0	0.02832
2889_D13917-PyckelB-Nu-1	D13917-PyckelB-Nu-1	2.02102e+07	2021-02-25 15:38:00	2021_02_21_bellows	2889	Carb	sample	Unknown	Bel	3900	181.03	21.5434	3.56e-12	0.0023928	0	-0.79	0	FALSE	C:\Nu Stable\Analyses\CLUMPED-SEQUENCES\Clumped NuCarb.seq	4	20	20	7.95e-08	7.95e-08	2.66141	0.000502162	0	3.57683	0.0014462	34.5974	0	12.4652	0.000480911	0	3.54257	0.00144481	16.1066	0.00597822	2	7.13997	0.0224329	0	15.3342	1.1526	1	-0.282096	0.00598874	2	0.042085
2896_D9020-Pycnew1-Nu-1	D9020-Pycnew1-Nu-1	2.02102e+07	2021-02-26 06:09:00	2021_02_21_bellows	2896	Carb	sample	Unknown	Bel	3500	164.67	21.2546	3.55e-12	0.0015964	0	-0.59	0	FALSE	C:\Nu Stable\Analyses\CLUMPED-SEQUENCES\Clumped NuCarb + auto refill - short.seq	4	20	20	7.93e-08	7.93e-08	4.29436	0.000509495	0	4.48785	0.00087999	35.5366	0	14.0377	0.000488313	0	4.45609	0.000879319	18.6619	0.00692661	0	8.97564	0.0237367	0	10.85	1.02366	1	-0.265742	0.00675349	0	0.0433466
2901_D11792A-Pyc-kel-1	D11792A-Pyc-kel-1	2.02102e+07	2021-02-26 15:03:00	2021_02_21_bellows	2901	Carb	sample	Unknown	Bel	3700	168.79	21.9207	3.44e-12	0.002187	0	-0.97	0	FALSE	C:\Nu Stable\Analyses\CLUMPED-SEQUENCES\Clumped NuCarb + auto refill - short.seq	4	20	20	7.97e-08	7.97e-08	2.04723	0.000449948	0	2.54623	0.00115877	33.5349	0	11.8497	0.000437601	0	2.51174	0.00115784	14.4478	0.00589906	1	5.08433	0.0231317	0	11.2981	0.950489	1	-0.277664	0.005865	1	0.0543773
2904_D4353-PycnewA-Nu-1	D4353-PycnewA-Nu-1	2.02102e+07	2021-02-26 20:25:00	2021_02_21_bellows	2904	Carb	sample	Unknown	Bel	3600	156.89	22.946	3.24e-12	0.0023928	0	-0.97	0	FALSE	C:\Nu Stable\Analyses\CLUMPED-SEQUENCES\Clumped NuCarb.seq	4	20	20	7.42e-08	7.45e-08	5.45092	0.00053499	0	4.41848	0.000927079	35.4651	0	15.1265	0.000507303	0	4.38923	0.000926181	19.7398	0.00704183	2	8.91783	0.0230424	1	24.1514	1.51349	1	-0.249943	0.00703766	2	0.119149
2906_D9018-PycnewB-Nu-1	D9018-PycnewB-Nu-1	2.02102e+07	2021-02-27 01:23:00	2021_02_21_bellows	2906	Carb	sample	Unknown	Bel	3700	162.84	22.7217	3.3e-12	0.001	0	-0.75	0	FALSE	C:\Nu Stable\Analyses\CLUMPED-SEQUENCES\Clumped NuCarb.seq	4	20	20	7.83e-08	7.85e-08	5.52646	0.000455558	0	4.81647	0.000774273	35.8754	0	15.2117	0.000434474	0	4.78697	0.000773615	20.1899	0.00666429	0	9.60739	0.025051	0	10.4819	0.855238	1	-0.284331	0.00646248	0	0.0105707
2914_D2402-PycnewA-1	D2402-PycnewA-1	2.02102e+07	2021-02-28 23:34:00	2021_02_28_bellows	2914	Carb	sample	Unknown	Bel	3900	193.45	20.1602	3.85e-12	0.001	0	-0.91	0	FALSE	C:\Nu Stable\Analyses\CLUMPED-SEQUENCES\Clumped NuCarb.seq	4	20	20	7.96e-08	7.96e-08	4.8784	0.000509406	0	4.07864	0.00080704	35.1147	0	14.5745	0.000487895	0	4.04853	0.00080646	18.761	0.00673645	0	8.05494	0.0219765	0	5.54549	1.04419	0	-0.315403	0.00663013	0	-0.0579053
2915_D6175-PycnewB-Nu-1	D6175-PycnewB-Nu-1	2.02103e+07	2021-03-01 01:20:00	2021_02_28_bellows	2915	Carb	sample	Unknown	Bel	3500	170.23	20.5604	3.65e-12	0.001	0	-0.91	0	FALSE	C:\Nu Stable\Analyses\CLUMPED-SEQUENCES\Clumped NuCarb.seq	4	20	20	7.97e-08	7.97e-08	3.47365	0.000473899	0	4.23584	0.000777875	35.2768	0	13.2546	0.000454246	0	4.20261	0.000777309	17.53	0.00634498	0	8.40431	0.0224438	0	7.41814	0.926527	0	-0.332338	0.00631002	0	-0.0182976
2923_D8304-Pycnsp-Nu-1	D8304-PycnspA-Nu-1	2.02103e+07	2021-03-01 15:33:00	2021_02_28_bellows	2923	Carb	sample	Unknown	Bel	3600	167.85	21.4477	3.52e-12	0.0075329	0	-0.72	PumpOver	FALSE	C:\Nu Stable\Analyses\CLUMPED-SEQUENCES\Clumped NuCarb + auto refill - short.seq	4	20	20	7.97e-08	7.97e-08	1.5332	0.000581532	0	5.22303	0.00131995	36.2945	0	11.4583	0.000566943	0	5.1847	0.00131904	16.7213	0.00657171	0	10.4103	0.0236617	0	14.2251	1.03812	0	-0.257734	0.00628252	0	0.0140055
2927_D12471-PycnewA-Nu-1	D12471-PycnewA-Nu-1	2.02103e+07	2021-03-01 22:39:00	2021_02_28_bellows	2927	Carb	sample	Unknown	Bel	3600	168.06	21.4209	3.53e-12	0.001	0	-0.69	0	FALSE	C:\Nu Stable\Analyses\CLUMPED-SEQUENCES\Clumped NuCarb.seq	4	20	20	7.97e-08	7.97e-08	3.24709	0.000529004	0	2.95463	0.00106043	33.956	0	12.996	0.000508258	0	2.92224	0.00105957	16.0165	0.00597157	0	5.86556	0.0235043	0	8.73025	0.96342	0	-0.3032	0.00588473	0	0.0125789
2931_5737-ExoB-2	D5737-ExoB-2	2.02103e+07	2021-03-02 05:46:00	2021_02_28_bellows	2931	Carb	sample	Unknown	Bel	3700	181.12	20.4284	3.76e-12	0.0022367	0	-1.15	0	FALSE	C:\Nu Stable\Analyses\CLUMPED-SEQUENCES\Clumped NuCarb.seq	4	20	20	7.95e-08	7.95e-08	0.536051	0.00050256	0	3.76649	0.000928988	34.7929	0	10.4666	0.000466314	0	3.72756	0.000927741	14.1709	0.00630629	0	7.45797	0.0232783	0	6.6964	0.993049	0	-0.331004	0.0061633	0	-0.0108657
2937_D9018-PycnewB-Nu-2	D9018-PycnewB-Nu-2	2.02103e+07	2021-03-02 16:00:00	2021_02_28_bellows	2937	Carb	sample	Unknown	Bel	3500	163.45	21.4133	3.52e-12	0.001	0	-0.78	0	FALSE	C:\Nu Stable\Analyses\CLUMPED-SEQUENCES\Clumped NuCarb.seq	4	20	20	7.87e-08	7.89e-08	5.73714	0.00057681	0	5.42306	0.000891332	36.5007	1	15.4317	0.000556277	0	5.39337	0.000890195	21.0249	0.00747727	0	10.7961	0.0217096	0	11.5366	0.887937	0	-0.284232	0.00703057	0	-0.0219543
2970_D8304-PycnspB-Nu-2	D8304-PycnspB-Nu-2	2.02103e+07	2021-03-11 11:40:00	2021_03_09_bellows	2970	Carb	sample	Unknown	Bel	3800	194.03	19.5846	3.81e-12	0.001	0	-0.39	0	TRUE	C:\Nu Stable\Analyses\CLUMPED-SEQUENCES\Clumped NuCarb.seq	4	20	20	7.96e-08	7.95e-08	2.75841	0.00040111	0	5.7203	0.00104336	36.8071	0	12.6317	0.000376543	0	5.68404	0.0010422	18.3721	0.00696638	0	11.2974	0.0217622	0	-2.19528	0.791567	0	-0.319832	0.00684746	0	-0.101715
2978_D9020-PycnewA-Nu-2	D9020-PycnewA-Nu-2	2.02103e+07	2021-03-12 04:34:00	2021_03_09_bellows	2978	Carb	sample	Unknown	Bel	3800	184.57	20.5884	3.63e-12	0.001	0	-0.03	0	TRUE	C:\Nu Stable\Analyses\CLUMPED-SEQUENCES\Clumped NuCarb + auto refill - short - 25nA.seq	4	20	20	7.96e-08	7.95e-08	4.43726	0.000492262	0	5.14992	0.00122	36.2191	0	14.1957	0.000473192	0	5.11778	0.00121892	19.4218	0.00730843	0	10.1759	0.020998	0	-2.26034	0.921292	0	-0.328228	0.00690819	0	-0.0848785
2984_D6175-PycnewB-Nu-2	D6175-PycnewB-Nu-2	2.02103e+07	2021-03-12 15:53:00	2021_03_09_bellows	2984	Carb	sample	Unknown	Bel	3500	177.8	19.685	3.77e-12	0.001	0	0.06	0	TRUE	C:\Nu Stable\Analyses\CLUMPED-SEQUENCES\Clumped NuCarb + auto refill - short - 25nA.seq	4	20	20	7.97e-08	7.97e-08	1.76612	0.000457591	0	3.89481	0.00153757	34.9252	0	11.6317	0.000435011	0	3.85834	0.00153599	15.4613	0.00617612	0	7.70494	0.0256013	0	-6.4786	0.841714	1	-0.376432	0.00606583	0	-0.0263225
2987_D6816-PycnewB-Nu-2	D6816-PycnewB-Nu-2	2.02103e+07	2021-03-12 21:10:00	2021_03_09_bellows	2987	Carb	sample	Unknown	Bel	3900	194.64	20.037	3.75e-12	0.001	0	0.13	0	TRUE	C:\Nu Stable\Analyses\CLUMPED-SEQUENCES\Clumped NuCarb + auto refill - short - 25nA.seq	4	20	20	7.96e-08	7.96e-08	5.46869	0.000419785	0	-1.19722	0.00157788	29.6758	0	14.9467	0.0003953	0	-1.22084	0.00157618	13.7305	0.00618084	0	-2.3161	0.0247544	0	-14.6637	0.912102	0	-0.470252	0.00615625	0	0.124538
2993_D12471-PycnewA-Nu-2	D12471-PycnewA-Nu-2	2.02103e+07	2021-03-13 09:48:00	2021_03_09_bellows	2993	Carb	sample	Unknown	Bel	3700	184.45	20.0596	3.71e-12	0.001	0	-0.18	0	TRUE	C:\Nu Stable\Analyses\CLUMPED-SEQUENCES\Clumped NuCarb + auto refill - short - 25nA.seq	4	20	20	7.95e-08	7.95e-08	3.45292	0.000554499	0	3.56567	0.00114951	34.5859	0	13.2116	0.000530615	0	3.53309	0.0011485	16.7983	0.00752176	1	7.06625	0.0228342	0	-4.68186	0.771166	0	-0.3522	0.00744663	1	-0.0122034
2996_D13917-PyckelB-NU-2	D13917-PyckelB-NU-2	2.02103e+07	2021-03-13 15:07:00	2021_03_09_bellows	2996	Carb	sample	Unknown	Bel	3800	185.21	20.5173	3.63e-12	0.001	0	-0.2	0	TRUE	C:\Nu Stable\Analyses\CLUMPED-SEQUENCES\Clumped NuCarb + auto refill - short - 25nA.seq	4	20	20	7.95e-08	7.95e-08	2.64687	0.000435791	0	4.26856	0.00106607	35.3105	0	12.4757	0.000421838	0	4.23356	0.0010652	16.7549	0.0069577	0	8.38403	0.0220005	0	-5.29241	0.857027	0	-0.331218	0.00687939	0	-0.10004
3000_D11792A-Pyc-kel-2	D11792A-Pyc-kel-2	2.02103e+07	2021-03-13 22:51:00	2021_03_09_bellows	3000	Carb	sample	Unknown	Bel	3900	200.74	19.4281	3.91e-12	0.001	0	-0.08	0	TRUE	C:\Nu Stable\Analyses\CLUMPED-SEQUENCES\Clumped NuCarb.seq	4	20	20	7.97e-08	7.96e-08	2.00329	0.0004381	0	3.19691	0.000861812	34.2057	0	11.831	0.000421228	0	3.16166	0.000861135	15.007	0.00655452	0	6.21505	0.020177	0	-5.01966	1.14717	0	-0.344744	0.00659814	0	-0.117419
3002_D8304-PycnspA-Nu-2	D8304-PycnspA-Nu-2	2.02103e+07	2021-03-14 05:06:00	2021_03_09_bellows	3002	Carb	sample	Unknown	Bel	3600	165.77	21.7168	3.39e-12	0.001	0	-0.29	0	TRUE	C:\Nu Stable\Analyses\CLUMPED-SEQUENCES\Clumped NuCarb + auto refill - short - 25nA.seq	4	20	20	7.75e-08	7.77e-08	1.72595	0.000528594	0	5.87617	0.00159795	36.9678	0	11.663	0.000508407	0	5.83757	0.00159644	17.5118	0.0065192	1	11.5868	0.0227837	0	-3.27948	0.866805	0	-0.324856	0.00689047	0	-0.12093
3011_D4353-PycnewB-Nu-2	D4353-PycnewB-Nu-2	20210315	2021-03-15 00:39:00	2021_03_14_bellows	3011	Carb	sample	Unknown	Bel	3900	196.87	19.81	3.82e-12	0.001	0	-0.2	0	FALSE	C:\Nu Stable\Analyses\CLUMPED-SEQUENCES\Clumped NuCarb.seq	4	20	20	7.96e-08	7.96e-08	4.52793	0.000586876	0	4.98844	0.000920493	36.0526	0	14.2756	0.000563085	0	4.95666	0.000919875	19.3438	0.006187	0	9.8989	0.0230483	0	0.907452	0.90451	0	-0.328341	0.00623451	0	-0.0384658
3014_D2402-PycnewA-2	D2402-PycnewA-2	2.02103e+07	2021-03-15 06:40:00	2021_03_14_bellows	3014	Carb	sample	Unknown	Bel	3900	198.73	19.6246	3.85e-12	0.001	0	-0.17	0	FALSE	C:\Nu Stable\Analyses\CLUMPED-SEQUENCES\Clumped NuCarb.seq	4	20	20	7.96e-08	7.96e-08	4.93076	0.000473487	0	4.24767	0.000812219	35.289	0	14.6298	0.000454376	0	4.2175	0.000811625	18.9461	0.00593434	0	8.43139	0.0226002	0	-1.73577	0.863359	0	-0.355327	0.00575124	0	-0.0210863
3020_D4353-PycnewA-Nu-2	D4353-PycnewA-Nu-2	2.02103e+07	2021-03-15 18:16:00	2021_03_14_bellows	3020	Carb	sample	Unknown	Bel	3600	191.04	18.8442	3.99e-12	0.001	0	-0.15	0	FALSE	C:\Nu Stable\Analyses\CLUMPED-SEQUENCES\Clumped NuCarb.seq	4	20	20	7.96e-08	7.95e-08	5.79448	0.000476998	0	5.19276	0.00116709	36.2633	0	15.4777	0.000462034	0	5.16343	0.00116615	20.7879	0.00631518	0	10.296	0.020992	0	-1.77178	0.960196	0	-0.336954	0.00625092	0	-0.0568456
3034_D6175-PycnewB-Nu-3	D6175-PycnewB-Nu-3	2.02103e+07	2021-03-16 21:13:00	2021_03_14_bellows	3034	Carb	sample	Unknown	Bel	3900	194.55	20.0463	3.74e-12	0.001	0	-0.27	0	FALSE	C:\Nu Stable\Analyses\CLUMPED-SEQUENCES\Clumped NuCarb.seq	4	20	20	7.96e-08	7.95e-08	1.33678	0.00053574	0	3.83121	0.000767486	34.8596	0	11.2244	0.000507982	0	3.79391	0.000766772	14.9944	0.00557256	0	7.56221	0.0230142	0	-1.88617	0.910753	0	-0.357706	0.00572586	0	-0.0395897
3038_5737-ExoB-3	D5737-ExoB-3	2.02103e+07	2021-03-17 04:21:00	2021_03_14_bellows	3038	Carb	sample	Unknown	Bel	3800	190.03	19.9968	3.74e-12	0.001	0	-0.19	0	FALSE	C:\Nu Stable\Analyses\CLUMPED-SEQUENCES\Clumped NuCarb.seq	4	20	20	7.95e-08	7.95e-08	0.682726	0.000448281	0	4.15929	0.000747291	35.1979	0	10.6187	0.000422376	0	4.12027	0.000746471	14.6778	0.00593047	0	8.13154	0.0223355	0	-6.672	0.999657	0	-0.371154	0.0057087	0	-0.124857
3040_D8304-PycnspA-Nu-3	D8304-PycnspA-Nu-3	2.02103e+07	2021-03-17 07:55:00	2021_03_14_bellows	3040	Carb	sample	Unknown	Bel	3500	184.14	19.0073	3.91e-12	0.001	0	-0.27	0	FALSE	C:\Nu Stable\Analyses\CLUMPED-SEQUENCES\Clumped NuCarb.seq	4	20	20	7.96e-08	7.95e-08	1.70863	0.000468349	0	5.74978	0.000811884	36.8375	0	11.6423	0.000449467	0	5.71128	0.000811283	17.3983	0.00591441	0	11.4162	0.0247151	0	2.64357	0.877321	1	-0.294579	0.00578723	0	-0.0384524
3042_D12471-PycnewA-Nu-3	D12471-PycnewA-Nu-3	2.02103e+07	2021-03-17 11:25:00	2021_03_14_bellows	3042	Carb	sample	Unknown	Bel	3800	192.38	19.7526	3.81e-12	0.001	0	0	0	FALSE	C:\Nu Stable\Analyses\CLUMPED-SEQUENCES\Clumped NuCarb + auto refill - short - 25nA.seq	4	20	20	7.96e-08	7.95e-08	3.54591	0.000424255	0	3.75876	0.00064313	34.7849	0	13.3061	0.000407654	0	3.72617	0.000642739	17.09	0.00583897	0	7.3972	0.0224127	0	-6.86837	0.939534	0	-0.35066	0.00578338	0	-0.0684002
3049_D6816-PycnewB-Nu-3	D6816-PycnewB-Nu-3	2.02103e+07	2021-03-17 23:49:00	2021_03_14_bellows	3049	Carb	sample	Unknown	Bel	3700	181.79	20.3532	3.63e-12	0.001	0	-0.17	0	FALSE	C:\Nu Stable\Analyses\CLUMPED-SEQUENCES\Clumped NuCarb.seq	4	20	20	7.96e-08	7.96e-08	5.479	0.000450195	0	-1.15114	0.000768805	29.7233	0	14.958	0.0004288	0	-1.1748	0.000768129	13.8043	0.0071164	1	-1.95754	0.0245786	0	-6.32552	0.830465	0	-0.454337	0.00709248	1	0.391724
3051_D9018-PycnewB-Nu-3	D9018-PycnewB-Nu-3	2.02103e+07	2021-03-18 03:18:00	2021_03_14_bellows	3051	Carb	sample	Unknown	Bel	3900	196.84	19.813	3.8e-12	0.001	0	-0.12	0	FALSE	C:\Nu Stable\Analyses\CLUMPED-SEQUENCES\Clumped NuCarb + auto refill - short - 25nA.seq	4	20	20	7.96e-08	7.95e-08	5.82483	0.000542692	0	5.54962	0.000700925	36.6312	0	15.5188	0.000518012	0	5.51999	0.000700461	21.2008	0.00679522	0	10.9612	0.0193387	0	0.157039	0.896941	0	-0.322965	0.00670366	0	-0.107928
3055_D13917-PyckelB-Nu-3	D13917-PyckelB-Nu-3	2.02103e+07	2021-03-18 10:26:00	2021_03_14_bellows	3055	Carb	sample	Unknown	Bel	3700	189.18	19.5581	3.81e-12	0.001	0	-0.18	0	FALSE	C:\Nu Stable\Analyses\CLUMPED-SEQUENCES\Clumped NuCarb.seq	4	20	20	7.95e-08	7.95e-08	2.67243	0.000448098	0	4.37372	0.00068071	35.4189	0	12.5035	0.000428403	0	4.33866	0.000680208	16.9072	0.00623758	0	8.62	0.0208757	0	2.25295	0.881071	0	-0.31267	0.00610414	0	-0.0753823
3060_D2402-PycnewA-3	D2402-PycnewA-3	2.02103e+07	2021-03-18 19:57:00	2021_03_14_bellows	3060	Carb	sample	Unknown	Bel	3700	183.56	20.1569	3.7e-12	0.001	0	-0.08	0	FALSE	C:\Nu Stable\Analyses\CLUMPED-SEQUENCES\Clumped NuCarb + auto refill - short - 25nA.seq	4	20	20	7.96e-08	7.95e-08	4.90782	0.000456296	0	4.32486	0.00103953	35.3685	0	14.6108	0.000436535	0	4.29456	0.00103859	19.0068	0.00592334	0	8.57523	0.0246869	0	-3.45496	0.958316	0	-0.351982	0.0060375	0	-0.0319307
3067_D9020-PycnewA-Nu-2	D9020-PycnewA-Nu-2	2.02103e+07	2021-03-19 08:26:00	2021_03_14_bellows	3067	Carb	sample	Unknown	Bel	3500	169.49	20.6502	3.55e-12	0.001	0	-0.25	0	FALSE	C:\Nu Stable\Analyses\CLUMPED-SEQUENCES\Clumped NuCarb.seq	4	20	20	7.91e-08	7.92e-08	4.45589	0.000479439	0	5.19886	0.000760526	36.2696	0	14.215	0.000454971	0	5.16671	0.000759816	19.5166	0.00642327	0	10.3325	0.0234471	0	5.86878	1.13162	0	-0.302687	0.00637384	0	-0.0271662
3071_D6175-PycnewA-Nu-3	D6175-PycnewA-Nu-3	2.02103e+07	2021-03-19 16:13:00	2021_03_14_bellows	3071	Carb	sample	Unknown	Bel	3600	181.34	19.8522	3.75e-12	0.001	0	-0.18	0	FALSE	C:\Nu Stable\Analyses\CLUMPED-SEQUENCES\Clumped NuCarb.seq	4	20	20	7.96e-08	7.95e-08	4.85947	0.00044345	0	5.141	0.000681522	36.2099	0	14.5937	0.00042236	0	5.10976	0.000680953	19.786	0.00664919	0	10.178	0.0265792	0	1.97346	1.04393	0	-0.367945	0.00655898	0	-0.0667844
3081_D4353-PycnewB-Nu-3	D4353-PycnewB-Nu-3	2.02103e+07	2021-03-22 01:19:00	2021_03_21_bellows	3081	Carb	sample	Unknown	Bel	3600	176.12	20.4406	3.64e-12	0.001	0	-0.23	0	FALSE	C:\Nu Stable\Analyses\CLUMPED-SEQUENCES\Clumped NuCarb.seq	4	20	20	7.97e-08	7.96e-08	4.53735	0.00048703	0	5.08454	0.000880992	36.1517	0	14.2879	0.000467626	0	5.05268	0.000880326	19.4313	0.00676423	0	10.0798	0.0240803	0	-2.8127	0.883446	0	-0.348941	0.00667997	0	-0.0504808
3086_D4353-PycnewA-Nu-3	D4353-PycnewA-Nu-3	2.02103e+07	2021-03-22 11:32:00	2021_03_21_bellows	3086	Carb	sample	Unknown	Bel	3800	187.35	20.2829	3.66e-12	0.001	0	-0.22	0	FALSE	C:\Nu Stable\Analyses\CLUMPED-SEQUENCES\Clumped NuCarb.seq	4	20	20	7.95e-08	7.95e-08	5.96533	0.000482331	0	5.38056	0.000856625	36.4569	0	15.6455	0.000457938	0	5.35141	0.000855811	21.1595	0.00698366	0	10.6203	0.0208075	0	-0.131458	0.81495	0	-0.327243	0.00676823	0	-0.109818
3091_D11792A-Pyc-kel-3	D11792A-Pyc-kel-3	2.02103e+07	2021-03-22 21:04:00	2021_03_21_bellows	3091	Carb	sample	Unknown	Bel	4000	198.15	20.1867	3.76e-12	0.001	0	0.2	0	FALSE	C:\Nu Stable\Analyses\CLUMPED-SEQUENCES\Clumped NuCarb + auto refill - short - 25nA.seq	4	20	20	7.96e-08	7.96e-08	2.21027	0.000561195	0	3.21639	0.000883113	34.2258	0	12.027	0.000540902	0	3.18156	0.000882611	15.2115	0.0073355	0	6.30493	0.0273595	0	-9.34407	0.846672	1	-0.362574	0.00709482	0	-0.0677698
3095_D8304-PycnspB-Nu-3	D8304-PycnspB-Nu-3	2.02103e+07	2021-03-23 05:33:00	2021_03_21_bellows	3095	Carb	sample	Unknown	Bel	4000	194.89	20.5244	3.67e-12	0.001	0	0.13	0	FALSE	C:\Nu Stable\Analyses\CLUMPED-SEQUENCES\Clumped NuCarb.seq	4	20	20	7.96e-08	7.95e-08	2.82905	0.000441979	0	5.72325	0.000772684	36.8102	0	12.6984	0.000422368	0	5.68713	0.000772045	18.4607	0.00713809	1	11.3441	0.0228538	0	0.134525	1.08664	1	-0.304116	0.00691405	1	-0.0616486
FULL STANDARDS DATASET (SEPARATED BY STANDARD)
Sample_ID	Name	Date	DateTime	BatchName	SCIPPnum	CarbORGas	Type	Type2	Mode	Weight (ug)	Trans_Pressure	Yield	NuYield	MaxPumpOverPressure	Chops	BalancePercent	Issue	autorefill	Sequence	NumBlocks	NumCycles	IntTime	sam44current	ref44current	d13C_PDB	d13C_err	d13C_rm	d18O_gasPDB	d18O_err	d18O_gasSMOW	d18O_rm	d45	d45_err	d45_rm	d46	d46_err	d47	d47_err	d47_rm	d48	d48_err	d48_rm	d49	d49_err	d49_rm	D47	D47_err	D47_rm	D48
EQUILIBRATED GAS STANDARDS (25C)
2732_SBDNB-EVAP-25C-4	SBDNB-EVAP-25C-4	2.02102e+07	2021-02-08 23:21:00	2020_02_08_bellows	2732	Gas	EG25C	Standard Gas	Bel	1924	286.38	6.71835	1.25e-11	0.001	0	-0.92	0	FALSE	C:\Nu Stable\Analyses\CLUMPED-SEQUENCES\Clumped Manifold - AP.SEQ	4	20	20	7.99e-08	7.99e-08	-10.6183	0.000462361	0	8.13127	0.00214356	39.2926	0	0.0951297	0.00044927	0	8.06433	0.00214141	8.01012	0.00640559	1	16.1129	0.0228409	0	-1.45692	0.784224	1	-0.0115263	0.00660018	0	-0.0794958
2769_SBDNB-MDIW-25C-4	SBDNB-MDIW-25C-4	2.02102e+07	2021-02-11 23:39:00	2020_02_08_bellows	2769	Gas	EG25C	Standard Gas	Bel	1208	162.93	7.41423	1.01e-11	0.001	0	-1.2	0	FALSE	C:\Nu Stable\Analyses\CLUMPED-SEQUENCES\Clumped Manifold - AP.SEQ	4	20	20	7.82e-08	7.84e-08	-10.5656	0.000474986	0	3.33537	0.00111169	34.3485	0	-0.0226661	0.000460911	0	3.27354	0.00111082	3.12442	0.00603965	1	6.57381	0.0243293	0	-9.04318	0.813357	1	-0.0693976	0.00614241	1	0.0159172
2810_SBDNB-2xEV-25C-10	SBDNB-2xEV-25C-10	2.02102e+07	2021-02-15 23:23:00	2021_02_14_bellows	2810	Gas	EG25C	Standard Gas	Bel	1720	229.86	7.48282	1.07e-11	0.001	0	-0.88	0	FALSE	C:\Nu Stable\Analyses\CLUMPED-SEQUENCES\Clumped Manifold - AP.SEQ	4	20	20	7.98e-08	7.98e-08	-10.5898	0.000445891	0	14.7972	0.00262174	46.1645	3	0.354477	0.000450994	0	14.7233	0.00261908	14.8427	0.00649007	0	29.5865	0.0231619	0	14.0064	0.900369	0	-0.00211883	0.00550232	0	-0.0840139
2850_SBDNB-2xEV-25C-2	SBDNB-2xEV-25C-2	2.02102e+07	2021-02-22 13:44:00	2021_02_21_bellows	2850	Gas	EG25C	Standard Gas	Bel	1637	217.38	7.53059	1.05e-11	0.001	0	-0.74	0	FALSE	C:\Nu Stable\Analyses\CLUMPED-SEQUENCES\Clumped Manifold - AP.SEQ	4	20	20	7.98e-08	7.98e-08	-10.7593	0.000439133	0	12.8859	0.00227502	44.1942	1	0.127933	0.000432684	0	12.8137	0.00227265	12.7097	0.00691931	1	25.6769	0.0251561	1	6.51438	0.865654	0	-0.0207258	0.00648968	0	-0.104781
2880_SBDNB-EVAP-25C-10	SBDNB-EVAP-25C-10	2.02102e+07	2021-02-24 21:32:00	2021_02_21_bellows	2880	Gas	EG25C	Standard Gas	Bel	1186	176.64	6.71422	1.13e-11	0.001	0	-0.78	0	FALSE	C:\Nu Stable\Analyses\CLUMPED-SEQUENCES\Clumped Manifold - AP.SEQ	4	20	20	7.96e-08	7.95e-08	-10.6413	0.00041163	0	8.05625	0.00107462	39.2153	0	0.0708268	0.000397515	0	7.98934	0.00107367	7.89683	0.00555677	0	16.062	0.0258264	0	2.96011	1.0314	0	-0.0286612	0.00572192	0	0.0191606
3010_SBDNB-EVAP-25C-7	SBDNB-EVAP-25C-7	2.02103e+07	2021-03-14 22:54:00	2021_03_14_bellows	3010	Gas	EG25C	Standard Gas	Bel	1909	286.47	6.66387	1.22e-11	0.001	0	0.25	0	FALSE	C:\Nu Stable\Analyses\CLUMPED-SEQUENCES\Clumped Manifold - AP.SEQ	4	20	20	7.99e-08	7.98e-08	-10.6247	0.000501938	0	8.14288	0.00126681	39.3046	0	0.0895417	0.000475909	0	8.07591	0.0012655	7.98967	0.00566304	0	16.1813	0.0223807	0	-6.8217	0.846792	0	-0.0402819	0.00552063	0	-0.0351573
3046_SBDNB-MDIW-25C-11	SBDNB-MDIW-25C-11	2.02103e+07	2021-03-17 18:31:00	2021_03_14_bellows	3046	Gas	EG25C	Standard Gas	Bel	1716	232.36	7.38509	1.05e-11	0.001	0	-0.15	0	FALSE	C:\Nu Stable\Analyses\CLUMPED-SEQUENCES\Clumped Manifold - AP.SEQ	4	20	20	7.98e-08	7.98e-08	-10.5922	0.000459089	0	2.14513	0.00171901	33.1214	0	-0.0894324	0.000426596	0	2.08448	0.00171705	1.88368	0.00609704	0	4.1732	0.0250851	0	-17.5455	0.852502	0	-0.0725098	0.00604878	0	-0.00983552
3078_SBDNB-MDIW-25C-10	SBDNB-MDIW-25C-10	2.02103e+07	2021-03-21 18:36:00	2021_03_21_bellows	3078	Gas	EG25C	Standard Gas	Bel	1480	217.29	6.81117	1.13e-11	0.001	0	-0.02	0	FALSE	C:\Nu Stable\Analyses\CLUMPED-SEQUENCES\Clumped Manifold - AP.SEQ	4	20	20	7.98e-08	7.97e-08	-10.5896	0.000511682	0	2.12884	0.000754599	33.1046	0	-0.087518	0.000485614	0	2.06821	0.000753899	1.86427	0.00663931	0	4.09386	0.021779	0	-20.7444	0.940914	0	-0.0778937	0.00662116	0	-0.0466563
200C HEATED GAS STANDARD
2754_SBDNB-2xEV-200C-2	SBDNB-2xEV-200C-2	2.02102e+07	2021-02-10 20:15:00	2020_02_08_bellows	2754	Gas	x200C	Standard Gas	Bel	1057	137.97	7.66109	9.56e-12	0.001	0	-1.1	0	FALSE	C:\Nu Stable\Analyses\CLUMPED-SEQUENCES\Clumped Manifold - AP.SEQ	4	20	20	6.21e-08	7.22e-08	-10.723	0.00246109	0	12.1976	0.00441461	43.4846	0	0.138168	0.00247146	0	12.1262	0.00441527	11.649	0.0108794	2	24.2534	0.0288952	0	11.2603	1.11693	0	-0.412933	0.00745156	0	-0.142494
2797_SBDNB-EVAP-200C-5	SBDNB-EVAP-200C-5	2.02102e+07	2021-02-14 21:34:00	2021_02_14_bellows	2797	Gas	x200C	Standard Gas	Bel	1865	271.12	6.87887	1.21e-11	0.001	0	-1.09	0	FALSE	C:\Nu Stable\Analyses\CLUMPED-SEQUENCES\Clumped Manifold - AP.SEQ	4	20	20	7.99e-08	7.98e-08	-10.6116	0.00046516	0	7.84043	0.00266007	38.9928	7	0.0918013	0.000440953	0	7.7738	0.00265733	7.26025	0.00742979	2	15.3701	0.0256491	0	0.439188	0.745259	0	-0.480083	0.00588924	0	-0.261768
2840_SBDNB-EVAP-200C-2	SBDNB-EVAP-200C-2	2.02102e+07	2021-02-21 17:50:00	2021_02_21_bellows	2840	Gas	x200C	Standard Gas	Bel	1921	282.17	6.80795	1.23e-11	0.001	0	-0.55	0	FALSE	C:\Nu Stable\Analyses\CLUMPED-SEQUENCES\Clumped Manifold - AP.SEQ	4	20	20	7.99e-08	7.99e-08	-10.691	0.000484876	0	6.87256	0.00270632	37.995	6	-0.016999	0.000443515	0	6.80678	0.00270299	6.14569	0.00679342	1	13.3779	0.0246067	0	-12.0333	0.912198	0	-0.531134	0.00649219	0	-0.300862
2895_SBDNB-2xEV-200C-3	SBDNB-2xEV-200C-3	2.02102e+07	2021-02-26 04:23:00	2021_02_21_bellows	2895	Gas	x200C	Standard Gas	Bel	1946	283.11	6.87365	1.23e-11	0.001	0	-0.49	0	FALSE	C:\Nu Stable\Analyses\CLUMPED-SEQUENCES\Clumped Manifold - AP.SEQ	4	20	20	7.99e-08	7.98e-08	-10.6828	0.000710916	0	13.8366	0.00292512	45.1743	7	0.233636	0.000630494	0	13.7634	0.00292196	13.2806	0.00730998	1	27.4577	0.0244771	0	10.5758	0.774313	0	-0.497069	0.0069317	1	-0.280942
2912_SBDNB-MDIW-200C-1	SBDNB-MDIW-200C-1	2.02102e+07	2021-02-28 18:39:00	2021_02_28_bellows	2912	Gas	x200C	Standard Gas	Bel	2487	373.08	6.66613	1.36e-11	0.001	0	-0.44	0	FALSE	C:\Nu Stable\Analyses\CLUMPED-SEQUENCES\Clumped Manifold - AP.SEQ	4	20	20	7.99e-08	7.99e-08	-10.6766	0.00058861	0	0.756695	0.00303986	31.6901	10	-0.216756	0.000464876	0	0.69715	0.00303616	-0.0250082	0.00779274	7	1.23011	0.0277325	1	-26.6055	1.01024	1	-0.488138	0.00648868	1	-0.21553
3019_SBDNB-2xEV-200C-7	SBDNB-2xEV-200C-7	2.02103e+07	2021-03-15 15:47:00	2021_03_14_bellows	3019	Gas	x200C	Standard Gas	Bel	1592	215.27	7.39536	1.03e-11	0.001	0	-0.12	0	FALSE	C:\Nu Stable\Analyses\CLUMPED-SEQUENCES\Clumped Manifold - AP.SEQ	4	20	20	7.97e-08	7.97e-08	-10.5955	0.000489793	0	14.7427	0.000927225	46.1084	0	0.347049	0.00046979	0	14.6689	0.00092652	14.2738	0.00642283	0	29.3309	0.0239531	0	5.50474	0.963149	0	-0.497724	0.00616164	0	-0.215637
3089_SBDNB-2xEV-200C-4	SBDNB-2xEV-200C-4	2.02103e+07	2021-03-22 16:52:00	2021_03_21_bellows	3089	Gas	x200C	Standard Gas	Bel	1263	160.06	7.89079	9.18e-12	0.001	0	-0.28	0	FALSE	C:\Nu Stable\Analyses\CLUMPED-SEQUENCES\Clumped Manifold - AP.SEQ	4	20	20	7.28e-08	7.31e-08	-10.7055	0.000541942	0	13.6665	0.000780007	44.9989	0	0.205862	0.000516865	0	13.5935	0.00077944	13.0574	0.00610729	0	27.1745	0.0227718	0	7.0141	0.844019	1	-0.509905	0.00590239	0	-0.192013
1000C HEATED GAS STANDARD
2744_SBDNB-MDIW-1000C-5	SBDNB-MDIW-1000C-5	20210210	2021-02-10 00:14:00	2020_02_08_bellows	2744	Gas	HG	Standard Gas	Bel	1663	243.35	6.83378	1.19e-11	0.001	0	-1.07	0	FALSE	C:\Nu Stable\Analyses\CLUMPED-SEQUENCES\Clumped Manifold - AP.SEQ	4	20	20	7.99e-08	7.98e-08	-10.5726	0.000483	0	-2.2577	0.00231233	28.5825	2	-0.224997	0.000473732	0	-2.31388	0.00230982	-3.37478	0.00718041	0	-4.8899	0.0227951	0	-20.2047	0.752412	1	-0.873961	0.0067677	0	-0.275098
2819_SBDNB-MDIW-1000C-4	SBDNB-MDIW-1000C-4	2.02102e+07	2021-02-16 15:43:00	2021_02_14_bellows	2819	Gas	HG	Standard Gas	Bel	1414	187.13	7.55624	1.02e-11	0.001	0	-1.26	0	FALSE	C:\Nu Stable\Analyses\CLUMPED-SEQUENCES\Clumped Manifold - AP.SEQ	4	20	20	7.96e-08	7.95e-08	-10.6596	0.000544774	0	-4.51764	0.00189768	26.2527	0	-0.386508	0.000522844	0	-4.57165	0.00189578	-5.73861	0.00624103	2	-9.36476	0.0244904	0	-22.1127	0.958734	2	-0.852173	0.00608691	2	-0.244606
2862_SBDNB-MDIW-1000C-6	SBDNB-MDIW-1000C-6	2.02102e+07	2021-02-23 11:48:00	2021_02_21_bellows	2862	Gas	HG	Standard Gas	Bel	1070	137.88	7.76037	9.33e-12	0.001	0	-1.22	0	FALSE	C:\Nu Stable\Analyses\CLUMPED-SEQUENCES\Clumped Manifold - AP.SEQ	4	20	20	6.18e-08	7.41e-08	-10.4983	0.00232214	0	-4.59605	0.00469119	26.1719	0	-0.237085	0.00234806	0	-4.64964	0.00469092	-5.63366	0.0106132	2	-9.3989	0.0293186	0	-11.1765	1.05585	1	-0.822156	0.00706735	0	-0.122385
2924_SBDNB-2xEV-1000C-6	SBDNB-2xEV-1000C-6	2.02103e+07	2021-03-01 17:21:00	2021_02_28_bellows	2924	Gas	HG	In house standard	Bel	1534	222.78	6.88572	1.15e-11	0.001	0	-0.96	0	FALSE	C:\Nu Stable\Analyses\CLUMPED-SEQUENCES\Clumped Manifold - AP.SEQ	4	20	20	7.98e-08	7.98e-08	-10.6162	0.000476856	0	11.8471	0.0025744	43.1233	2	0.226863	0.000470554	0	11.7762	0.00257171	10.9752	0.00771349	2	23.364	0.0244448	0	13.003	1.11919	1	-0.828828	0.0070503	2	-0.326206
3028_SBDNB-MDIW-1000C-6	SBDNB-MDIW-1000C-6	2.02103e+07	2021-03-16 10:32:00	2021_03_14_bellows	3028	Gas	HG	Standard Gas	Bel	936	115.84	8.08011	8.52e-12	0.001	0	-0.68	0	FALSE	C:\Nu Stable\Analyses\CLUMPED-SEQUENCES\Clumped Manifold - AP.SEQ	4	20	20	4.78e-08	4.8e-08	-10.6126	0.000566901	0	-1.92043	0.000849137	28.9302	0	-0.251068	0.000541328	0	-1.97705	0.000848478	-3.06786	0.00865707	1	-4.26039	0.0300842	0	-25.7707	1.30362	0	-0.86782	0.00886474	1	-0.311424
3058_SBDNB-2xEV-1000C-4	SBDNB-2xEV-1000C-4	2.02103e+07	2021-03-18 15:43:00	2021_03_14_bellows	3058	Gas	HG	In house standard	Bel	2080	292.24	7.11744	1.15e-11	0.001	0	-0.05	0	FALSE	C:\Nu Stable\Analyses\CLUMPED-SEQUENCES\Clumped Manifold - AP.SEQ	4	20	20	7.99e-08	7.99e-08	-10.6267	0.000499685	0	10.391	0.00243961	41.6222	1	0.166152	0.000441068	0	10.3216	0.00243675	9.44448	0.00639908	1	20.4251	0.0254856	1	1.57663	1.18465	1	-0.865011	0.00620433	1	-0.320474
ETH1 - CARBONATE STANDARD
2674_ETH1-1	ETH1-1	2.02102e+07	2021-02-03 04:36:00	2021_02_02_bellows	2674	Carb	ETH1	ETH carbonate standard	Bel	3800	182.59	20.8117	3.64e-12	0.001	0	-1.65	0	FALSE	C:\Nu Stable\Analyses\CLUMPED-SEQUENCES\Clumped NuCarb.seq	4	20	20	7.95e-08	7.95e-08	2.18079	0.000497184	0	6.34769	0.000710349	37.4539	0	12.1086	0.000472807	0	6.30957	0.000709748	18.1118	0.00570074	1	12.4848	0.0274753	0	6.88846	0.729727	1	-0.653537	0.00578395	1	-0.17182
2679_ETH1-2	ETH1-2	2.02102e+07	2021-02-03 13:58:00	2021_02_02_bellows	2679	Carb	ETH1	ETH carbonate standard	Bel	3700	173.61	21.3121	3.53e-12	0.001	0	-1.76	0	FALSE	C:\Nu Stable\Analyses\CLUMPED-SEQUENCES\Clumped NuCarb.seq	4	20	20	7.97e-08	7.96e-08	2.18279	0.000590117	0	6.46969	0.00134227	37.5797	0	12.1148	0.00057741	0	6.43145	0.0013414	18.2318	0.00647586	0	12.7119	0.0223499	0	4.74572	0.78385	1	-0.661021	0.00630835	0	-0.189768
2686_ETH1-3	ETH1-3	2.02102e+07	2021-02-04 02:25:00	2021_02_02_bellows	2686	Carb	ETH1	ETH carbonate standard	Bel	3400	157.99	21.5203	3.44e-12	0.001	0	-1.84	0	FALSE	C:\Nu Stable\Analyses\CLUMPED-SEQUENCES\Clumped NuCarb.seq	4	20	20	7.42e-08	7.44e-08	2.17782	0.000539614	0	6.34593	0.00117419	37.4521	0	12.1057	0.000528585	0	6.3078	0.00117349	18.1088	0.00691761	0	12.4987	0.0232125	0	5.97388	0.81719	0	-0.651844	0.00640197	0	-0.154602
2698_ETH1-4	ETH1-4	2.02102e+07	2021-02-04 23:48:00	2021_02_02_bellows	2698	Carb	ETH1	ETH carbonate standard	Bel	3500	171.6	20.3963	3.64e-12	0.001	0	-9.29	0	FALSE	C:\Nu Stable\Analyses\CLUMPED-SEQUENCES\Clumped NuCarb.seq	4	20	20	7.96e-08	1.08e-07	2.32152	0.00231823	0	6.57396	0.0039712	37.6872	1	12.2492	0.00233839	0	6.5359	0.00397132	18.473	0.00804165	1	13.3218	0.0237283	0	30.4741	0.854655	0	-0.663738	0.00577013	0	0.209007
2712_ETH1-5	ETH1-5	2.02102e+07	2021-02-06 00:58:00	2021_02_02_bellows	2712	Carb	ETH1	ETH carbonate standard	Bel	3600	170.87	21.0686	3.57e-12	0.001	0	-3.14	0	FALSE	C:\Nu Stable\Analyses\CLUMPED-SEQUENCES\Clumped NuCarb + auto refill - short.seq	4	20	20	7.97e-08	9.64e-08	2.26274	0.00102134	0	6.41076	0.00113229	37.5189	1	12.1881	0.00102059	0	6.37275	0.00113211	18.25	0.00662885	2	12.9047	0.025159	0	19.5786	0.755244	0	-0.661935	0.00623638	1	0.120206
2740_ETH1-1	ETH1-1	2.02102e+07	2021-02-09 16:26:00	2020_02_08_bellows	2740	Carb	ETH1	ETH carbonate standard	Bel	3300	148.77	22.1819	3.34e-12	0.001	0	-1.15	0	FALSE	C:\Nu Stable\Analyses\CLUMPED-SEQUENCES\Clumped NuCarb + auto refill - short.seq	4	20	20	6.9e-08	6.95e-08	2.06983	0.00059379	0	6.18584	0.00097964	37.287	0	11.9983	0.000572394	0	6.14765	0.000979043	17.8726	0.00731206	0	12.2154	0.0253834	0	9.11162	0.871018	0	-0.61784	0.00694727	0	-0.116125
2757_ETH1-2	ETH1-2	2.02102e+07	2021-02-11 01:38:00	2020_02_08_bellows	2757	Carb	ETH1	ETH carbonate standard	Bel	3700	159.18	23.2441	3.21e-12	0.001	0	-1.09	0	FALSE	C:\Nu Stable\Analyses\CLUMPED-SEQUENCES\Clumped NuCarb.seq	4	20	20	7.54e-08	7.57e-08	2.15906	0.000585467	2	6.44791	0.000872998	37.5572	2	12.0916	0.000562673	2	6.40964	0.000872487	18.2436	0.00761045	2	12.7052	0.0216903	2	15.2715	0.900965	1	-0.602562	0.00733754	0	-0.144867
2766_ETH1-3	ETH1-3	2.02102e+07	2021-02-11 18:21:00	2020_02_08_bellows	2766	Carb	ETH1	ETH carbonate standard	Bel	3700	167.36	22.108	3.41e-12	0.001	0	-1.05	0	FALSE	C:\Nu Stable\Analyses\CLUMPED-SEQUENCES\Clumped NuCarb.seq	4	20	20	7.97e-08	7.97e-08	2.11811	0.000563306	0	6.31483	0.00083017	37.42	0	12.0483	0.000548664	0	6.27661	0.000829999	18.0376	0.00568483	0	12.4792	0.023231	0	14.1809	0.997784	0	-0.632715	0.00555378	0	-0.111905
2790_ETH1-4	ETH1-4	2.02102e+07	2021-02-13 12:38:00	2020_02_08_bellows	2790	Carb	ETH1	ETH carbonate standard	Bel	3700	155.58	23.782	3.11e-12	0.001	0	-1.08	0	FALSE	C:\Nu Stable\Analyses\CLUMPED-SEQUENCES\Clumped NuCarb.seq	4	20	20	7.3e-08	7.33e-08	2.23575	0.000532118	0	6.62154	0.000779513	37.7362	0	12.17	0.000507071	0	6.58326	0.000778889	18.4462	0.00687003	0	13.0244	0.0242988	0	6.40153	0.99618	0	-0.655085	0.00683359	0	-0.182968
2796_ETH1-1	ETH1-1	2.02102e+07	2021-02-14 19:46:00	2021_02_14_bellows	2796	Carb	ETH1	ETH carbonate standard	Bel	3700	176.24	20.9941	3.64e-12	0.001	0	-0.7	0	FALSE	C:\Nu Stable\Analyses\CLUMPED-SEQUENCES\Clumped NuCarb + auto refill - short.seq	4	20	20	7.96e-08	7.95e-08	2.1009	0.000450989	0	6.23988	0.000876394	37.3428	0	12.0295	0.000432432	0	6.2017	0.000875675	17.9198	0.00735683	3	12.2877	0.0247659	0	4.4854	0.896154	1	-0.656056	0.00743484	3	-0.152197
2832_ETH1-1	ETH1-1	2.02102e+07	2021-02-19 10:23:00	2021_02_18_bellows	2832	Carb	ETH1	ETH carbonate standard	Bel	3700	174.32	21.2253	3.57e-12	0.001	0	-0.63	0	FALSE	C:\Nu Stable\Analyses\CLUMPED-SEQUENCES\Clumped NuCarb.seq	4	20	20	7.97e-08	7.96e-08	2.15207	0.00057379	0	6.25246	0.00115797	37.3557	0	12.0782	0.000546614	0	6.21438	0.00115689	18.0415	0.00704545	0	12.3839	0.0205789	0	20.594	1.01754	0	-0.598554	0.00696597	0	-0.0823353
2852_ETH1-1	ETH1-1	2.02102e+07	2021-02-22 17:19:00	2021_02_21_bellows	2852	Carb	ETH1	ETH carbonate standard	Bel	3800	189.88	20.0126	3.82e-12	0.001	0	-0.69	0	FALSE	C:\Nu Stable\Analyses\CLUMPED-SEQUENCES\Clumped NuCarb.seq	4	20	20	7.96e-08	7.95e-08	2.12609	0.000543744	0	6.33064	0.00173993	37.4363	0	12.0564	0.000528856	0	6.29242	0.00173838	18.0504	0.00694666	0	12.4853	0.0248152	0	13.1051	0.987695	0	-0.643858	0.00693894	0	-0.137326
2869_ETH1-2	ETH1-2	2.02102e+07	2021-02-24 01:58:00	2021_02_21_bellows	2869	Carb	ETH1	ETH carbonate standard	Bel	3900	170.78	22.8364	3.31e-12	0.001	0	-0.66	0	FALSE	C:\Nu Stable\Analyses\CLUMPED-SEQUENCES\Clumped NuCarb.seq	4	20	20	7.97e-08	7.97e-08	2.00199	0.000448766	0	5.91395	0.000701451	37.0067	0	11.9248	0.000426669	0	5.8759	0.000700829	17.5223	0.00693972	0	11.6592	0.022597	0	11.5231	1.00546	0	-0.621532	0.0067211	0	-0.12551
2877_ETH1-3	ETH1-3	2.02102e+07	2021-02-24 16:15:00	2021_02_21_bellows	2877	Carb	ETH1	ETH carbonate standard	Bel	3700	175.66	21.0634	3.6e-12	0.0058822	0	-0.82	0	FALSE	C:\Nu Stable\Analyses\CLUMPED-SEQUENCES\Clumped NuCarb.seq	4	20	20	7.96e-08	7.95e-08	2.03404	0.000463052	0	6.11868	0.00140582	37.2178	0	11.9622	0.000453091	0	6.08049	0.00140464	17.7446	0.00647122	1	12.0646	0.0216131	0	16.3902	0.766642	1	-0.638645	0.00614954	0	-0.131669
2893_ETH1-4	ETH1-4	20210226	2021-02-26 00:10:00	2021_02_21_bellows	2893	Carb	ETH1	ETH carbonate standard	Bel	3800	162.69	23.3573	3.21e-12	0.0011652	0	-0.84	0	FALSE	C:\Nu Stable\Analyses\CLUMPED-SEQUENCES\Clumped NuCarb.seq	4	20	20	7.85e-08	7.87e-08	2.03891	0.000484379	0	6.03195	0.00137959	37.1284	0	11.9637	0.000472955	0	5.99385	0.00137846	17.6705	0.00634321	0	11.9037	0.0208638	0	15.9125	0.827547	1	-0.630892	0.00612922	0	-0.118434
2921_ETH1-1	ETH1-1	2.02103e+07	2021-03-01 12:01:00	2021_02_28_bellows	2921	Carb	ETH1	ETH carbonate standard	Bel	3800	181.92	20.8883	3.67e-12	0.001	0	-0.93	0	FALSE	C:\Nu Stable\Analyses\CLUMPED-SEQUENCES\Clumped NuCarb.seq	4	20	20	7.95e-08	7.95e-08	2.11366	0.000523078	0	6.34277	0.00112796	37.4488	0	12.0451	0.000500807	0	6.30452	0.00112696	18.0567	0.00667376	1	12.5785	0.023967	0	10.2341	1.04409	2	-0.638002	0.00659132	1	-0.0693063
2939_ETH1-2	ETH1-2	2.02103e+07	2021-03-02 19:33:00	2021_02_28_bellows	2939	Carb	ETH1	ETH carbonate standard	Bel	3700	177.25	20.8745	3.65e-12	0.001	0	-1.01	0	FALSE	C:\Nu Stable\Analyses\CLUMPED-SEQUENCES\Clumped NuCarb.seq	4	20	20	7.95e-08	7.95e-08	2.09469	0.000464206	0	6.25601	0.000708246	37.3594	0	12.0242	0.000439456	0	6.2178	0.000707549	17.9384	0.00674654	0	12.3769	0.0231618	0	11.3269	0.873083	0	-0.648067	0.00668655	0	-0.0960295
2952_ETH1-1	ETH1-1	2.02103e+07	2021-03-10 02:32:00	2021_03_09_bellows	2952	Carb	ETH1	ETH carbonate standard	Bel	3400	165.41	20.555	3.52e-12	0.001	0	-0.37	0	TRUE	C:\Nu Stable\Analyses\CLUMPED-SEQUENCES\Clumped NuCarb.seq	4	20	20	7.62e-08	7.64e-08	2.23893	0.000579136	0	6.65215	0.000948196	37.7678	0	12.1741	0.000565333	0	6.61384	0.000947893	18.4661	0.0058441	0	13.0369	0.0235746	0	4.75478	0.909541	0	-0.669489	0.00564924	0	-0.231314
2964_ETH1-2	ETH1-2	20210311	2021-03-11 00:22:00	2021_03_09_bellows	2964	Carb	ETH1	ETH carbonate standard	Bel	3700	188.81	19.5964	3.78e-12	0.001	0	-0.27	0	TRUE	C:\Nu Stable\Analyses\CLUMPED-SEQUENCES\Clumped NuCarb.seq	4	20	20	7.95e-08	7.95e-08	2.24078	0.000518598	0	6.68781	0.00223518	37.8045	0	12.1771	0.000514772	0	6.64947	0.00223316	18.4946	0.00653905	0	13.127	0.0237624	0	0.663958	0.943778	0	-0.679348	0.00568556	0	-0.213202
2975_ETH1-3	ETH1-3	2.02103e+07	2021-03-11 21:53:00	2021_03_09_bellows	2975	Carb	ETH1	ETH carbonate standard	Bel	3900	193.48	20.1571	3.74e-12	0.001	0	-0.26	0	TRUE	C:\Nu Stable\Analyses\CLUMPED-SEQUENCES\Clumped NuCarb + auto refill - short - 25nA.seq	4	20	20	7.96e-08	7.96e-08	2.25052	0.000486099	0	6.66166	0.00125278	37.7776	0	12.1854	0.000454676	0	6.62336	0.00125135	18.4564	0.00698798	0	13.0715	0.0243025	0	-2.631	0.829157	1	-0.699777	0.00689762	0	-0.216061
2983_ETH1-4	ETH1-4	2.02103e+07	2021-03-12 14:07:00	2021_03_09_bellows	2983	Carb	ETH1	ETH carbonate standard	Bel	3600	178.62	20.1545	3.67e-12	0.001	0	-0.21	0	TRUE	C:\Nu Stable\Analyses\CLUMPED-SEQUENCES\Clumped NuCarb.seq	4	20	20	7.97e-08	7.96e-08	2.23229	0.000388522	0	6.6673	0.00184054	37.7834	0	12.1684	0.000376128	0	6.62896	0.00183869	18.4546	0.0068823	0	13.1176	0.0214246	0	-0.445371	0.807822	0	-0.689729	0.00635712	0	-0.181758
2991_ETH1-5	ETH1-5	2.02103e+07	2021-03-13 06:17:00	2021_03_09_bellows	2991	Carb	ETH1	ETH carbonate standard	Bel	3600	186.49	19.304	3.87e-12	0.001	0	-0.38	0	TRUE	C:\Nu Stable\Analyses\CLUMPED-SEQUENCES\Clumped NuCarb.seq	4	20	20	7.95e-08	7.95e-08	2.2397	0.00051285	0	6.66248	0.000968656	37.7784	0	12.1752	0.000496029	0	6.62416	0.000968015	18.465	0.00630079	0	13.1399	0.0214546	0	0.157101	0.788616	0	-0.681816	0.00621805	0	-0.150147
3018_ETH1-1	ETH1-1	2.02103e+07	2021-03-15 14:00:00	2021_03_14_bellows	3018	Carb	ETH1	ETH carbonate standard	Bel	3500	184.78	18.9414	3.96e-12	0.001	0	-0.25	0	FALSE	C:\Nu Stable\Analyses\CLUMPED-SEQUENCES\Clumped NuCarb + auto refill - short - 25nA.seq	4	20	20	7.96e-08	7.95e-08	2.20783	0.00042723	0	6.581	0.00104284	37.6944	0	12.1423	0.000410419	0	6.5427	0.00104191	18.3409	0.00668359	0	12.9822	0.0203614	0	-5.75943	0.867469	0	-0.690563	0.00692053	0	-0.144027
3027_ETH1-2	ETH1-2	2.02103e+07	2021-03-16 08:43:00	2021_03_14_bellows	3027	Carb	ETH1	ETH carbonate standard	Bel	3800	192.26	19.7649	3.82e-12	0.001	0	-0.17	0	FALSE	C:\Nu Stable\Analyses\CLUMPED-SEQUENCES\Clumped NuCarb + auto refill - short - 25nA.seq	4	20	20	7.96e-08	7.95e-08	2.21175	0.000547647	0	6.56389	0.000936849	37.6768	0	12.1454	0.000521888	0	6.52561	0.000936033	18.314	0.00628166	1	12.9	0.0233691	0	-5.2985	0.88312	0	-0.70097	0.00632976	0	-0.191202
3053_ETH1-3	ETH1-3	2.02103e+07	2021-03-18 06:52:00	2021_03_14_bellows	3053	Carb	ETH1	ETH carbonate standard	Bel	3900	202.48	19.2612	3.95e-12	0.001	0	-0.19	0	FALSE	C:\Nu Stable\Analyses\CLUMPED-SEQUENCES\Clumped NuCarb.seq	4	20	20	7.96e-08	7.96e-08	2.23387	0.000439008	0	6.65433	0.000809169	37.77	0	12.1694	0.000414079	0	6.616	0.000808302	18.4523	0.00670317	0	13.0519	0.0196209	0	1.64284	0.920747	0	-0.680421	0.00672589	0	-0.22081
3069_ETH1-4	ETH1-4	2.02103e+07	2021-03-19 12:39:00	2021_03_14_bellows	3069	Carb	ETH1	ETH carbonate standard	Bel	3500	179.26	19.5247	3.82e-12	0.001	0	-0.2	0	FALSE	C:\Nu Stable\Analyses\CLUMPED-SEQUENCES\Clumped NuCarb + auto refill - short - 25nA.seq	4	20	20	7.97e-08	7.96e-08	2.2187	0.000400802	0	6.59867	0.00072523	37.7126	0	12.1531	0.000382037	0	6.56037	0.000724586	18.3686	0.0068537	0	12.9695	0.0213941	0	-0.891374	1.05922	0	-0.691634	0.00672313	0	-0.191642
3088_ETH1-1	ETH1-1	2.02103e+07	2021-03-22 15:04:00	2021_03_21_bellows	3088	Carb	ETH1	ETH carbonate standard	Bel	3600	180.57	19.9369	3.71e-12	0.001	0	-0.16	0	FALSE	C:\Nu Stable\Analyses\CLUMPED-SEQUENCES\Clumped NuCarb + auto refill - short - 25nA.seq	4	20	20	7.97e-08	7.96e-08	2.23454	0.000451288	0	6.65877	0.00101091	37.7746	0	12.1702	0.000426154	0	6.62044	0.00100984	18.4428	0.00637189	0	13.0826	0.0243549	0	-3.50306	0.802645	0	-0.694847	0.0063989	0	-0.199311
3103_ETH1-2	ETH1-2	2.02103e+07	2021-03-23 20:20:00	2021_03_21_bellows	3103	Carb	ETH1	ETH carbonate standard	Bel	3600	180.45	19.9501	3.72e-12	0.001	0	-0.17	0	FALSE	C:\Nu Stable\Analyses\CLUMPED-SEQUENCES\Clumped NuCarb.seq	4	20	20	7.97e-08	7.96e-08	2.27048	0.000474562	0	6.73859	0.000775256	37.8569	0	12.2069	0.000451452	0	6.70025	0.000774566	18.5662	0.00696413	0	13.2953	0.019894	0	-2.27029	0.909906	0	-0.689079	0.00682439	0	-0.147999
ETH2 - CARBONATE STANDARD
2671_ETH2-1	ETH2-1	2.02102e+07	2021-02-02 21:53:00	2021_02_02_bellows	2671	Carb	ETH2	ETH carbonate standard	Bel	3800	180.57	21.0445	3.59e-12	0.001	0	-0.48	0	FALSE	C:\Nu Stable\Analyses\CLUMPED-SEQUENCES\Clumped NuCarb.seq	4	20	20	7.95e-08	7.95e-08	-9.90023	0.000523647	0	-9.94871	0.000994015	20.6538	0	0.13901	0.000506615	0	-9.99546	0.000993338	-10.3929	0.00696448	0	-19.9753	0.0204108	0	-38.2929	0.712388	1	-0.715786	0.00679866	0	-0.0860202
2683_ETH2-2	ETH2-2	2.02102e+07	2021-02-03 21:06:00	2021_02_02_bellows	2683	Carb	ETH2	ETH carbonate standard	Bel	3700	165.16	22.4025	3.32e-12	0.001	0	-1.77	0	FALSE	C:\Nu Stable\Analyses\CLUMPED-SEQUENCES\Clumped NuCarb.seq	4	20	20	7.93e-08	7.94e-08	-9.9606	0.000551283	0	-10.2757	0.0010979	20.3167	0	0.0705473	0.000537144	0	-10.3222	0.00109723	-10.7545	0.00651918	0	-20.4902	0.0240083	0	-27.9767	0.804595	0	-0.686133	0.00651935	0	0.0485873
2687_ETH2-3	ETH2-3	2.02102e+07	2021-02-04 04:12:00	2021_02_02_bellows	2687	Carb	ETH2	ETH carbonate standard	Bel	3600	164.15	21.9312	3.39e-12	0.001	0	-1.8	0	FALSE	C:\Nu Stable\Analyses\CLUMPED-SEQUENCES\Clumped NuCarb + auto refill - short.seq	4	20	20	7.84e-08	7.86e-08	-9.97045	0.000563436	0	-10.3317	0.0011316	20.2589	0	0.0592787	0.000552662	0	-10.3782	0.00113101	-10.8316	0.00597859	1	-20.6503	0.0247002	0	-32.5107	0.803351	0	-0.696656	0.00603869	1	-0.00166667
2705_ETH2-4	ETH2-4	2.02102e+07	2021-02-05 12:23:00	2021_02_02_bellows	2705	Carb	ETH2	ETH carbonate standard	Bel	3500	167.57	20.8868	3.57e-12	0.001	0	-1.72	0	FALSE	C:\Nu Stable\Analyses\CLUMPED-SEQUENCES\Clumped NuCarb.seq	4	20	20	7.96e-08	7.96e-08	-9.97778	0.000511126	0	-10.4247	0.000943715	20.1631	0	0.04909	0.000487875	0	-10.4711	0.000942876	-10.9241	0.00697222	0	-20.7562	0.0246342	0	-29.1848	0.87446	0	-0.687508	0.00720906	0	0.0780679
2721_ETH2-5	ETH2-5	2.02102e+07	2021-02-06 17:19:00	2021_02_02_bellows	2721	Carb	ETH2	ETH carbonate standard	Bel	3500	164	21.3415	3.5e-12	0.001	0	-3.86	0	FALSE	C:\Nu Stable\Analyses\CLUMPED-SEQUENCES\Clumped NuCarb.seq	4	20	20	7.79e-08	9.66e-08	-9.86851	0.00134777	0	-10.1249	0.00235535	20.4721	1	0.162683	0.00136215	0	-10.1714	0.00235501	-10.5061	0.00733439	0	-20.0206	0.0233646	0	-17.3546	0.810566	0	-0.678418	0.00688511	0	0.22637
2731_ETH2-1	ETH2-1	2.02102e+07	2021-02-08 21:36:00	2020_02_08_bellows	2731	Carb	ETH2	ETH carbonate standard	Bel	3400	160.98	21.1206	3.53e-12	0.001	0	-1.29	0	FALSE	C:\Nu Stable\Analyses\CLUMPED-SEQUENCES\Clumped NuCarb.seq	4	20	20	7.65e-08	7.7e-08	-9.93266	0.000530934	0	-10.0868	0.000810661	20.5114	0	0.10356	0.000512304	0	-10.1334	0.000810231	-10.4975	0.00690774	0	-20.2	0.0245453	0	-29.7462	0.866161	0	-0.647941	0.00663957	0	-0.0365244
2758_ETH2-2	ETH2-2	2.02102e+07	2021-02-11 03:24:00	2020_02_08_bellows	2758	Carb	ETH2	ETH carbonate standard	Bel	3500	149.08	23.4773	3.15e-12	0.001	0	-1.11	0	FALSE	C:\Nu Stable\Analyses\CLUMPED-SEQUENCES\Clumped NuCarb.seq	4	20	20	6.92e-08	6.99e-08	-10.0365	0.000625015	0	-10.4366	0.00127555	20.1508	0	-0.00675512	0.000615443	0	-10.4831	0.00127493	-10.95	0.00609218	0	-20.8315	0.0238754	0	-26.199	1.00146	0	-0.644109	0.00588556	0	0.0254479
2774_ETH2-3	ETH2-3	2.02102e+07	2021-02-12 08:32:00	2020_02_08_bellows	2774	Carb	ETH2	ETH carbonate standard	Bel	3400	156.28	21.7558	3.43e-12	0.001	0	-0.69	0	FALSE	C:\Nu Stable\Analyses\CLUMPED-SEQUENCES\Clumped NuCarb.seq	4	20	20	7.37e-08	7.4e-08	-9.99625	0.000469915	0	-10.2676	0.000840729	20.325	0	0.0371925	0.000450643	0	-10.3142	0.000840062	-10.7643	0.00680128	1	-20.5565	0.0260725	0	-29.2908	1.05785	1	-0.669585	0.00668111	1	-0.035148
2783_ETH2-4	ETH2-4	20210213	2021-02-13 00:15:00	2020_02_08_bellows	2783	Carb	ETH2	ETH carbonate standard	Bel	3700	172.49	21.4505	3.55e-12	0.0042936	0	-1.09	0	FALSE	C:\Nu Stable\Analyses\CLUMPED-SEQUENCES\Clumped NuCarb.seq	4	20	20	7.97e-08	7.96e-08	-9.9658	0.000495829	0	-10.1358	0.000812778	20.4609	0	0.0705664	0.000477342	0	-10.1825	0.000812248	-10.6058	0.00667352	0	-20.3233	0.024124	0	-33.5924	1.03107	0	-0.674602	0.00696288	0	-0.0632178
2805_ETH2-1	ETH2-1	2.02102e+07	2021-02-15 13:08:00	2021_02_14_bellows	2805	Carb	ETH2	ETH carbonate standard	Bel	3500	175.02	19.9977	3.82e-12	0.001	0	-1.06	0	FALSE	C:\Nu Stable\Analyses\CLUMPED-SEQUENCES\Clumped NuCarb.seq	4	20	20	7.96e-08	7.96e-08	-9.91992	0.000612585	0	-10.0526	0.00146808	20.5467	0	0.116783	0.000600032	0	-10.0992	0.00146705	-10.4831	0.0062989	0	-20.182	0.0237562	0	-34.3132	0.826834	0	-0.680956	0.00657261	0	-0.0872857
2815_ETH2-2	ETH2-2	2.02102e+07	2021-02-16 07:55:00	2021_02_14_bellows	2815	Carb	ETH2	ETH carbonate standard	Bel	3500	176.97	19.7774	3.85e-12	0.001	0	-1.13	0	FALSE	C:\Nu Stable\Analyses\CLUMPED-SEQUENCES\Clumped NuCarb.seq	4	20	20	7.96e-08	7.95e-08	-9.8851	0.000457529	0	-9.97225	0.000969159	20.6295	0	0.152456	0.000439445	0	-10.0189	0.00096833	-10.3722	0.00686586	1	-20.027	0.0212251	0	-34.9056	0.810595	1	-0.685279	0.00688352	1	-0.0913075
2824_ETH2-1	ETH2-1	2.02102e+07	2021-02-18 18:01:00	2021_02_18_bellows	2824	Carb	ETH2	ETH carbonate standard	Bel	3800	161.41	23.5425	3.18e-12	0.001	0	-0.6	0	FALSE	C:\Nu Stable\Analyses\CLUMPED-SEQUENCES\Clumped NuCarb + auto refill - short.seq	4	20	20	7.76e-08	7.79e-08	-9.88395	0.000588443	0	-9.94644	0.00119457	20.6561	0	0.154456	0.000567375	0	-9.99316	0.00119364	-10.371	0.00583147	0	-19.893	0.024693	0	-38.3917	0.890061	0	-0.711847	0.0057965	0	-0.00669418
2841_ETH2-1	ETH2-1	2.02102e+07	2021-02-21 20:18:00	2021_02_21_bellows	2841	Carb	ETH2	ETH carbonate standard	Bel	3800	174.9	21.7267	3.5e-12	0.001	0	-0.63	0	FALSE	C:\Nu Stable\Analyses\CLUMPED-SEQUENCES\Clumped NuCarb + auto refill - short.seq	4	20	20	7.96e-08	7.96e-08	-9.9802	0.000571939	0	-10.1562	0.000862838	20.4398	0	0.0562551	0.000547923	0	-10.2029	0.000862234	-10.6567	0.00701231	0	-20.4078	0.0241517	0	-45.289	0.886645	1	-0.690992	0.0070448	0	-0.108262
2868_ETH2-2	ETH2-2	2.02102e+07	2021-02-23 23:29:00	2021_02_21_bellows	2868	Carb	ETH2	ETH carbonate standard	Bel	3500	153.99	22.7287	3.27e-12	0.001	0	-0.9	0	FALSE	C:\Nu Stable\Analyses\CLUMPED-SEQUENCES\Clumped NuCarb.seq	4	20	20	7.27e-08	7.32e-08	-10.149	0.000545734	0	-10.7262	0.000935974	19.8522	0	-0.123083	0.000527587	0	-10.7727	0.000935405	-11.3754	0.00713737	0	-21.3881	0.0255189	0	-29.1638	1.10647	0	-0.666582	0.00730274	0	0.0421172
2885_ETH2-3	ETH2-3	2.02102e+07	2021-02-25 07:09:00	2021_02_21_bellows	2885	Carb	ETH2	ETH carbonate standard	Bel	3700	165.95	22.2959	3.4e-12	0.001	0	-0.92	0	FALSE	C:\Nu Stable\Analyses\CLUMPED-SEQUENCES\Clumped NuCarb.seq	4	20	20	7.97e-08	7.97e-08	-10.1388	0.000583906	0	-10.6514	0.000785037	19.9294	0	-0.110832	0.000553492	0	-10.6979	0.000784302	-11.2982	0.00601515	0	-21.3033	0.0214012	0	-34.2181	0.942822	0	-0.67549	0.00610183	0	-0.0224383
2894_ETH2-4	ETH2-4	2.02102e+07	2021-02-26 02:39:00	2021_02_21_bellows	2894	Carb	ETH2	ETH carbonate standard	Bel	3300	152.22	21.6791	3.44e-12	0.001	0	-0.82	0	FALSE	C:\Nu Stable\Analyses\CLUMPED-SEQUENCES\Clumped NuCarb.seq	4	20	20	7.12e-08	7.14e-08	-10.1362	0.000494992	0	-10.7399	0.000954427	19.8381	0	-0.111467	0.000475285	0	-10.7863	0.000953651	-11.3679	0.00684381	0	-21.4045	0.0208851	0	-30.2537	1.22007	1	-0.657508	0.00690675	0	0.0528958
2913_ETH2-1	ETH2-1	2.02102e+07	2021-02-28 21:07:00	2021_02_28_bellows	2913	Carb	ETH2	ETH carbonate standard	Bel	4000	198.61	20.14	3.87e-12	0.0028644	0	-0.72	0	FALSE	C:\Nu Stable\Analyses\CLUMPED-SEQUENCES\Clumped NuCarb + auto refill - short.seq	4	20	20	7.97e-08	7.96e-08	-10.0887	0.000481847	0	-10.3992	0.000757972	20.1893	0	-0.0546365	0.000458488	0	-10.4459	0.000757298	-11.0492	0.00588773	0	-20.8594	0.0209318	0	-50.3494	0.889564	0	-0.731941	0.00588717	0	-0.078393
2929_ETH2-2	ETH2-2	2.02103e+07	2021-03-02 02:14:00	2021_02_28_bellows	2929	Carb	ETH2	ETH carbonate standard	Bel	3500	171.36	20.4248	3.69e-12	0.001	0	-1.11	0	FALSE	C:\Nu Stable\Analyses\CLUMPED-SEQUENCES\Clumped NuCarb.seq	4	20	20	7.97e-08	7.97e-08	-10.0229	0.000476803	0	-10.2868	0.000870633	20.3052	0	0.0113803	0.000460836	0	-10.3335	0.000870052	-10.7883	0.0088222	2	-20.5554	0.0247817	1	-29.0708	1.44978	1	-0.650967	0.0086603	3	0.00463597
2945_2021_03_03_bellows 3	ETH2-1	2.02103e+07	2021-03-03 21:15:00	2021_03_03_bellows	2945	NA	ETH2	ETH carbonate standard	Bel	3800	154.27	24.6321	2.92e-12	0.001	0	-1.01	0	0	NA	4	20	20	6.92e-08	6.95e-08	-9.90131	0.000584035	0	-9.93477	0.000922674	20.6681	0	0.13849	0.000552854	0	-9.98154	0.000921745	-10.4115	0.00710425	0	-19.9913	0.0211517	0	-42.8027	1.00091	0	-0.747814	0.00723015	0	-0.130473
2949_ETH2-1	ETH2-1	2.02103e+07	2021-03-09 20:30:00	2021_03_09_bellows	2949	Carb	ETH2	ETH carbonate standard	Bel	3400	173.58	19.5875	3.74e-12	0.001	0	-0.22	0	TRUE	C:\Nu Stable\Analyses\CLUMPED-SEQUENCES\Clumped NuCarb.seq	4	20	20	7.97e-08	7.97e-08	-9.90559	0.000420264	0	-9.98152	0.00123911	20.6199	0	0.132806	0.000400819	0	-10.0282	0.00123786	-10.4166	0.00633441	0	-20.0214	0.0232058	0	-35.6105	0.789698	0	-0.70076	0.00624273	0	-0.0667791
2959_ETH2-2	ETH2-2	2.02103e+07	2021-03-10 15:32:00	2021_03_09_bellows	2959	Carb	ETH2	ETH carbonate standard	Bel	3800	183.17	20.7458	3.59e-12	0.001	0	-0.46	0	TRUE	C:\Nu Stable\Analyses\CLUMPED-SEQUENCES\Clumped NuCarb.seq	4	20	20	7.96e-08	7.95e-08	-9.89948	0.000567835	0	-9.96567	0.00177176	20.6363	0	0.13912	0.000535633	0	-10.0124	0.00176984	-10.4188	0.00646533	0	-20.0707	0.0247143	0	-42.526	0.954467	0	-0.727722	0.0060405	1	-0.149146
2967_ETH2-3	ETH2-3	2.02103e+07	2021-03-11 05:41:00	2021_03_09_bellows	2967	Carb	ETH2	ETH carbonate standard	Bel	3600	181.79	19.8031	3.72e-12	0.001	0	-0.23	0	TRUE	C:\Nu Stable\Analyses\CLUMPED-SEQUENCES\Clumped NuCarb.seq	4	20	20	7.97e-08	7.96e-08	-9.89085	0.000444682	0	-9.95741	0.00111183	20.6448	0	0.147557	0.000425979	0	-10.0041	0.00111078	-10.3855	0.00597673	0	-19.9692	0.0265227	0	-39.8296	0.804061	0	-0.708495	0.00586717	0	-0.0622584
2982_ETH2-4	ETH2-4	2.02103e+07	2021-03-12 12:22:00	2021_03_09_bellows	2982	Carb	ETH2	ETH carbonate standard	Bel	3400	172.06	19.7605	3.71e-12	0.001	0	-0.36	0	TRUE	C:\Nu Stable\Analyses\CLUMPED-SEQUENCES\Clumped NuCarb.seq	4	20	20	7.97e-08	7.97e-08	-9.89774	0.000520483	0	-9.94995	0.00164036	20.6525	0	0.14132	0.000499225	0	-9.99669	0.00163874	-10.3952	0.00551024	0	-19.9963	0.0216114	0	-41.3054	0.802353	0	-0.719225	0.00538765	0	-0.104929
2998_ETH2-5	ETH2-5	2.02103e+07	2021-03-13 18:40:00	2021_03_09_bellows	2998	Carb	ETH2	ETH carbonate standard	Bel	3700	187.65	19.7176	3.8e-12	0.001	0	0.07	0	TRUE	C:\Nu Stable\Analyses\CLUMPED-SEQUENCES\Clumped NuCarb.seq	4	20	20	7.95e-08	7.95e-08	-9.90035	0.000507154	0	-9.96155	0.000739159	20.6405	0	0.13845	0.00048054	0	-10.0083	0.000738443	-10.4062	0.00667769	0	-20.0274	0.0238807	0	-41.4825	0.959216	0	-0.715893	0.00697595	0	-0.11326
3017_ETH2-1	ETH2-1	2.02103e+07	2021-03-15 11:32:00	2021_03_14_bellows	3017	Carb	ETH2	ETH carbonate standard	Bel	3800	194.64	19.5232	3.86e-12	0.001	0	-0.22	0	FALSE	C:\Nu Stable\Analyses\CLUMPED-SEQUENCES\Clumped NuCarb.seq	4	20	20	7.96e-08	7.96e-08	-9.93649	0.0005209	0	-10.0308	0.000796898	20.5692	0	0.101918	0.000495257	0	-10.0775	0.000796183	-10.4989	0.00621474	0	-20.1869	0.0223232	0	-44.5264	0.953917	0	-0.703114	0.00633773	0	-0.136154
3036_ETH2-2	ETH2-2	20210317	2021-03-17 00:46:00	2021_03_14_bellows	3036	Carb	ETH2	ETH carbonate standard	Bel	3400	174.93	19.4363	3.8e-12	0.001	0	-0.19	0	FALSE	C:\Nu Stable\Analyses\CLUMPED-SEQUENCES\Clumped NuCarb + auto refill - short - 25nA.seq	4	20	20	7.97e-08	7.97e-08	-9.86112	0.000452262	0	-9.88705	0.0007689	20.7173	0	0.178081	0.00043773	0	-9.93378	0.000768458	-10.3081	0.00576034	0	-19.855	0.0228531	0	-47.1785	1.03939	0	-0.731609	0.0059731	0	-0.087854
3052_ETH2-3	ETH2-3	2.02103e+07	2021-03-18 05:07:00	2021_03_14_bellows	3052	Carb	ETH2	ETH carbonate standard	Bel	3400	175.41	19.3832	3.8e-12	0.001	0	-0.07	0	FALSE	C:\Nu Stable\Analyses\CLUMPED-SEQUENCES\Clumped NuCarb.seq	4	20	20	7.97e-08	7.97e-08	-9.87601	0.000500592	0	-9.9536	0.000727368	20.6487	0	0.161697	0.000476439	0	-10.0003	0.000726751	-10.3585	0.00691907	0	-20.0051	0.0219575	0	-39.4389	0.742042	1	-0.699591	0.00711615	0	-0.106686
3061_ETH2-4	ETH2-4	2.02103e+07	2021-03-18 21:45:00	2021_03_14_bellows	3061	Carb	ETH2	ETH carbonate standard	Bel	3600	178.47	20.1715	3.66e-12	0.001	0	-0.12	0	FALSE	C:\Nu Stable\Analyses\CLUMPED-SEQUENCES\Clumped NuCarb.seq	4	20	20	7.97e-08	7.96e-08	-9.90738	0.000409224	0	-9.99859	0.000801925	20.6024	0	0.130511	0.000386875	0	-10.0453	0.000801081	-10.4317	0.00593444	0	-20.0711	0.0197878	0	-39.0643	0.914316	1	-0.696711	0.00605976	0	-0.0830485
3077_ETH2-1	ETH2-1	2.02103e+07	2021-03-21 16:51:00	2021_03_21_bellows	3077	Carb	ETH2	ETH carbonate standard	Bel	3800	190.98	19.8974	3.75e-12	0.001	0	-0.13	0	FALSE	C:\Nu Stable\Analyses\CLUMPED-SEQUENCES\Clumped NuCarb.seq	4	20	20	7.96e-08	7.95e-08	-9.88699	0.000426317	0	-9.90205	0.000838629	20.7019	0	0.153148	0.000411856	0	-9.94882	0.000838016	-10.3376	0.00560522	0	-19.9	0.0253598	0	-40.353	0.760123	0	-0.720798	0.00573715	0	-0.103363
3096_ETH2-2	ETH2-2	2.02103e+07	2021-03-23 07:17:00	2021_03_21_bellows	3096	Carb	ETH2	ETH carbonate standard	Bel	4000	201.45	19.856	3.82e-12	0.001	0	0.33	0	FALSE	C:\Nu Stable\Analyses\CLUMPED-SEQUENCES\Clumped NuCarb.seq	4	20	20	7.96e-08	7.96e-08	-9.86553	0.000487017	0	-9.884	0.000834587	20.7205	0	0.17403	0.000465211	0	-9.93074	0.000833884	-10.299	0.00605473	0	-19.8509	0.0257687	0	-41.4534	0.905559	0	-0.721297	0.00616666	0	-0.0898448
ETH3 - CARBONATE STANDARD
2675_ETH3-1	ETH3-1	2.02102e+07	2021-02-03 06:22:00	2021_02_02_bellows	2675	Carb	ETH3	ETH carbonate standard	Bel	3400	157.2	21.6285	3.4e-12	0.001	0	-1.73	0	FALSE	C:\Nu Stable\Analyses\CLUMPED-SEQUENCES\Clumped NuCarb.seq	4	20	20	7.31e-08	7.34e-08	1.8677	0.000503933	0	6.76553	0.000753166	37.8847	0	11.8278	0.000478992	0	6.72632	0.000752505	18.6217	0.0070763	0	13.4717	0.0244085	0	7.22339	0.715691	0	-0.27371	0.00700713	0	-0.0257069
2682_ETH3-2	ETH3-2	2.02102e+07	2021-02-03 19:17:00	2021_02_02_bellows	2682	Carb	ETH3	ETH carbonate standard	Bel	3500	154.08	22.7155	3.25e-12	0.001	0	-1.62	0	FALSE	C:\Nu Stable\Analyses\CLUMPED-SEQUENCES\Clumped NuCarb + auto refill - short.seq	4	20	20	7.15e-08	7.18e-08	1.85069	0.000493611	0	6.69745	0.000933129	37.8145	0	11.8094	0.000470957	0	6.65828	0.0009323	18.5634	0.00640071	0	13.4389	0.0216878	0	6.06264	0.831329	0	-0.245767	0.00654868	0	0.0771033
2699_ETH3-4	ETH3-4	2.02102e+07	2021-02-05 01:36:00	2021_02_02_bellows	2699	Carb	ETH3	ETH carbonate standard	Bel	3500	157.07	22.2831	3.31e-12	0.001	0	-17.85	BalPct	FALSE	C:\Nu Stable\Analyses\CLUMPED-SEQUENCES\Clumped NuCarb.seq	4	20	20	7.23e-08	1.06e-07	2.06204	0.00169362	0	7.27973	0.00318872	38.4147	0	12.0291	0.00170264	0	7.24039	0.00318878	19.3386	0.00837825	0	14.931	0.0256587	0	29.1261	0.791238	0	-0.277288	0.00663464	0	0.392186
2720_ETH3-5	ETH3-5	2.02102e+07	2021-02-06 15:30:00	2021_02_02_bellows	2720	Carb	ETH3	ETH carbonate standard	Bel	3600	163.21	22.0575	3.39e-12	0.001	0	-6.62	0	FALSE	C:\Nu Stable\Analyses\CLUMPED-SEQUENCES\Clumped NuCarb.seq	4	20	20	7.69e-08	9.84e-08	1.96373	0.00117617	0	6.98828	0.00197783	38.1143	0	11.9262	0.00116183	0	6.94904	0.00197763	18.9661	0.00803232	0	14.3022	0.0217017	0	25.1794	0.890221	1	-0.2535	0.00735366	0	0.351058
2730_ETH3-1	ETH3-1	2.02102e+07	2021-02-08 19:46:00	2020_02_08_bellows	2730	Carb	ETH3	ETH carbonate standard	Bel	3500	95.03	36.8305	1.87e-12	0.001	0	-21.16	BalPct	FALSE	C:\Nu Stable\Analyses\CLUMPED-SEQUENCES\Clumped NuCarb + auto refill - short.seq	4	20	20	3.81e-08	5.62e-08	1.98143	0.000736348	0	7.13344	0.00185915	38.2639	0	11.948	0.000726562	0	7.09409	0.00185794	19.1793	0.0087165	4	14.5539	0.0338956	0	21.0591	1.45381	0	-0.213365	0.00847912	2	0.3111
2748_ETH3-2	ETH3-2	2.02102e+07	2021-02-10 07:23:00	2020_02_08_bellows	2748	Carb	ETH3	ETH carbonate standard	Bel	3400	154.08	22.0665	3.38e-12	0.001	0	-1.22	0	FALSE	C:\Nu Stable\Analyses\CLUMPED-SEQUENCES\Clumped NuCarb.seq	4	20	20	7.25e-08	7.42e-08	1.84566	0.000689599	0	6.85989	0.00146415	37.9819	0	11.8103	0.000679937	0	6.82054	0.00146343	18.7323	0.00584964	0	13.7078	0.0214098	0	13.0047	0.81038	0	-0.239264	0.00552803	0	0.0200227
2765_ETH3-3	ETH3-3	2.02102e+07	2021-02-11 16:32:00	2020_02_08_bellows	2765	Carb	ETH3	ETH carbonate standard	Bel	3600	148.1	24.3079	3.03e-12	0.001	0	-1.07	0	FALSE	C:\Nu Stable\Analyses\CLUMPED-SEQUENCES\Clumped NuCarb + auto refill - short.seq	4	20	20	6.82e-08	6.84e-08	1.90659	0.00047534	0	7.00204	0.000713937	38.1285	0	11.8728	0.000455192	0	6.96267	0.000713446	18.9185	0.00579413	0	13.9377	0.0232773	0	9.9283	0.82697	0	-0.258982	0.00585449	0	-0.0354889
2782_ETH3-4	ETH3-4	2.02102e+07	2021-02-12 22:29:00	2020_02_08_bellows	2782	Carb	ETH3	ETH carbonate standard	Bel	3900	172	22.6744	3.35e-12	0.001	0	-1.06	0	FALSE	C:\Nu Stable\Analyses\CLUMPED-SEQUENCES\Clumped NuCarb.seq	4	20	20	7.97e-08	7.96e-08	1.87329	0.000436334	0	6.97743	0.000715789	38.1031	0	11.8405	0.000414642	0	6.93801	0.000715134	18.8552	0.00629164	1	13.9037	0.0222014	0	13.3721	0.876367	1	-0.264246	0.00644167	1	-0.0200707
2798_ETH3-1	ETH3-1	2.02102e+07	2021-02-14 23:19:00	2021_02_14_bellows	2798	Carb	ETH3	ETH carbonate standard	Bel	4000	194.43	20.573	3.79e-12	0.001	0	-1.11	0	FALSE	C:\Nu Stable\Analyses\CLUMPED-SEQUENCES\Clumped NuCarb.seq	4	20	20	7.96e-08	7.96e-08	1.86384	0.000548026	0	6.93535	0.00143126	38.0597	0	11.8301	0.000522603	0	6.89595	0.00142986	18.8213	0.00572811	0	13.8488	0.0284281	0	20.3012	0.911333	0	-0.24577	0.00551447	0	0.00933946
2814_ETH3-2	ETH3-2	2.02102e+07	2021-02-16 06:09:00	2021_02_14_bellows	2814	Carb	ETH3	ETH carbonate standard	Bel	3700	181.95	20.3353	3.77e-12	0.001	0	-1.17	0	FALSE	C:\Nu Stable\Analyses\CLUMPED-SEQUENCES\Clumped NuCarb.seq	4	20	20	7.95e-08	7.95e-08	1.94956	0.000440342	0	7.15927	0.00120511	38.2906	0	11.9188	0.000417184	0	7.11982	0.00120386	19.1175	0.00659493	0	14.2186	0.0231128	0	14.4732	0.94377	0	-0.264121	0.00650845	0	-0.0706209
2823_ETH3-1	ETH3-1	2.02102e+07	2021-02-18 16:15:00	2021_02_18_bellows	2823	Carb	ETH3	ETH carbonate standard	Bel	3900	136.02	28.6723	2.54e-12	0.001	0	-0.61	0	FALSE	C:\Nu Stable\Analyses\CLUMPED-SEQUENCES\Clumped NuCarb.seq	4	20	20	6.09e-08	6.12e-08	1.96241	0.000508531	0	7.18219	0.00099281	38.3142	0	11.9317	0.000487614	0	7.14275	0.000991993	19.1627	0.00847754	0	14.2494	0.0248727	0	8.36908	1.08095	1	-0.255262	0.0085756	0	-0.0858021
2851_ETH3-1	ETH3-1	2.02102e+07	2021-02-22 15:31:00	2021_02_21_bellows	2851	Carb	ETH3	ETH carbonate standard	Bel	3400	156.77	21.6878	3.43e-12	0.001	0	-0.87	0	FALSE	C:\Nu Stable\Analyses\CLUMPED-SEQUENCES\Clumped NuCarb + auto refill - short.seq	4	20	20	7.38e-08	7.41e-08	1.85293	0.000409213	0	6.93236	0.00118851	38.0566	0	11.8197	0.000387899	0	6.89295	0.00118728	18.7912	0.00642454	2	13.824	0.0215343	0	13.0952	1.09346	1	-0.262169	0.00633149	2	-0.00915031
2860_ETH3-2	ETH3-2	2.02102e+07	2021-02-23 08:12:00	2021_02_21_bellows	2860	Carb	ETH3	ETH carbonate standard	Bel	3300	148.56	22.2132	3.31e-12	0.001	0	-0.92	0	FALSE	C:\Nu Stable\Analyses\CLUMPED-SEQUENCES\Clumped NuCarb.seq	4	20	20	6.84e-08	6.87e-08	1.71501	0.000532893	0	6.52461	0.00061179	37.6363	0	11.6753	0.000505783	0	6.48533	0.000611296	18.253	0.00624543	2	13.0454	0.0237833	0	12.2884	1.166	2	-0.245079	0.00619561	2	0.0323574
2876_ETH3-3	ETH3-3	2.02102e+07	2021-02-24 14:26:00	2021_02_21_bellows	2876	Carb	ETH3	ETH carbonate standard	Bel	3900	173.28	22.5069	3.36e-12	0.0042936	0	-0.85	0	FALSE	C:\Nu Stable\Analyses\CLUMPED-SEQUENCES\Clumped NuCarb + auto refill - short.seq	4	20	20	7.97e-08	7.96e-08	1.75108	0.00047667	0	6.45215	0.00125927	37.5616	0	11.7068	0.000461405	0	6.41302	0.0012582	18.2158	0.00671942	1	12.9023	0.0239059	0	19.8385	1.04315	1	-0.243036	0.00668943	1	0.0348323
2902_ETH3-4	ETH3-4	2.02102e+07	2021-02-26 16:52:00	2021_02_21_bellows	2902	Carb	ETH3	ETH carbonate standard	Bel	3800	158.72	23.9415	3.1e-12	0.01104	0	-1.16	PumpOver	FALSE	C:\Nu Stable\Analyses\CLUMPED-SEQUENCES\Clumped NuCarb.seq	4	20	20	7.51e-08	7.53e-08	1.76348	0.00054079	0	6.34316	0.0009741	37.4492	0	11.7147	0.000519484	0	6.30417	0.000973372	18.142	0.0068333	0	12.8163	0.0258707	0	30.1715	1.01535	0	-0.217128	0.00684105	0	0.166211
2920_ETH3-1	ETH3-1	2.02103e+07	2021-03-01 10:15:00	2021_02_28_bellows	2920	Carb	ETH3	ETH carbonate standard	Bel	3700	179.47	20.6163	3.71e-12	0.001	0	-0.98	0	FALSE	C:\Nu Stable\Analyses\CLUMPED-SEQUENCES\Clumped NuCarb.seq	4	20	20	7.95e-08	7.95e-08	1.88859	0.000471894	0	7.04536	0.000802563	38.1731	0	11.8573	0.000455271	0	7.00591	0.000802066	18.9446	0.00621326	0	14.0625	0.0237931	0	16.0714	0.941288	0	-0.259808	0.00599035	0	0.00169992
2930_ETH3-1	ETH3-1	2.02103e+07	2021-03-02 04:00:00	2021_02_28_bellows	2930	Carb	ETH3	ETH carbonate standard	Bel	3400	151.61	22.426	3.31e-12	0.001	0	-1.22	0	FALSE	C:\Nu Stable\Analyses\CLUMPED-SEQUENCES\Clumped NuCarb.seq	4	20	20	7.04e-08	7.48e-08	1.78888	0.00149044	0	6.75263	0.00291805	37.8713	0	11.753	0.00150154	0	6.71326	0.00291797	18.5511	0.00726649	3	13.4532	0.0220765	0	15.4013	0.972042	0	-0.246569	0.00666237	0	-0.018075
2950_ETH3-1	ETH3-1	2.02103e+07	2021-03-09 22:58:00	2021_03_09_bellows	2950	Carb	ETH3	ETH carbonate standard	Bel	3400	163.3	20.8206	3.5e-12	0.001	0	-0.43	0	TRUE	C:\Nu Stable\Analyses\CLUMPED-SEQUENCES\Clumped NuCarb.seq	4	20	20	7.51e-08	7.53e-08	1.90729	0.000498443	0	7.05893	0.000831661	38.1871	0	11.8754	0.000473474	0	7.0195	0.000830889	18.95	0.00702681	0	13.9575	0.0247316	0	1.00147	0.915372	0	-0.286244	0.00705389	0	-0.128819
2963_ETH3-2	ETH3-2	2.02103e+07	2021-03-10 22:34:00	2021_03_09_bellows	2963	Carb	ETH3	ETH carbonate standard	Bel	3900	192.02	20.3104	3.7e-12	0.001	0	-0.33	0	TRUE	C:\Nu Stable\Analyses\CLUMPED-SEQUENCES\Clumped NuCarb + auto refill - short - 25nA.seq	4	20	20	7.96e-08	7.95e-08	1.93651	0.000559291	0	7.11916	0.001519	38.2492	0	11.9051	0.000541805	0	7.07973	0.00151769	19.0317	0.00677205	0	14.145	0.0222209	0	-0.757976	0.958599	0	-0.295191	0.00646137	0	-0.063552
2968_ETH3-3	ETH3-3	2.02103e+07	2021-03-11 07:27:00	2021_03_09_bellows	2968	Carb	ETH3	ETH carbonate standard	Bel	3500	165.44	21.1557	3.45e-12	0.001	0	-0.08	0	TRUE	C:\Nu Stable\Analyses\CLUMPED-SEQUENCES\Clumped NuCarb.seq	4	20	20	7.65e-08	7.68e-08	1.93551	0.000498928	0	7.07784	0.000868754	38.2066	0	11.9027	0.000471782	0	7.03845	0.000867863	19.0019	0.00772112	0	14.0409	0.0242048	0	2.30646	0.82211	0	-0.281692	0.00766476	0	-0.0842959
2990_ETH3-4	ETH3-4	2.02103e+07	2021-03-13 03:49:00	2021_03_09_bellows	2990	Carb	ETH3	ETH carbonate standard	Bel	3900	195.74	19.9244	3.79e-12	0.001	0	0.2	0	TRUE	C:\Nu Stable\Analyses\CLUMPED-SEQUENCES\Clumped NuCarb + auto refill - short - 25nA.seq	4	20	20	7.96e-08	7.96e-08	1.93785	0.000578175	0	7.12023	0.00231952	38.2503	0	11.9064	0.00055346	0	7.0808	0.00231717	19.0243	0.00640418	0	14.1864	0.0234948	0	-1.9153	0.868674	1	-0.304743	0.00575337	0	-0.0248608
3008_ETH3-1	ETH3-1	2.02103e+07	2021-03-14 19:22:00	2021_03_14_bellows	3008	Carb	ETH3	ETH carbonate standard	Bel	3800	186.34	20.3928	3.66e-12	0.001	0	0.2	0	FALSE	C:\Nu Stable\Analyses\CLUMPED-SEQUENCES\Clumped NuCarb.seq	4	20	20	7.95e-08	7.95e-08	1.9223	0.000520334	0	7.07928	0.000782245	38.2081	0	11.8903	0.000497532	0	7.03986	0.000781677	18.975	0.00622225	0	14.08	0.0254237	0	2.82751	0.934759	0	-0.296731	0.00612176	0	-0.0484311
3026_ETH3-2	ETH3-2	2.02103e+07	2021-03-16 06:15:00	2021_03_14_bellows	3026	Carb	ETH3	ETH carbonate standard	Bel	3700	185.27	19.9709	3.74e-12	0.001	0	-0.22	0	FALSE	C:\Nu Stable\Analyses\CLUMPED-SEQUENCES\Clumped NuCarb.seq	4	20	20	7.96e-08	7.95e-08	1.90255	0.000504867	0	7.04283	0.000792538	38.1705	0	11.8704	0.000485427	0	7.00341	0.000792044	18.9318	0.00625226	0	13.9791	0.0233869	0	-0.0301763	1.02343	0	-0.283325	0.00618123	0	-0.0755952
3044_ETH3-3	ETH3-3	2.02103e+07	2021-03-17 14:59:00	2021_03_14_bellows	3044	Carb	ETH3	ETH carbonate standard	Bel	3900	190.86	20.4338	3.66e-12	0.001	0	-0.18	0	FALSE	C:\Nu Stable\Analyses\CLUMPED-SEQUENCES\Clumped NuCarb.seq	4	20	20	7.96e-08	7.95e-08	1.93668	0.000517637	0	7.14538	0.000781704	38.2762	0	11.9062	0.00048643	0	7.10592	0.000780791	19.0668	0.00698413	0	14.2049	0.0241545	0	3.33157	0.915069	1	-0.287379	0.00692261	0	-0.0565312
3062_ETH3-4	ETH3-4	2.02103e+07	2021-03-18 23:32:00	2021_03_14_bellows	3062	Carb	ETH3	ETH carbonate standard	Bel	3400	164.15	20.7128	3.53e-12	0.001	0	-0.22	0	FALSE	C:\Nu Stable\Analyses\CLUMPED-SEQUENCES\Clumped NuCarb.seq	4	20	20	7.55e-08	7.57e-08	1.9154	0.000438309	0	7.04989	0.000774735	38.1778	0	11.8827	0.000412108	0	7.01048	0.000773858	18.9491	0.00641387	1	14.0483	0.0231743	0	3.49313	0.900187	0	-0.285871	0.00625402	1	-0.0213648
3087_ETH3-1	ETH3-1	2.02103e+07	2021-03-22 13:18:00	2021_03_21_bellows	3087	Carb	ETH3	ETH carbonate standard	Bel	3900	187.62	20.7867	3.6e-12	0.001	0	-0.16	0	FALSE	C:\Nu Stable\Analyses\CLUMPED-SEQUENCES\Clumped NuCarb.seq	4	20	20	7.95e-08	7.95e-08	1.94111	0.000511202	2	7.14096	0.00111408	38.2717	0	11.9102	0.000486308	2	7.10151	0.00111743	19.0617	0.00606104	0	14.1721	0.0224777	0	1.14397	0.861488	0	-0.294799	0.00614665	2	-0.0801032
3097_ETH3-2	ETH3-2	2.02103e+07	2021-03-23 09:03:00	2021_03_21_bellows	3097	Carb	ETH3	ETH carbonate standard	Bel	3700	175.29	21.1079	3.51e-12	0.001	0	-0.23	0	FALSE	C:\Nu Stable\Analyses\CLUMPED-SEQUENCES\Clumped NuCarb + auto refill - short - 25nA.seq	4	20	20	7.97e-08	7.97e-08	1.96187	0.000494419	0	7.14361	0.000932213	38.2744	0	11.9299	0.000479322	0	7.1042	0.000931634	19.0923	0.00658519	0	14.2217	0.0249946	0	0.612599	1.11391	1	-0.284881	0.006552	0	-0.0365278
ETH4 - CARBONATE STANDARD
2670_ETH4-1	ETH4-1	2.02102e+07	2021-02-02 19:25:00	2021_02_02_bellows	2670	Carb	ETH4	ETH carbonate standard	Bel	3700	168.7	21.9324	3.38e-12	0.001	0	-0.25	0	FALSE	C:\Nu Stable\Analyses\CLUMPED-SEQUENCES\Clumped NuCarb.seq	4	20	20	7.97e-08	7.97e-08	-9.95135	0.000472182	0	-10.0332	0.00095059	20.5667	0	0.0878124	0.000457057	0	-10.0799	0.000949907	-10.2827	0.00608886	0	-20.0627	0.0228995	0	-32.5737	0.650394	0	-0.467858	0.00624319	0	-0.0045127
2690_ETH4-3	ETH4-3	2.02102e+07	2021-02-04 09:34:00	2021_02_02_bellows	2690	Carb	ETH4	ETH carbonate standard	Bel	3700	179.05	20.6646	3.67e-12	0.001	0	-1.77	0	FALSE	C:\Nu Stable\Analyses\CLUMPED-SEQUENCES\Clumped NuCarb.seq	4	20	20	7.95e-08	7.95e-08	-10.001	0.000584986	0	-10.2358	0.000893916	20.3578	0	0.0338153	0.000564534	0	-10.2825	0.000893444	-10.5365	0.00725505	0	-20.4919	0.0252879	0	-28.5789	0.822865	0	-0.467446	0.00739729	0	-0.0333725
2706_ETH4-4	ETH4-4	2.02102e+07	2021-02-05 14:10:00	2021_02_02_bellows	2706	Carb	ETH4	ETH carbonate standard	Bel	3400	125.55	27.0808	2.63e-12	0.001	0	-1.16	0	FALSE	C:\Nu Stable\Analyses\CLUMPED-SEQUENCES\Clumped NuCarb.seq	4	20	20	5.44e-08	6.1e-08	-9.95526	0.00130724	0	-10.0494	0.00267449	20.55	0	0.0835519	0.00131821	0	-10.0962	0.00267414	-10.2865	0.00840479	1	-20.0615	0.0265881	0	-29.4984	0.999272	0	-0.448138	0.00801568	0	0.0294551
2713_ETH4-5	ETH4-5	2.02102e+07	2021-02-06 02:49:00	2021_02_02_bellows	2713	Carb	ETH4	ETH carbonate standard	Bel	3900	186.58	20.9026	3.64e-12	0.001	0	-4.36	0	FALSE	C:\Nu Stable\Analyses\CLUMPED-SEQUENCES\Clumped NuCarb.seq	4	20	20	7.95e-08	1.08e-07	-9.85384	0.00160056	1	-10.2179	0.00302391	20.3763	1	0.173313	0.00160943	1	-10.2642	0.00302386	-10.3727	0.00717359	1	-20.062	0.0239398	0	-13.7843	0.749896	0	-0.463572	0.00582533	0	0.375118
2739_ETH4-1	ETH4-1	2.02102e+07	2021-02-09 13:56:00	2020_02_08_bellows	2739	Carb	ETH4	ETH carbonate standard	Bel	3500	166.87	20.9744	3.6e-12	0.001	0	-0.68	0	FALSE	C:\Nu Stable\Analyses\CLUMPED-SEQUENCES\Clumped NuCarb.seq	4	20	20	7.97e-08	7.97e-08	-10.0456	0.000428917	0	-10.3112	0.00120688	20.2801	0	-0.0109071	0.000412792	0	-10.3578	0.00120575	-10.628	0.00569696	1	-20.5791	0.0224942	0	-32.0004	0.893401	1	-0.439022	0.00596032	1	0.0298493
2749_ETH4-2	ETH4-2	2.02102e+07	2021-02-10 09:52:00	2020_02_08_bellows	2749	Carb	ETH4	ETH carbonate standard	Bel	3600	171.11	21.0391	3.62e-12	0.001	0	-1.17	0	FALSE	C:\Nu Stable\Analyses\CLUMPED-SEQUENCES\Clumped NuCarb.seq	4	20	20	7.97e-08	7.97e-08	-10.0261	0.000529677	0	-10.2141	0.0011002	20.3802	0	0.0108789	0.000515674	0	-10.2609	0.00109947	-10.5332	0.0067301	0	-20.3732	0.0229986	0	-35.3926	0.818062	0	-0.461915	0.00681105	0	0.0441503
2775_ETH4-3	ETH4-3	2.02102e+07	2021-02-12 10:18:00	2020_02_08_bellows	2775	Carb	ETH4	ETH carbonate standard	Bel	3300	153.56	21.49	3.45e-12	0.0027385	0	-0.99	0	FALSE	C:\Nu Stable\Analyses\CLUMPED-SEQUENCES\Clumped NuCarb + auto refill - short.seq	4	20	20	7.18e-08	7.21e-08	-10.132	0.00046852	0	-10.5511	0.000954236	20.0328	0	-0.100852	0.000444293	0	-10.5977	0.000953269	-10.9582	0.0061056	0	-20.9842	0.0194576	0	-32.3738	0.860414	0	-0.44158	0.00619409	0	0.101049
2791_ETH4-4	ETH4-4	2.02102e+07	2021-02-13 14:25:00	2020_02_08_bellows	2791	Carb	ETH4	ETH carbonate standard	Bel	3600	162.63	22.1361	3.39e-12	0.0028007	0	-0.96	0	FALSE	C:\Nu Stable\Analyses\CLUMPED-SEQUENCES\Clumped NuCarb.seq	4	20	20	7.88e-08	7.89e-08	-10.1105	0.00046835	0	-10.5103	0.000815829	20.0748	0	-0.0791659	0.00044228	0	-10.5569	0.000814959	-10.8799	0.0061473	0	-20.9578	0.0204806	0	-30.0371	0.964058	0	-0.425334	0.00618182	0	0.0456244
2806_ETH4-1	ETH4-1	2.02102e+07	2021-02-15 15:37:00	2021_02_14_bellows	2806	Carb	ETH4	ETH carbonate standard	Bel	3800	185.06	20.5339	3.76e-12	0.001	0	-0.74	0	FALSE	C:\Nu Stable\Analyses\CLUMPED-SEQUENCES\Clumped NuCarb + auto refill - short.seq	4	20	20	7.96e-08	7.95e-08	-10.0734	0.000459972	0	-10.3025	0.000748695	20.289	0	-0.0368332	0.000436915	0	-10.3492	0.000747992	-10.6536	0.0068536	0	-20.5878	0.0258623	0	-28.9152	0.79434	1	-0.446595	0.00693587	0	0.00367374
2831_ETH4-1	ETH4-1	2.02102e+07	2021-02-19 08:37:00	2021_02_18_bellows	2831	Carb	ETH4	ETH carbonate standard	Bel	3800	175.99	21.5921	3.52e-12	0.001	0	-0.75	0	FALSE	C:\Nu Stable\Analyses\CLUMPED-SEQUENCES\Clumped NuCarb.seq	4	20	20	7.96e-08	7.96e-08	-10.0377	0.000482775	0	-10.4054	0.001038	20.1829	0	-0.00672657	0.00046738	0	-10.452	0.00103721	-10.6772	0.00544142	0	-20.7434	0.0226373	0	-22.1868	0.959804	0	-0.399458	0.00535941	0	0.0524028
2842_ETH4-1	ETH4-1	2.02102e+07	2021-02-21 22:07:00	2021_02_21_bellows	2842	Carb	ETH4	ETH carbonate standard	Bel	3300	155.36	21.241	3.47e-12	0.001	0	-1	0	FALSE	C:\Nu Stable\Analyses\CLUMPED-SEQUENCES\Clumped NuCarb.seq	4	20	20	7.26e-08	7.43e-08	-9.97101	0.000619977	0	-10.101	0.00156661	20.4968	0	0.066879	0.000622812	0	-10.1477	0.00156584	-10.3252	0.00656263	0	-20.1937	0.0230023	0	-31.1365	1.02332	0	-0.421883	0.00632248	0	-0.00128141
2859_ETH4-2	ETH4-2	2.02102e+07	2021-02-23 06:26:00	2021_02_21_bellows	2859	Carb	ETH4	ETH carbonate standard	Bel	3900	178.5	21.8487	3.49e-12	0.001	0	-0.86	0	FALSE	C:\Nu Stable\Analyses\CLUMPED-SEQUENCES\Clumped NuCarb.seq	4	20	20	7.95e-08	7.95e-08	-10.1917	0.000493743	0	-10.694	0.000874916	19.8855	0	-0.1622	0.000467434	0	-10.7406	0.000874022	-11.1738	0.00690887	0	-21.278	0.0198943	0	-35.076	0.999359	0	-0.454306	0.00696999	0	0.0896639
2886_ETH4-3	ETH4-3	2.02102e+07	2021-02-25 09:38:00	2021_02_21_bellows	2886	Carb	ETH4	ETH carbonate standard	Bel	3500	153.02	22.8728	3.25e-12	0.001	0	-0.91	0	FALSE	C:\Nu Stable\Analyses\CLUMPED-SEQUENCES\Clumped NuCarb + auto refill - short.seq	4	20	20	7.16e-08	7.19e-08	-10.225	0.000519823	0	-10.8915	0.000929104	19.6819	0	-0.200585	0.000495383	0	-10.9379	0.000928263	-11.3811	0.00755954	0	-21.671	0.0251655	0	-31.157	1.08286	0	-0.428255	0.00744963	0	0.0870715
2903_ETH4-4	ETH4-4	2.02102e+07	2021-02-26 18:39:00	2021_02_21_bellows	2903	Carb	ETH4	ETH carbonate standard	Bel	3700	158.33	23.3689	3.19e-12	0.0029296	0	-1.05	0	FALSE	C:\Nu Stable\Analyses\CLUMPED-SEQUENCES\Clumped NuCarb.seq	4	20	20	7.46e-08	7.49e-08	-10.2008	0.000508474	0	-10.8692	0.00101192	19.7048	0	-0.176935	0.000490833	0	-10.9157	0.00101116	-11.3072	0.00509565	0	-21.5449	0.0217684	0	-22.7895	0.918227	0	-0.400122	0.00539114	0	0.170933
2911_ETH4-1	ETH4-1	2.02102e+07	2021-02-28 16:56:00	2021_02_28_bellows	2911	Carb	ETH4	ETH carbonate standard	Bel	3300	162.72	20.2802	3.7e-12	0.001	0	-0.81	0	FALSE	C:\Nu Stable\Analyses\CLUMPED-SEQUENCES\Clumped NuCarb.seq	4	20	20	7.82e-08	7.84e-08	-10.0506	0.000478174	0	-10.2977	0.000723211	20.294	0	-0.0151093	0.000457332	0	-10.3444	0.000722673	-10.6513	0.00609429	0	-20.5742	0.0203764	0	-42.9225	0.899191	0	-0.471489	0.00612694	0	0.00771187
2940_ETH4-2	ETH4-2	2.02103e+07	2021-03-02 21:19:00	2021_02_28_bellows	2940	Carb	ETH4	ETH carbonate standard	Bel	3700	177.61	20.8322	3.67e-12	0.001	0	-0.86	0	FALSE	C:\Nu Stable\Analyses\CLUMPED-SEQUENCES\Clumped NuCarb.seq	4	20	20	7.96e-08	7.95e-08	-10.0897	0.000490217	0	-10.3776	0.000863783	20.2116	0	-0.0548138	0.000469925	0	-10.4243	0.0008631	-10.7555	0.00638592	0	-20.7497	0.024045	0	-33.3375	0.853725	0	-0.456518	0.00647013	0	-0.0100153
2953_ETH4-1	ETH4-1	2.02103e+07	2021-03-10 04:17:00	2021_03_09_bellows	2953	Carb	ETH4	ETH carbonate standard	Bel	3600	179.81	20.0211	3.7e-12	0.001	0	-0.39	0	TRUE	C:\Nu Stable\Analyses\CLUMPED-SEQUENCES\Clumped NuCarb.seq	4	20	20	7.97e-08	7.96e-08	-9.98102	0.000521844	0	-10.1526	0.000832451	20.4436	0	0.0556192	0.000496696	0	-10.1993	0.000831712	-10.4449	0.00632366	0	-20.3453	0.0215801	0	-39.6587	0.854521	1	-0.480012	0.00621367	0	-0.0518647
2960_ETH4-2	ETH4-2	2.02103e+07	2021-03-10 17:17:00	2021_03_09_bellows	2960	Carb	ETH4	ETH carbonate standard	Bel	3800	189.39	20.0644	3.71e-12	0.001	0	-0.37	0	TRUE	C:\Nu Stable\Analyses\CLUMPED-SEQUENCES\Clumped NuCarb + auto refill - short - 25nA.seq	4	20	20	7.95e-08	7.95e-08	-9.98694	0.000541232	0	-10.1561	0.00195082	20.44	0	0.049904	0.000516713	0	-10.2028	0.00194881	-10.4731	0.00604743	0	-20.3015	0.0255717	0	-44.6358	0.834462	1	-0.499151	0.00620314	0	-9.71e-05
2976_ETH4-3	ETH4-3	20210312	2021-03-12 00:21:00	2021_03_09_bellows	2976	Carb	ETH4	ETH carbonate standard	Bel	3700	179.53	20.6094	3.61e-12	0.001	0	-0.33	0	TRUE	C:\Nu Stable\Analyses\CLUMPED-SEQUENCES\Clumped NuCarb.seq	4	20	20	7.97e-08	7.96e-08	-9.97723	0.000472624	0	-10.0971	0.000801136	20.5007	0	0.0611434	0.000452336	0	-10.1439	0.000800495	-10.397	0.00659843	0	-20.2002	0.0229698	0	-41.6683	0.82764	0	-0.492278	0.0067151	0	-0.0156375
2999_ETH4-4	ETH4-4	2.02103e+07	2021-03-13 20:24:00	2021_03_09_bellows	2999	Carb	ETH4	ETH carbonate standard	Bel	3700	194.76	18.9977	3.98e-12	0.001	0	0.3	0	TRUE	C:\Nu Stable\Analyses\CLUMPED-SEQUENCES\Clumped NuCarb + auto refill - short - 25nA.seq	4	20	20	7.96e-08	7.96e-08	-9.97841	0.000420545	0	-10.1254	0.000752038	20.4716	0	0.0590324	0.000403692	0	-10.1721	0.000751455	-10.4273	0.00647669	0	-20.255	0.0217663	0	-44.3997	0.950694	0	-0.492675	0.00663178	0	-0.0145259
3009_ETH4-1	ETH4-1	2.02103e+07	2021-03-14 21:08:00	2021_03_14_bellows	3009	Carb	ETH4	ETH carbonate standard	Bel	3800	194.31	19.5564	3.85e-12	0.001	0	-0.2	0	FALSE	C:\Nu Stable\Analyses\CLUMPED-SEQUENCES\Clumped NuCarb + auto refill - short - 25nA.seq	4	20	20	7.96e-08	7.95e-08	-9.99366	0.000518602	0	-10.1483	0.00104682	20.448	0	0.043841	0.000493314	0	-10.195	0.00104581	-10.4531	0.00611395	0	-20.3102	0.0241214	0	-45.3817	0.813897	0	-0.480359	0.00616977	0	-0.0246255
3035_ETH4-2	ETH4-2	2.02103e+07	2021-03-16 23:00:00	2021_03_14_bellows	3035	Carb	ETH4	ETH carbonate standard	Bel	3700	170.38	21.7162	3.39e-12	0.001	0	-0.24	0	FALSE	C:\Nu Stable\Analyses\CLUMPED-SEQUENCES\Clumped NuCarb.seq	4	20	20	7.94e-08	7.95e-08	-9.91469	0.000448284	0	-9.98308	0.000818753	20.6183	0	0.124157	0.000432266	0	-10.0298	0.000818173	-10.217	0.00671623	0	-19.9942	0.019619	0	-43.1061	0.955204	0	-0.488689	0.00654797	0	-0.0358815
3043_ETH4-3	ETH4-3	2.02103e+07	2021-03-17 13:13:00	2021_03_14_bellows	3043	Carb	ETH4	ETH carbonate standard	Bel	3500	176.67	19.8109	3.73e-12	0.001	0	-0.17	0	FALSE	C:\Nu Stable\Analyses\CLUMPED-SEQUENCES\Clumped NuCarb.seq	4	20	20	7.97e-08	7.97e-08	-9.93793	0.000425391	0	-10.0208	0.000729186	20.5794	0	0.10091	0.000402287	0	-10.0676	0.00072843	-10.2836	0.00593555	0	-20.0575	0.0218912	0	-41.1306	0.845644	1	-0.494489	0.00607629	0	-0.0242187
3070_ETH4-4	ETH4-4	2.02103e+07	2021-03-19 14:27:00	2021_03_14_bellows	3070	Carb	ETH4	ETH carbonate standard	Bel	3700	180.36	20.5145	3.61e-12	0.001	0	-0.19	0	FALSE	C:\Nu Stable\Analyses\CLUMPED-SEQUENCES\Clumped NuCarb.seq	4	20	20	7.97e-08	7.96e-08	-9.98911	0.000451054	0	-10.134	0.000860287	20.4627	0	0.048632	0.000431788	0	-10.1808	0.000859552	-10.4351	0.00680124	1	-20.3048	0.0238376	0	-42.6359	0.80252	0	-0.481335	0.00685889	1	-0.0478541
3079_ETH4-1	ETH4-1	2.02103e+07	2021-03-21 21:03:00	2021_03_21_bellows	3079	Carb	ETH4	ETH carbonate standard	Bel	4000	195.92	20.4165	3.72e-12	0.001	0	-0.13	0	FALSE	C:\Nu Stable\Analyses\CLUMPED-SEQUENCES\Clumped NuCarb + auto refill - short - 25nA.seq	4	20	20	7.96e-08	7.96e-08	-10.0214	0.000452955	0	-10.1996	0.000915195	20.3951	0	0.0158759	0.000438343	0	-10.2463	0.000914532	-10.5527	0.00596066	0	-20.449	0.0195317	0	-48.6845	0.89529	0	-0.501145	0.00602388	0	-0.0625679
3102_ETH4-2	ETH4-2	2.02103e+07	2021-03-23 18:34:00	2021_03_21_bellows	3102	Carb	ETH4	ETH carbonate standard	Bel	3900	191.04	20.4146	3.68e-12	0.001	0	0.14	0	FALSE	C:\Nu Stable\Analyses\CLUMPED-SEQUENCES\Clumped NuCarb.seq	4	20	20	7.96e-08	7.95e-08	-9.95387	0.000640138	0	-10.0456	0.00104004	20.5539	0	0.0849981	0.00062185	0	-10.0923	0.00103958	-10.3153	0.00612648	1	-20.1249	0.0220974	0	-40.5805	0.955209	0	-0.488241	0.00647846	0	-0.0428941
CARARRA MARBLE IN-HOUSE CARBONATE STANDARD
2673_CM-1	CM-1	2.02102e+07	2021-02-03 02:50:00	2021_02_02_bellows	2673	Carb	CM	In house standard	Bel	3300	159.97	20.6289	3.58e-12	0.001	0	-1.66	0	FALSE	C:\Nu Stable\Analyses\CLUMPED-SEQUENCES\Clumped NuCarb.seq	4	20	20	7.54e-08	7.57e-08	2.16683	0.00051859	0	6.30714	0.00100842	37.4121	0	12.094	0.000506052	0	6.26903	0.00100787	18.17	0.00558422	0	12.4196	0.0238472	0	5.47294	0.8036	0	-0.541945	0.00555962	0	-0.155701
2684_CM-2	CM-2	2.02102e+07	2021-02-03 22:53:00	2021_02_02_bellows	2684	Carb	CM	In house standard	Bel	3400	161.8	21.0136	3.53e-12	0.001	0	-1.72	0	FALSE	C:\Nu Stable\Analyses\CLUMPED-SEQUENCES\Clumped NuCarb.seq	4	20	20	7.7e-08	7.73e-08	2.17496	0.000491693	0	6.40266	0.000761805	37.5106	0	12.105	0.000471977	0	6.36447	0.000761309	18.2836	0.00734462	1	12.6708	0.0216979	1	8.28991	1.01542	1	-0.53499	0.00712489	1	-0.0975028
2695_CM-3	CM-3	2.02102e+07	2021-02-04 18:19:00	2021_02_02_bellows	2695	Carb	CM	In house standard	Bel	3500	163.02	21.4698	3.46e-12	0.001	0	-12.77	0	FALSE	C:\Nu Stable\Analyses\CLUMPED-SEQUENCES\Clumped NuCarb.seq	4	20	20	7.67e-08	1.04e-07	2.30487	0.00114206	0	6.62648	0.00181985	37.7413	1	12.2354	0.00114775	0	6.58833	0.00181947	18.6289	0.00744201	1	13.4426	0.0237503	0	27.3489	0.702954	1	-0.548573	0.00654437	0	0.222705
2725_CM-1	CM-1	2.02102e+07	2021-02-07 18:45:00	2020_02_07_bellows	2725	Carb	CM	In house standard	Bel	3700	182.62	20.2607	3.76e-12	0.001	0	-0.69	0	FALSE	C:\Nu Stable\Analyses\CLUMPED-SEQUENCES\Clumped NuCarb.seq	4	20	20	7.95e-08	7.95e-08	2.24718	0.000517954	0	6.6803	0.000763847	37.7968	0	12.1829	0.000495851	0	6.64198	0.000763327	18.6023	0.00629139	0	13.1154	0.0201441	0	1.43155	0.82468	1	-0.572254	0.00608401	0	-0.209797
2729_CM-1	CM-1	2.02102e+07	2021-02-08 17:57:00	2020_02_08_bellows	2729	Carb	CM	In house standard	Bel	3500	167.11	20.9443	3.59e-12	0.001	0	-0.83	0	FALSE	C:\Nu Stable\Analyses\CLUMPED-SEQUENCES\Clumped NuCarb.seq	4	20	20	7.97e-08	7.97e-08	2.17542	0.000512029	0	6.46818	0.000854844	37.5781	0	12.1078	0.000493307	0	6.42993	0.000854305	18.331	0.00683561	1	12.7116	0.0214169	0	0.910304	0.956955	0	-0.557402	0.00679337	0	-0.187034
2752_CM-2	CM-2	2.02102e+07	2021-02-10 16:41:00	2020_02_08_bellows	2752	Carb	CM	In house standard	Bel	3200	147.06	21.7598	3.41e-12	0.001	0	-1.17	0	FALSE	C:\Nu Stable\Analyses\CLUMPED-SEQUENCES\Clumped NuCarb.seq	4	20	20	6.78e-08	7.51e-08	2.14023	0.00186952	0	6.36023	0.00370134	37.4668	0	12.0708	0.00188822	0	6.32201	0.00370131	18.199	0.00944648	0	12.5868	0.0216474	0	9.70729	1.08812	0	-0.541541	0.00634633	0	-0.0959019
2793_CM-1	CM-1	2.02102e+07	2021-02-14 13:46:00	2021_02_14_bellows	2793	Carb	CM	In house standard	Bel	3800	165.31	22.9871	3.28e-12	0.001	0	-0.92	0	FALSE	C:\Nu Stable\Analyses\CLUMPED-SEQUENCES\Clumped NuCarb.seq	4	20	20	7.96e-08	7.96e-08	2.2526	0.00053716	0	6.69902	0.00126631	37.8161	0	12.1886	0.000517025	0	6.66069	0.00126522	18.6361	0.00725519	0	13.1512	0.025427	0	6.75045	0.8579	0	-0.563303	0.0071713	0	-0.211587
2818_CM-2	CM-2	2.02102e+07	2021-02-16 13:57:00	2021_02_14_bellows	2818	Carb	CM	In house standard	Bel	3800	190.83	19.913	3.89e-12	0.001	0	-1.1	0	FALSE	C:\Nu Stable\Analyses\CLUMPED-SEQUENCES\Clumped NuCarb.seq	4	20	20	7.96e-08	7.96e-08	2.16189	0.000473892	0	6.49155	0.000751685	37.6022	0	12.0958	0.000449679	0	6.45324	0.00075098	18.3553	0.0057486	0	12.8293	0.0235744	0	6.87464	0.879075	0	-0.541779	0.00572134	0	-0.117164
2828_CM-1	CM-1	2.02102e+07	2021-02-19 03:15:00	2021_02_18_bellows	2828	Carb	CM	In house standard	Bel	3500	173.13	20.216	3.75e-12	0.001	0	-0.74	0	FALSE	C:\Nu Stable\Analyses\CLUMPED-SEQUENCES\Clumped NuCarb.seq	4	20	20	7.97e-08	7.96e-08	2.19162	0.000460034	0	6.4835	0.000941715	37.5939	0	12.1236	0.000440678	0	6.44526	0.000940906	18.4027	0.00585759	0	12.8261	0.0223412	0	15.8161	0.945592	0	-0.515762	0.00577501	0	-0.104457
2839_CM-1	CM-1	2.02102e+07	2021-02-21 16:06:00	2021_02_21_bellows	2839	Carb	CM	In house standard	Bel	3400	169.28	20.0851	3.75e-12	0.001	0	-0.72	0	FALSE	C:\Nu Stable\Analyses\CLUMPED-SEQUENCES\Clumped NuCarb.seq	4	20	20	7.97e-08	7.97e-08	2.20819	0.000484701	0	6.5503	0.00173684	37.6628	0	12.1415	0.000478839	0	6.51202	0.00173536	18.4526	0.0068229	0	12.9326	0.0232908	0	3.6275	0.877364	0	-0.550221	0.00641963	0	-0.132024
2856_CM-2	CM-2	20210223	2021-02-23 00:23:00	2021_02_21_bellows	2856	Carb	CM	In house standard	Bel	3400	161.96	20.9928	3.55e-12	0.0051398	0	-0.85	0	FALSE	C:\Nu Stable\Analyses\CLUMPED-SEQUENCES\Clumped NuCarb + auto refill - short.seq	4	20	20	7.73e-08	7.76e-08	2.03476	0.000540133	0	5.9508	0.00120659	37.0447	0	11.957	0.000533742	0	5.91277	0.00120596	17.6772	0.00578531	0	11.7934	0.0237838	0	10.6607	0.77494	0	-0.538255	0.00581622	0	-0.0661692
2882_CM-3	CM-3	2.02102e+07	2021-02-25 01:07:00	2021_02_21_bellows	2882	Carb	CM	In house standard	Bel	3400	160.83	21.1403	3.54e-12	0.0029962	0	-0.72	0	FALSE	C:\Nu Stable\Analyses\CLUMPED-SEQUENCES\Clumped NuCarb.seq	4	20	20	7.7e-08	7.73e-08	2.05575	0.000430505	0	6.15072	0.000965192	37.2508	0	11.9838	0.000403691	0	6.11253	0.000964094	17.9142	0.00649584	1	12.1645	0.0219561	0	14.7977	0.90291	0	-0.52794	0.00626789	1	-0.0966089
2917_CM-1	CM-1	2.02103e+07	2021-03-01 04:53:00	2021_02_28_bellows	2917	Carb	CM	In house standard	Bel	3400	167.72	20.2719	3.72e-12	0.0010892	0	-0.76	0	FALSE	C:\Nu Stable\Analyses\CLUMPED-SEQUENCES\Clumped NuCarb.seq	4	20	20	7.97e-08	7.97e-08	2.06009	0.000494976	0	6.2364	0.00078338	37.3392	0	11.9908	0.000469862	0	6.19814	0.000782652	17.9964	0.00607706	0	12.3542	0.0191419	0	9.5691	0.928096	0	-0.537984	0.00603101	0	-0.0794432
2947_CM-1	CM-1	2.02103e+07	2021-03-09 16:56:00	2021_03_09_bellows	2947	Carb	CM	In house standard	Bel	3900	194.18	20.0845	3.73e-12	0.001	0	-0.2	0	TRUE	C:\Nu Stable\Analyses\CLUMPED-SEQUENCES\Clumped NuCarb.seq	4	20	20	7.96e-08	7.95e-08	2.22512	0.000468203	0	6.66309	0.00128786	37.779	0	12.1615	0.00044837	0	6.62474	0.00128663	18.5023	0.00697735	0	12.818	0.0244775	0	-15.0374	0.821652	0	-0.631742	0.00679724	0	-0.469048
2962_CM-2	CM-2	2.02103e+07	2021-03-10 20:50:00	2021_03_09_bellows	2962	Carb	CM	In house standard	Bel	3600	177.12	20.3252	3.62e-12	0.001	0	-0.39	0	TRUE	C:\Nu Stable\Analyses\CLUMPED-SEQUENCES\Clumped NuCarb.seq	4	20	20	7.97e-08	7.97e-08	2.24302	0.000476855	0	6.74157	0.00136753	37.86	0	12.1811	0.000450811	0	6.70318	0.00136608	18.6388	0.00627994	0	13.2469	0.0230355	0	0.428517	0.852943	0	-0.594342	0.00620676	0	-0.201608
2979_CM-3	CM-3	2.02103e+07	2021-03-12 07:02:00	2021_03_09_bellows	2979	Carb	CM	In house standard	Bel	3800	191.44	19.8496	3.79e-12	0.001	0	0.42	0	TRUE	C:\Nu Stable\Analyses\CLUMPED-SEQUENCES\Clumped NuCarb.seq	4	20	20	7.96e-08	7.95e-08	2.22767	0.000470202	0	6.68685	0.000875386	37.8035	0	12.1647	0.000446786	0	6.64848	0.000874553	18.5869	0.00620256	0	13.1082	0.0213566	0	0.697953	0.991188	0	-0.57525	0.00611865	0	-0.22982
2986_CM-4	CM-4	2.02103e+07	2021-03-12 19:26:00	2021_03_09_bellows	2986	Carb	CM	In house standard	Bel	3500	172.42	20.2993	3.63e-12	0.001	0	-0.21	0	TRUE	C:\Nu Stable\Analyses\CLUMPED-SEQUENCES\Clumped NuCarb.seq	4	20	20	7.97e-08	7.97e-08	2.23733	0.000444843	0	6.67254	0.0011232	37.7888	0	12.1733	0.00042393	0	6.6342	0.0011221	18.5736	0.00686058	0	13.1563	0.0221332	0	-1.31691	0.925271	0	-0.58311	0.0067283	0	-0.153943
3007_CM-1	CM-1	2.02103e+07	2021-03-14 17:37:00	2021_03_14_bellows	3007	Carb	CM	In house standard	Bel	3700	185.09	19.9903	3.71e-12	0.001	0	0.02	0	FALSE	C:\Nu Stable\Analyses\CLUMPED-SEQUENCES\Clumped NuCarb.seq	4	20	20	7.95e-08	7.95e-08	2.24236	0.000497928	0	6.74603	0.000732909	37.8646	0	12.1806	0.000473737	0	6.70763	0.000732289	18.6632	0.00572855	0	13.2873	0.0268327	0	4.91881	0.753585	0	-0.574309	0.00574184	0	-0.170518
3031_CM-2	CM-2	2.02103e+07	2021-03-16 15:53:00	2021_03_14_bellows	3031	Carb	CM	In house standard	Bel	3800	184.23	20.6264	3.6e-12	0.001	0	-0.21	0	FALSE	C:\Nu Stable\Analyses\CLUMPED-SEQUENCES\Clumped NuCarb.seq	4	20	20	7.96e-08	7.95e-08	2.25921	0.000461027	0	6.71997	0.000948895	37.8377	0	12.1956	0.000436973	0	6.68163	0.00094794	18.6558	0.00583381	0	13.2746	0.0231633	0	4.01093	0.983475	0	-0.571455	0.00585982	0	-0.13141
3065_CM-3	CM-3	2.02103e+07	2021-03-19 04:51:00	2021_03_14_bellows	3065	Carb	CM	In house standard	Bel	3700	186.68	19.82	3.78e-12	0.001	0	-0.22	0	FALSE	C:\Nu Stable\Analyses\CLUMPED-SEQUENCES\Clumped NuCarb.seq	4	20	20	7.95e-08	7.95e-08	2.26193	0.000522944	0	6.7148	0.000635486	37.8324	0	12.198	0.00049677	0	6.67647	0.000634976	18.6367	0.00567534	0	13.2665	0.0213825	0	2.21053	0.930951	0	-0.587633	0.00558783	0	-0.129172
3082_CM-1	CM-1	2.02103e+07	2021-03-22 03:06:00	2021_03_21_bellows	3082	Carb	CM	In house standard	Bel	3500	170.32	20.5496	3.58e-12	0.001	0	-0.2	0	FALSE	C:\Nu Stable\Analyses\CLUMPED-SEQUENCES\Clumped NuCarb + auto refill - short - 25nA.seq	4	20	20	7.94e-08	7.95e-08	2.22924	0.00049432	0	6.64625	0.000668303	37.7617	0	12.1647	0.000467702	0	6.60792	0.000667649	18.5349	0.00678398	0	13.0537	0.0272647	0	-2.59685	0.909036	0	-0.586672	0.00667117	0	-0.202976
OOIDS IN-HOUSE CARBONATE STANDARD
2672_Ooids-1	Ooids-1	20210203	2021-02-03 00:22:00	2021_02_02_bellows	2672	Carb	OO	In house standard	Bel	4100	161.29	25.4201	2.9e-12	0.001	0	-0.77	0	FALSE	C:\Nu Stable\Analyses\CLUMPED-SEQUENCES\Clumped NuCarb + auto refill - short.seq	4	20	20	7.68e-08	7.71e-08	5.07885	0.000523186	0	8.89751	0.000832878	40.0825	0	14.9319	0.000501861	0	8.86287	0.000832307	23.9475	0.00658516	0	17.6102	0.0248421	0	3.27489	0.656189	1	-0.303502	0.00638741	0	-0.190557
2681_Ooids-2	Ooids-2	2.02102e+07	2021-02-03 17:31:00	2021_02_02_bellows	2681	Carb	OO	In house standard	Bel	4100	175.84	23.3167	3.24e-12	0.0064358	0	-1.73	0	FALSE	C:\Nu Stable\Analyses\CLUMPED-SEQUENCES\Clumped NuCarb.seq	4	20	20	7.96e-08	7.96e-08	5.00233	0.00057819	0	8.6512	0.00119369	39.8286	0	14.8511	0.000565036	0	8.61666	0.001193	23.6544	0.00678281	0	17.3034	0.0210769	0	11.3015	0.738796	0	-0.267766	0.00626092	0	-0.00395914
2689_Ooids-3	Ooids-3	2.02102e+07	2021-02-04 07:48:00	2021_02_02_bellows	2689	Carb	OO	In house standard	Bel	3800	166.66	22.8009	3.28e-12	0.003837	0	-1.75	0	FALSE	C:\Nu Stable\Analyses\CLUMPED-SEQUENCES\Clumped NuCarb.seq	4	20	20	7.95e-08	7.95e-08	5.05841	0.00060061	0	8.80803	0.00102584	39.9903	0	14.9095	0.000581362	0	8.77344	0.00102527	23.8582	0.00729735	0	17.5478	0.0220244	0	14.5128	0.89641	0	-0.280826	0.00714085	0	-0.0746523
2723_Ooids-1	Ooids-1	2.02102e+07	2021-02-07 15:14:00	2020_02_07_bellows	2723	Carb	OO	In house standard	Bel	3600	171.54	20.9864	3.58e-12	0.001	0	-0.69	0	FALSE	C:\Nu Stable\Analyses\CLUMPED-SEQUENCES\Clumped NuCarb.seq	4	20	20	7.97e-08	7.97e-08	5.09359	0.000494087	0	8.91975	0.000846117	40.1055	0	14.9466	0.000475557	0	8.88512	0.000845552	23.9957	0.00618145	0	17.7514	0.0216605	0	8.81373	0.891931	0	-0.293063	0.00595384	0	-0.0959581
2727_Ooids-1	Ooids-1	2.02102e+07	2021-02-08 13:43:00	2020_02_08_bellows	2727	Carb	OO	In house standard	Bel	3400	160.74	21.1522	3.53e-12	0.001	0	-0.66	0	FALSE	C:\Nu Stable\Analyses\CLUMPED-SEQUENCES\Clumped NuCarb.seq	4	20	20	7.69e-08	7.72e-08	5.07985	0.000607193	0	8.89921	0.000973588	40.0843	0	14.9329	0.000586298	0	8.86458	0.000973063	23.9757	0.00661023	0	17.6657	0.0224974	0	5.54577	0.928492	0	-0.278669	0.00643606	0	-0.139394
2761_Ooids-2	Ooids-2	2.02102e+07	2021-02-11 09:28:00	2020_02_08_bellows	2761	Carb	OO	In house standard	Bel	3500	157.04	22.2873	3.32e-12	0.003429	0	-1.1	0	FALSE	C:\Nu Stable\Analyses\CLUMPED-SEQUENCES\Clumped NuCarb.seq	4	20	20	7.37e-08	7.4e-08	4.96293	0.000490694	0	8.62002	0.000873924	39.7965	0	14.8128	0.000468122	0	8.58543	0.00087317	23.6318	0.00747505	1	17.2481	0.0277734	0	24.5842	0.88545	1	-0.219878	0.00719429	1	0.0036172
2795_Ooids-1	Ooids-1	2.02102e+07	2021-02-14 17:18:00	2021_02_14_bellows	2795	Carb	OO	In house standard	Bel	3900	149.02	26.171	2.83e-12	0.001	0	-0.53	0	FALSE	C:\Nu Stable\Analyses\CLUMPED-SEQUENCES\Clumped NuCarb.seq	4	20	20	6.93e-08	6.96e-08	5.08386	0.000474425	0	8.92282	0.000969374	40.1086	0	14.9375	0.000454617	0	8.88817	0.000968551	24.0014	0.00552134	0	17.7923	0.0248636	0	10.1427	0.899926	0	-0.281252	0.00516366	0	-0.0617511
2809_Ooids-2	Ooids-2	2.02102e+07	2021-02-15 21:38:00	2021_02_14_bellows	2809	Carb	OO	In house standard	Bel	3800	179.78	21.1369	3.6e-12	0.001911	0	-1.15	0	FALSE	C:\Nu Stable\Analyses\CLUMPED-SEQUENCES\Clumped NuCarb.seq	4	20	20	7.95e-08	7.95e-08	5.00107	0.000578757	0	8.73179	0.0019215	39.9117	0	14.8527	0.000580985	0	8.69716	0.00192011	23.76	0.00645333	0	17.3713	0.0238019	0	20.3671	1.0734	0	-0.244706	0.00634659	0	-0.096822
2821_Ooids-1	Ooids-1	2.02102e+07	2021-02-18 12:43:00	2021_02_18_bellows	2821	Carb	OO	In house standard	Bel	3600	151	23.8411	3.08e-12	0.001	0	-0.97	0	FALSE	C:\Nu Stable\Analyses\CLUMPED-SEQUENCES\Clumped NuCarb.seq	4	20	20	6.94e-08	6.97e-08	4.97861	0.000534408	0	8.56217	0.000947447	39.7368	0	14.8256	0.000519161	0	8.52767	0.000946956	23.5845	0.00545842	0	17.1376	0.0274546	0	23.4083	1.01125	1	-0.223375	0.0054231	0	0.00946575
2838_Ooids-1	Ooids-1	2.02102e+07	2021-02-21 14:20:00	2021_02_21_bellows	2838	Carb	OO	In house standard	Bel	4000	196.29	20.378	3.79e-12	0.001	0	-0.75	0	FALSE	C:\Nu Stable\Analyses\CLUMPED-SEQUENCES\Clumped NuCarb.seq	4	20	20	7.96e-08	7.96e-08	5.07527	0.000452621	0	8.94419	0.00230427	40.1307	1	14.9302	0.000448783	0	8.9095	0.00230178	24.0358	0.00724353	0	17.7941	0.0255097	0	11.9347	0.908219	0	-0.262446	0.00692208	0	-0.105197
2865_Ooids-2	Ooids-2	2.02102e+07	2021-02-23 17:50:00	2021_02_21_bellows	2865	Carb	OO	In house standard	Bel	4000	173.31	23.08	3.29e-12	0.010091	0	-0.82	PumpOver	FALSE	C:\Nu Stable\Analyses\CLUMPED-SEQUENCES\Clumped NuCarb.seq	4	20	20	7.97e-08	7.96e-08	4.84519	0.000466113	0	8.2542	0.00118325	39.4193	0	14.689	0.000448628	0	8.21973	0.0011822	23.1163	0.00709187	0	16.5322	0.0256987	0	27.4879	1.09869	0	-0.241731	0.00699735	0	0.0248708
2910_Ooids-1	Ooids-1	2.02102e+07	2021-02-28 15:09:00	2021_02_28_bellows	2910	Carb	OO	In house standard	Bel	3700	176.39	20.9762	3.63e-12	0.001	0	-1.01	0	FALSE	C:\Nu Stable\Analyses\CLUMPED-SEQUENCES\Clumped NuCarb.seq	4	20	20	7.96e-08	7.95e-08	5.07057	0.000471095	0	8.91609	0.00113775	40.1017	0	14.9247	0.000456498	0	8.88142	0.00113685	23.9833	0.00682923	1	17.7337	0.0249704	0	4.54117	0.966555	1	-0.2794	0.00648251	1	-0.105952
2944_2021_03_03_bellows 2	Ooids-1	2.02103e+07	2021-03-03 19:29:00	2021_03_03_bellows	2944	NA	OO	In house standard	Bel	4000	195.16	20.496	3.64e-12	0.001	0	-1.03	0	0	NA	4	20	20	7.96e-08	7.95e-08	5.06519	0.000403907	0	8.91084	0.0012561	40.0963	0	14.9195	0.000386224	0	8.87616	0.00125486	23.9679	0.00580393	0	17.7141	0.0236834	0	14.0361	1.1594	0	-0.283911	0.00601176	0	-0.114873
2954_Ooids-1	Ooids-1	2.02103e+07	2021-03-10 06:02:00	2021_03_09_bellows	2954	Carb	OO	In house standard	Bel	4000	189.76	21.0793	3.55e-12	0.001	0	-0.41	0	TRUE	C:\Nu Stable\Analyses\CLUMPED-SEQUENCES\Clumped NuCarb + auto refill - short - 25nA.seq	4	20	20	7.96e-08	7.95e-08	5.07388	0.000497182	0	8.90279	0.000948503	40.088	0	14.9274	0.000473685	0	8.86814	0.00094764	23.9602	0.00648924	0	17.7316	0.0209966	0	8.62344	0.888683	1	-0.291694	0.00619177	0	-0.0817289
2957_Ice-2	Ooids-2	2.02103e+07	2021-03-10 11:59:00	2021_03_09_bellows	2957	Carb	OO	In house standard	Bel	3700	191.16	19.3555	3.86e-12	0.001	0	-0.31	0	TRUE	C:\Nu Stable\Analyses\CLUMPED-SEQUENCES\Clumped NuCarb + auto refill - short - 25nA.seq	4	20	20	7.96e-08	7.95e-08	5.07125	0.000491771	0	8.86863	0.00202354	40.0528	1	14.9237	0.000462297	0	8.83401	0.00202123	23.8914	0.00676008	0	17.6261	0.0244419	0	1.25318	0.81994	0	-0.323185	0.00642254	0	-0.120166
2966_Ooids-3	Ooids-3	2.02103e+07	2021-03-11 03:53:00	2021_03_09_bellows	2966	Carb	OO	In house standard	Bel	3900	183.81	21.2176	3.49e-12	0.001	0	-0.1	0	TRUE	C:\Nu Stable\Analyses\CLUMPED-SEQUENCES\Clumped NuCarb + auto refill - short - 25nA.seq	4	20	20	7.96e-08	7.95e-08	5.08879	0.000542432	0	8.93203	0.00157433	40.1181	0	14.9425	0.000525961	0	8.89738	0.00157295	23.9857	0.00622886	0	17.7679	0.0255979	0	5.98054	0.971549	0	-0.310591	0.00575103	0	-0.10401
3005_Ooids-1	Ooids-1	2.02103e+07	2021-03-14 14:03:00	2021_03_14_bellows	3005	Carb	OO	In house standard	Bel	3900	192.2	20.2914	3.69e-12	0.001	0	0.19	0	FALSE	C:\Nu Stable\Analyses\CLUMPED-SEQUENCES\Clumped NuCarb.seq	4	20	20	7.95e-08	7.95e-08	5.10354	0.000472395	0	8.93405	0.000869673	40.1202	0	14.9564	0.000447723	0	8.89943	0.000868814	24.0067	0.00655821	0	17.7859	0.0235563	0	6.43375	0.941975	0	-0.306326	0.00647431	0	-0.09044
3022_Ooids-2	Ooids-2	2.02103e+07	2021-03-15 21:47:00	2021_03_14_bellows	3022	Carb	OO	In house standard	Bel	4200	209.29	20.0678	3.8e-12	0.001	0	0.08	0	FALSE	C:\Nu Stable\Analyses\CLUMPED-SEQUENCES\Clumped NuCarb.seq	4	20	20	7.97e-08	7.96e-08	5.08073	0.000434737	0	8.89795	0.000763984	40.083	0	14.9337	0.000418411	0	8.86332	0.000763458	23.9662	0.0073747	0	17.7002	0.0224888	0	8.67052	0.926413	0	-0.287503	0.00720623	0	-0.103078
3056_Ooids-3	Ooids-3	2.02103e+07	2021-03-18 12:11:00	2021_03_14_bellows	3056	Carb	OO	In house standard	Bel	3600	180.48	19.9468	3.72e-12	0.001	0	-0.21	0	FALSE	C:\Nu Stable\Analyses\CLUMPED-SEQUENCES\Clumped NuCarb.seq	4	20	20	7.97e-08	7.96e-08	5.09626	0.000531546	0	8.92072	0.000798702	40.1065	0	14.9491	0.000506795	0	8.8861	0.000798066	24.0011	0.00598888	0	17.739	0.0218799	0	10.8767	0.964136	0	-0.291383	0.00572824	0	-0.110028
3075_Ooids-1	Ooids-1	2.02103e+07	2021-03-21 13:17:00	2021_03_21_bellows	3075	Carb	OO	In house standard	Bel	4000	190.95	20.9479	3.58e-12	0.001	0	-0.15	0	FALSE	C:\Nu Stable\Analyses\CLUMPED-SEQUENCES\Clumped NuCarb.seq	4	20	20	7.96e-08	7.95e-08	5.09252	0.000510415	0	8.95337	0.00103236	40.1401	0	14.9467	0.000476632	0	8.91871	0.00103112	23.9979	0.00589216	0	17.7882	0.0247518	0	-1.80066	0.955368	0	-0.323785	0.0058624	0	-0.126343
CORS IN-HOUSE CARBONATE STANDARD
2677_CORS-1	CORS-1	2.02102e+07	2021-02-03 10:38:00	2021_02_02_bellows	2677	Carb	CORS	In house standard	Bel	3500	153.5	22.8013	3.24e-12	0.001	0	-1.71	0	FALSE	C:\Nu Stable\Analyses\CLUMPED-SEQUENCES\Clumped NuCarb + auto refill - short.seq	4	20	20	7.13e-08	7.16e-08	-3.46284	0.00059057	0	4.56149	0.00089081	35.6125	0	6.72154	0.000565986	0	4.51333	0.000890207	11.1608	0.00635963	0	8.95988	0.0229538	0	-3.85111	0.926139	0	-0.241171	0.00634526	0	-0.0863115
2688_CORS-2	CORS-2	2.02102e+07	2021-02-04 06:02:00	2021_02_02_bellows	2688	Carb	CORS	In house standard	Bel	3500	160.74	21.7743	3.38e-12	0.001	0	-1.82	0	FALSE	C:\Nu Stable\Analyses\CLUMPED-SEQUENCES\Clumped NuCarb.seq	4	20	20	7.55e-08	7.58e-08	-3.48658	0.000544078	0	4.49221	0.000939471	35.5411	0	6.69672	0.000521139	0	4.44407	0.000938736	11.0501	0.00516388	0	8.87065	0.0251227	0	2.02756	0.79852	0	-0.257413	0.00500056	0	-0.0368532
2709_CORS-3	CORS-3	2.02102e+07	2021-02-05 19:34:00	2021_02_02_bellows	2709	Carb	CORS	In house standard	Bel	3300	149.48	22.0765	3.33e-12	0.0022367	0	-22.06	BalPct	FALSE	C:\Nu Stable\Analyses\CLUMPED-SEQUENCES\Clumped NuCarb.seq	4	20	20	6.8e-08	1.04e-07	-3.28382	0.00234318	0	4.77715	0.00456992	35.8348	0	6.89798	0.00236624	0	4.72914	0.00456998	11.5403	0.00770924	0	9.81023	0.0247001	0	22.75	1.00413	0	-0.257921	0.00558124	0	0.326562
2836_CORS-1	CORS-1	2.02102e+07	2021-02-19 18:15:00	2021_02_18_bellows	2836	Carb	CORS	In house standard	Bel	3400	142.46	23.8663	3.07e-12	0.001	0	-1.41	0	FALSE	C:\Nu Stable\Analyses\CLUMPED-SEQUENCES\Clumped NuCarb.seq	4	20	20	6.43e-08	7.78e-08	-3.4478	0.00278255	0	4.47003	0.00530215	35.5182	0	6.73253	0.0028054	0	4.42199	0.00530234	11.1863	0.0105961	5	9.05152	0.0345966	0	33.4824	1.23416	0	-0.152348	0.00661943	0	0.186381
2926_CORS-1	CORS-1	2.02103e+07	2021-03-01 20:52:00	2021_02_28_bellows	2926	Carb	CORS	In house standard	Bel	3800	174.84	21.7342	3.51e-12	0.001	0	-0.72	0	FALSE	C:\Nu Stable\Analyses\CLUMPED-SEQUENCES\Clumped NuCarb.seq	4	20	20	7.96e-08	7.95e-08	-3.50139	0.000603221	0	4.55162	0.00112651	35.6023	0	6.68482	0.000578061	0	4.50339	0.00112559	11.1066	0.00636462	0	8.97483	0.0229425	0	1.84591	0.922149	0	-0.247421	0.0062752	0	-0.0516954
2942_2021_03_03_bellows 1	CORS-1	2.02103e+07	2021-03-03 15:58:00	2021_03_03_bellows	2942	NA	CORS	In house standard	Bel	3600	176.36	20.4128	3.51e-12	0.001	0	-0.78	0	0	NA	4	20	20	7.98e-08	7.97e-08	-3.41482	0.000794452	0	4.89277	0.00202526	35.954	0	6.77842	0.000778309	0	4.84436	0.00202377	11.53	0.00732988	0	9.46718	0.0266007	0	0.354639	1.44633	0	-0.258318	0.00690188	0	-0.242598
2958_Ooids-2	CORS-1	2.02103e+07	2021-03-10 13:47:00	2021_03_09_bellows	2958	Carb	CORS	In house standard	Bel	4000	186.28	21.4731	3.44e-12	0.001	0	-0.38	0	TRUE	C:\Nu Stable\Analyses\CLUMPED-SEQUENCES\Clumped NuCarb.seq	4	20	20	7.95e-08	7.95e-08	-3.36893	0.000460363	0	4.77236	0.00186232	35.8299	1	6.81756	0.000450645	0	4.72418	0.00186035	11.4263	0.0067322	0	9.34176	0.0248607	0	-8.15899	0.90401	0	-0.284786	0.00664929	0	-0.130424
ICE IN-HOUSE CARBONATE STANDARD
2669_Ice-1	Ice-1	2.02102e+07	2021-02-02 17:39:00	2021_02_02_bellows	2669	Carb	xIce	In house standard	Bel	3500	173.13	20.216	3.69e-12	0.001	0	-0.88	0	FALSE	C:\Nu Stable\Analyses\CLUMPED-SEQUENCES\Clumped NuCarb.seq	4	20	20	7.97e-08	7.97e-08	2.42366	0.000505388	0	11.0644	0.000929489	42.3164	0	12.5023	0.000485975	0	11.0218	0.000928848	23.6411	0.00609688	0	22.0121	0.0228088	0	11.3944	0.800071	0	-0.231509	0.00586098	0	-0.149629
2680_Ice-2	Ice-2	2.02102e+07	2021-02-03 15:44:00	2021_02_02_bellows	2680	Carb	xIce	In house standard	Bel	3600	168.82	21.3245	3.51e-12	0.001	0	-1.72	0	FALSE	C:\Nu Stable\Analyses\CLUMPED-SEQUENCES\Clumped NuCarb.seq	4	20	20	7.97e-08	7.97e-08	2.38523	0.000532986	0	10.7823	0.001064	42.0256	0	12.4562	0.000517562	0	10.74	0.00106337	23.3224	0.00607996	0	21.5126	0.023979	0	14.3764	0.647432	0	-0.221793	0.00584847	0	-0.0808608
2692_Ice-3	Ice-3	2.02102e+07	2021-02-04 12:51:00	2021_02_02_bellows	2692	Carb	xIce	In house standard	Bel	3600	163.42	22.0291	3.36e-12	0.001	0	-1.59	0	FALSE	C:\Nu Stable\Analyses\CLUMPED-SEQUENCES\Clumped NuCarb + auto refill - short.seq	4	20	20	7.79e-08	7.82e-08	2.36203	0.000539681	0	10.632	0.00102712	41.8706	0	12.4291	0.000527571	0	10.5897	0.00102667	23.1193	0.00626163	0	21.2533	0.0212289	0	12.943	0.849632	0	-0.246438	0.00607503	0	-0.0373546
2716_Ice-4	Ice-4	2.02102e+07	2021-02-06 08:14:00	2021_02_02_bellows	2716	Carb	xIce	In house standard	Bel	3800	175.32	21.6747	3.48e-12	0.001	0	-5.24	0	FALSE	C:\Nu Stable\Analyses\CLUMPED-SEQUENCES\Clumped NuCarb.seq	4	20	20	7.96e-08	1.01e-07	2.48313	0.00136904	0	10.747	0.00137066	41.9892	2	12.5472	0.00139234	0	10.7049	0.00137014	23.3723	0.00659333	1	21.8324	0.0248202	0	30.2966	0.804214	0	-0.22992	0.00598394	0	0.310777
2724_Ice-1	Ice-1	2.02102e+07	2021-02-07 17:00:00	2020_02_07_bellows	2724	Carb	xIce	In house standard	Bel	3500	170.81	20.4906	3.67e-12	0.001	0	-0.44	0	FALSE	C:\Nu Stable\Analyses\CLUMPED-SEQUENCES\Clumped NuCarb.seq	4	20	20	7.97e-08	7.97e-08	2.43066	0.000458457	0	11.0587	0.000857969	42.3105	0	12.5087	0.000439134	0	11.0162	0.000857311	23.6511	0.00744872	0	22.0021	0.0239421	0	9.96992	0.888175	0	-0.222748	0.00708044	0	-0.148139
2728_Ice-1	Ice-1	2.02102e+07	2021-02-08 16:11:00	2020_02_08_bellows	2728	Carb	xIce	In house standard	Bel	3700	184.57	20.0466	3.82e-12	0.001	0	-0.41	0	FALSE	C:\Nu Stable\Analyses\CLUMPED-SEQUENCES\Clumped NuCarb.seq	4	20	20	7.95e-08	7.95e-08	2.40172	0.000462702	0	11.0087	0.00131867	42.259	0	12.4797	0.000445918	0	10.9662	0.00131753	23.5544	0.00665924	1	21.9211	0.0257664	0	5.9161	0.829787	0	-0.241441	0.00710928	0	-0.128574
2743_Ice-2	Ice-2	2.02102e+07	2021-02-09 22:30:00	2020_02_08_bellows	2743	Carb	xIce	In house standard	Bel	3600	166.17	21.6646	3.47e-12	0.001	0	-1.32	0	FALSE	C:\Nu Stable\Analyses\CLUMPED-SEQUENCES\Clumped NuCarb.seq	4	20	20	7.94e-08	7.95e-08	2.30243	0.000555693	0	10.507	0.0010381	41.7418	0	12.3685	0.000540985	0	10.4648	0.0010376	22.9643	0.00715166	0	21.0013	0.0229709	0	18.24	1.11611	1	-0.214716	0.00676976	0	-0.0368632
2778_Ice-3	Ice-3	2.02102e+07	2021-02-12 15:38:00	2020_02_08_bellows	2778	Carb	xIce	In house standard	Bel	3400	151.09	22.5031	3.29e-12	0.001	0	-1.18	0	FALSE	C:\Nu Stable\Analyses\CLUMPED-SEQUENCES\Clumped NuCarb.seq	4	20	20	7.03e-08	7.06e-08	2.32841	0.000520612	0	10.6605	0.000884919	41.9001	0	12.3984	0.000498699	0	10.6182	0.000884288	23.1686	0.00690988	0	21.3014	0.0238876	0	22.3796	0.796168	1	-0.194736	0.0067349	0	-0.0466142
2794_Ice-1	Ice-1	2.02102e+07	2021-02-14 15:32:00	2021_02_14_bellows	2794	Carb	xIce	In house standard	Bel	3500	165.53	21.1442	3.54e-12	0.001	0	-0.6	0	FALSE	C:\Nu Stable\Analyses\CLUMPED-SEQUENCES\Clumped NuCarb.seq	4	20	20	7.94e-08	7.95e-08	2.40181	0.000561556	0	10.9781	0.00123937	42.2274	0	12.4787	0.000538958	0	10.9356	0.00123836	23.5437	0.00552203	0	21.944	0.0222863	0	12.9948	0.859281	1	-0.21862	0.00534729	0	-0.0455976
2822_Ice-1	Ice-1	2.02102e+07	2021-02-18 14:28:00	2021_02_18_bellows	2822	Carb	xIce	In house standard	Bel	3700	179.2	20.6473	3.68e-12	0.001	0	-0.65	0	FALSE	C:\Nu Stable\Analyses\CLUMPED-SEQUENCES\Clumped NuCarb.seq	4	20	20	7.95e-08	7.95e-08	2.37868	0.000518949	0	10.8585	0.00182957	42.1042	0	12.4527	0.000509494	0	10.8161	0.00182805	23.3945	0.0073363	1	21.6368	0.0235061	0	15.0363	0.968774	1	-0.218144	0.00715098	0	-0.109868
2873_Ice-1	Ice-1	2.02102e+07	2021-02-24 09:07:00	2021_02_21_bellows	2873	Carb	xIce	In house standard	Bel	3500	156.89	22.3086	3.33e-12	0.0015262	0	-0.72	0	FALSE	C:\Nu Stable\Analyses\CLUMPED-SEQUENCES\Clumped NuCarb.seq	4	20	20	7.37e-08	7.4e-08	2.1969	0.000438252	0	10.2645	0.00085256	41.4918	0	12.2605	0.000421501	0	10.2223	0.000851944	22.6171	0.00698399	0	20.5365	0.0230968	0	21.4021	0.922103	0	-0.208151	0.00677809	0	-0.0122466
2899_Ice-2	Ice-2	2.02102e+07	2021-02-26 11:30:00	2021_02_21_bellows	2899	Carb	xIce	In house standard	Bel	3700	164.12	22.5445	3.33e-12	0.0037517	0	-1.06	0	FALSE	C:\Nu Stable\Analyses\CLUMPED-SEQUENCES\Clumped NuCarb.seq	4	20	20	7.88e-08	7.89e-08	2.1879	0.000416698	0	10.2651	0.000666611	41.4924	0	12.252	0.000401652	0	10.2229	0.000666257	22.6359	0.00623366	0	20.5926	0.0227685	0	26.9529	0.846488	0	-0.181635	0.006166	0	0.0415869
2909_Ice-1	Ice-1	2.02102e+07	2021-02-28 13:23:00	2021_02_28_bellows	2909	Carb	xIce	In house standard	Bel	3500	165.95	21.0907	3.57e-12	0.001	0	-0.76	0	FALSE	C:\Nu Stable\Analyses\CLUMPED-SEQUENCES\Clumped NuCarb.seq	4	20	20	7.96e-08	7.96e-08	2.39869	0.000494131	0	10.9822	0.000758087	42.2317	0	12.4759	0.000471115	0	10.9397	0.000757511	23.5064	0.00661531	0	21.9116	0.0244411	0	7.32648	0.95377	0	-0.256311	0.00641934	0	-0.0854758
2943_2021_03_03_bellows 2	Ice-1	2.02103e+07	2021-03-03 17:44:00	2021_03_03_bellows	2943	NA	xIce	In house standard	Bel	3700	183.26	20.1899	3.62e-12	0.001	0	-0.99	0	0	NA	4	20	20	7.97e-08	7.96e-08	2.39193	0.000424591	0	11.0462	0.00102378	42.2976	0	12.4717	0.00039314	0	11.0036	0.00102255	23.597	0.00725549	0	22.0474	0.0235382	0	20.7108	1.12985	0	-0.225625	0.0069835	0	-0.0789966
2948_Ice-1	Ice-1	2.02103e+07	2021-03-09 18:42:00	2021_03_09_bellows	2948	Carb	xIce	In house standard	Bel	3700	177.89	20.7994	3.53e-12	0.001	0	-0.3	0	TRUE	C:\Nu Stable\Analyses\CLUMPED-SEQUENCES\Clumped NuCarb + auto refill - short - 25nA.seq	4	20	20	7.97e-08	7.96e-08	2.39303	0.000543265	0	11.01	0.000804318	42.2603	0	12.4715	0.000514364	0	10.9674	0.000803574	23.4659	0.00703817	0	21.7484	0.0225743	0	-9.61185	0.8777	1	-0.318347	0.00674026	0	-0.299978
2956_CORS-1	Ice-2	2.02103e+07	2021-03-10 10:14:00	2021_03_09_bellows	2956	Carb	xIce	In house standard	Bel	3600	190.7	18.8778	3.97e-12	0.001	0	-0.39	0	TRUE	C:\Nu Stable\Analyses\CLUMPED-SEQUENCES\Clumped NuCarb.seq	4	20	20	7.95e-08	7.95e-08	2.41212	0.000499328	0	10.9632	0.000824678	42.2121	1	12.4878	0.000471912	0	10.9208	0.000823909	23.4866	0.00584777	0	21.8359	0.0232588	0	7.03272	0.986607	0	-0.267045	0.00604399	0	-0.117438
2965_Ice-2	Ice-2	2.02103e+07	2021-03-11 02:08:00	2021_03_09_bellows	2965	Carb	xIce	In house standard	Bel	3500	169.89	20.6016	3.56e-12	0.001	0	-0.27	0	TRUE	C:\Nu Stable\Analyses\CLUMPED-SEQUENCES\Clumped NuCarb.seq	4	20	20	7.92e-08	7.93e-08	2.41802	0.000480581	0	11.0351	0.0011601	42.2862	0	12.496	0.000461969	0	10.9926	0.00115914	23.5794	0.00708403	0	22.0606	0.0232089	0	8.2564	0.980996	0	-0.256857	0.00683886	0	-0.0443236
2994_Ice-3	Ice-3	2.02103e+07	2021-03-13 11:36:00	2021_03_09_bellows	2994	Carb	xIce	In house standard	Bel	3300	164.03	20.1183	3.63e-12	0.001	0	0.21	0	TRUE	C:\Nu Stable\Analyses\CLUMPED-SEQUENCES\Clumped NuCarb.seq	4	20	20	7.61e-08	7.64e-08	2.40258	0.000479588	0	10.9025	0.00147721	42.1495	0	12.4768	0.000461843	0	10.8601	0.00147589	23.4267	0.00571546	0	21.7369	0.0253371	0	11.1285	0.98898	0	-0.257549	0.00554466	0	-0.0988778
3006_Ice-1	Ice-1	2.02103e+07	2021-03-14 15:50:00	2021_03_14_bellows	3006	Carb	xIce	In house standard	Bel	3700	181.92	20.3386	3.65e-12	0.001	0	-0.18	0	FALSE	C:\Nu Stable\Analyses\CLUMPED-SEQUENCES\Clumped NuCarb + auto refill - short - 25nA.seq	4	20	20	7.96e-08	7.95e-08	2.43281	0.00043649	0	11.1192	0.00102201	42.3729	0	12.5129	0.000416194	0	11.0767	0.00102108	23.6723	0.00598455	0	22.1837	0.0235802	0	3.45664	0.977926	0	-0.265039	0.00593856	0	-0.0902583
3039_Ice-2	Ice-2	2.02103e+07	2021-03-17 06:06:00	2021_03_14_bellows	3039	Carb	xIce	In house standard	Bel	3900	187.68	20.7801	3.61e-12	0.001	0	-0.13	0	FALSE	C:\Nu Stable\Analyses\CLUMPED-SEQUENCES\Clumped NuCarb + auto refill - short - 25nA.seq	4	20	20	7.95e-08	7.95e-08	2.42839	0.000538124	0	11.0533	0.000768386	42.3049	0	12.5064	0.000504191	0	11.0108	0.000767456	23.6022	0.00612673	0	22.0573	0.0200443	0	8.29261	1.01151	0	-0.262826	0.00598736	0	-0.0835226
3076_Ice-1	Ice-1	2.02103e+07	2021-03-21 15:03:00	2021_03_21_bellows	3076	Carb	xIce	In house standard	Bel	3500	167.79	20.8594	3.52e-12	0.001	0	-0.3	0	FALSE	C:\Nu Stable\Analyses\CLUMPED-SEQUENCES\Clumped NuCarb + auto refill - short - 25nA.seq	4	20	20	7.79e-08	7.81e-08	2.41646	0.000662112	0	11.0436	0.000987992	42.2949	0	12.4948	0.000642377	0	11.001	0.000987716	23.5444	0.00778738	0	21.9831	0.0219702	0	-2.12418	0.893675	0	-0.297998	0.00771226	0	-0.136813
3101_Ice-2	Ice-2	2.02103e+07	2021-03-23 16:49:00	2021_03_21_bellows	3101	Carb	xIce	In house standard	Bel	3600	186.19	19.3351	3.86e-12	0.001	0	-0.11	0	FALSE	C:\Nu Stable\Analyses\CLUMPED-SEQUENCES\Clumped NuCarb.seq	4	20	20	7.96e-08	7.95e-08	2.38973	0.000577161	0	10.9421	0.000964771	42.1904	0	12.466	0.000559279	0	10.8996	0.00096433	23.4704	0.00644418	0	21.8202	0.0240667	0	11.1668	0.901643	0	-0.24248	0.00639919	0	-0.0956848
PICA IN-HOUSE CARBONATE STANDARD
2668_Pica-1	Pica-1	2.02102e+07	2021-02-02 15:52:00	2021_02_02_bellows	2668	Carb	Pica	In house standard	Bel	3500	160.92	21.7499	3.4e-12	0.001	0	-1.2	FST	FALSE	C:\Nu Stable\Analyses\CLUMPED-SEQUENCES\Clumped NuCarb - Start.SEQ	4	20	20	7.59e-08	7.62e-08	3.57569	0.000475799	0	9.45014	0.0010137	40.6522	0	13.533	0.000466164	0	9.41179	0.00101316	23.0694	0.00684798	0	18.7493	0.0222013	0	12.7851	0.781717	0	-0.273133	0.0065059	0	-0.159676
2676_Pica-2	Pica-2	2.02102e+07	2021-02-03 08:10:00	2021_02_02_bellows	2676	Carb	Pica	In house standard	Bel	3600	163.91	21.9633	3.39e-12	0.001	0	-1.7	0	FALSE	C:\Nu Stable\Analyses\CLUMPED-SEQUENCES\Clumped NuCarb.seq	4	20	20	7.84e-08	7.86e-08	3.46893	0.000701107	0	9.03883	0.001223	40.2282	0	13.4179	0.000689826	0	9.00065	0.00122273	22.5566	0.00719846	0	18.0648	0.02504	0	12.1889	0.699046	1	-0.256838	0.00679406	0	-0.0170917
2685_Pica-3	Pica-3	20210204	2021-02-04 00:39:00	2021_02_02_bellows	2685	Carb	Pica	In house standard	Bel	3700	170.81	21.6615	3.46e-12	0.001	0	-1.81	0	FALSE	C:\Nu Stable\Analyses\CLUMPED-SEQUENCES\Clumped NuCarb.seq	4	20	20	7.97e-08	7.97e-08	3.47123	0.000600505	0	8.99049	0.000796699	40.1784	0	13.4184	0.000578063	0	8.95237	0.000796379	22.5112	0.00633161	0	17.9296	0.0209135	0	13.1139	0.785973	0	-0.25469	0.0063985	0	-0.0541623
2702_Pica-4	Pica-4	2.02102e+07	2021-02-05 07:01:00	2021_02_02_bellows	2702	Carb	Pica	In house standard	Bel	3700	153.47	24.1089	3.05e-12	0.001	0	-14.59	0	FALSE	C:\Nu Stable\Analyses\CLUMPED-SEQUENCES\Clumped NuCarb + auto refill - short.seq	4	20	20	7.05e-08	9.9e-08	3.71993	0.0020676	0	9.59714	0.00386721	40.8038	0	13.6742	0.00208002	0	9.55894	0.0038676	23.3815	0.00959319	1	19.4187	0.0274059	0	26.548	0.859384	0	-0.254477	0.00635178	1	0.205634
2722_Pica-1	Pica-1	2.02102e+07	2021-02-07 13:27:00	2020_02_07_bellows	2722	Carb	Pica	In house standard	Bel	3300	161.5	20.4334	3.64e-12	0.001	0	-0.96	FST	FALSE	C:\Nu Stable\Analyses\CLUMPED-SEQUENCES\Clumped NuCarb - Start.SEQ	4	20	20	7.7e-08	7.73e-08	3.55451	0.000668139	0	9.38921	0.000963489	40.5894	0	13.5108	0.000632213	0	9.35087	0.000962586	23.0363	0.00597316	0	18.9437	0.0244048	0	24.6498	0.953456	0	-0.223646	0.00587414	0	0.151824
2726_Pica-1	Pica-1	2.02102e+07	2021-02-08 11:56:00	2020_02_08_bellows	2726	Carb	Pica	In house standard	Bel	3400	172.64	19.6942	3.83e-12	0.001	0	-0.84	FST	FALSE	C:\Nu Stable\Analyses\CLUMPED-SEQUENCES\Clumped NuCarb - Start.SEQ	4	20	20	7.97e-08	7.96e-08	3.55778	0.000540017	0	9.38174	0.00134615	40.5817	0	13.5137	0.000520233	0	9.34342	0.00134504	23.0089	0.00664345	1	18.6967	0.0223763	1	13.4898	0.821365	1	-0.243576	0.00657392	0	-0.0759384
2735_Pica-2	Pica-2	2.02102e+07	2021-02-09 06:04:00	2020_02_08_bellows	2735	Carb	Pica	In house standard	Bel	3700	177.98	20.7889	3.67e-12	0.001	0	-0.97	0	FALSE	C:\Nu Stable\Analyses\CLUMPED-SEQUENCES\Clumped NuCarb + auto refill - short.seq	4	20	20	7.96e-08	7.95e-08	3.45315	0.000492592	0	9.11602	0.000755978	40.3078	0	13.4057	0.000474136	0	9.07774	0.000755582	22.6256	0.005731	0	18.1319	0.0255573	0	12.4774	0.911381	0	-0.252047	0.00561904	0	-0.10394
2770_Pica-3	Pica-3	2.02102e+07	2021-02-12 01:26:00	2020_02_08_bellows	2770	Carb	Pica	In house standard	Bel	3300	127.87	25.8075	2.79e-12	0.001	0	-0.91	0	FALSE	C:\Nu Stable\Analyses\CLUMPED-SEQUENCES\Clumped NuCarb + auto refill - short.seq	4	20	20	5.65e-08	6.55e-08	3.45054	0.00185036	1	9.04535	0.00435384	40.2349	1	13.4008	0.0018908	1	9.00713	0.00435319	22.5684	0.00958259	3	18.1885	0.0362146	1	21.6298	1.28559	0	-0.22793	0.00741232	1	0.0835978
2786_Pica-4	Pica-4	2.02102e+07	2021-02-13 05:36:00	2020_02_08_bellows	2786	Carb	Pica	In house standard	Bel	3500	162.6	21.5252	3.46e-12	0.001	0	-1.2	0	FALSE	C:\Nu Stable\Analyses\CLUMPED-SEQUENCES\Clumped NuCarb.seq	4	20	20	7.83e-08	7.85e-08	3.42853	0.000468821	0	9.06002	0.000942702	40.2501	0	13.3805	0.000449969	0	9.02174	0.000941973	22.5724	0.00686639	0	18.1043	0.0226925	0	25.5527	1.03883	0	-0.223909	0.00690383	0	-0.0200813
2792_Pica-1	Pica-1	2.02102e+07	2021-02-14 12:00:00	2021_02_14_bellows	2792	Carb	Pica	In house standard	Bel	3900	138.37	28.1853	2.6e-12	0.001	0	-1.04	FST	FALSE	C:\Nu Stable\Analyses\CLUMPED-SEQUENCES\Clumped NuCarb - Start.SEQ	4	20	20	6.27e-08	6.3e-08	3.56334	0.000599221	2	9.31629	0.000990866	40.5143	2	13.5166	0.000579729	2	9.27804	0.000990389	22.9963	0.006543	2	18.5941	0.0287173	0	27.1083	0.983091	2	-0.200985	0.00658904	0	-0.0352187
2801_Pica-2	Pica-2	2.02102e+07	2021-02-15 05:19:00	2021_02_14_bellows	2801	Carb	Pica	In house standard	Bel	3500	164.73	21.2469	3.54e-12	0.001	0	-0.92	0	FALSE	C:\Nu Stable\Analyses\CLUMPED-SEQUENCES\Clumped NuCarb + auto refill - short.seq	4	20	20	7.94e-08	7.95e-08	3.51176	0.000460569	0	9.19824	0.000687278	40.3926	0	13.4639	0.000429849	0	9.16	0.000686389	22.7794	0.00634938	0	18.3768	0.0237184	0	18.1151	0.957861	0	-0.240984	0.00624211	0	-0.0264756
2820_Pica-1	Pica-1	2.02102e+07	2021-02-18 10:56:00	2021_02_18_bellows	2820	Carb	Pica	In house standard	Bel	3900	174.9	22.2985	3.39e-12	0.001	0	-0.51	FST	FALSE	C:\Nu Stable\Analyses\CLUMPED-SEQUENCES\Clumped NuCarb - Start.SEQ	4	20	20	7.96e-08	7.96e-08	3.4513	0.000471222	0	9.0065	0.00105717	40.1949	0	13.4001	0.000448025	0	8.96832	0.00105614	22.5328	0.00662213	0	17.9531	0.0252655	0	21.9609	0.913899	0	-0.230514	0.00649815	0	-0.0627104
2837_Pica-1	Pica-1	2.02102e+07	2021-02-21 12:35:00	2021_02_21_bellows	2837	Carb	Pica	In house standard	Bel	3600	178.04	20.2202	3.75e-12	0.001	0	-0.58	FST	FALSE	C:\Nu Stable\Analyses\CLUMPED-SEQUENCES\Clumped NuCarb - Start.SEQ	4	20	20	7.96e-08	7.95e-08	3.54679	0.000501534	0	9.41923	0.00136493	40.6204	0	13.5046	0.000485431	0	9.38084	0.00136382	23.0546	0.007013	0	18.8046	0.0220335	0	22.4077	0.98495	0	-0.228633	0.00664867	0	-0.0441373
2846_Pica-2	Pica-2	2.02102e+07	2021-02-22 05:12:00	2021_02_21_bellows	2846	Carb	Pica	In house standard	Bel	3900	182.19	21.4062	3.57e-12	0.0030643	0	-0.76	0	FALSE	C:\Nu Stable\Analyses\CLUMPED-SEQUENCES\Clumped NuCarb + auto refill - short.seq	4	20	20	7.95e-08	7.95e-08	3.41721	0.000434663	0	9.05133	0.00101938	40.2411	0	13.3695	0.000419274	0	9.01303	0.00101858	22.5253	0.00760025	0	18.059	0.0244026	0	17.2845	1.03997	0	-0.250253	0.00725846	0	-0.047322
2890_Pica-3	Pica-3	2.02102e+07	2021-02-25 17:24:00	2021_02_21_bellows	2890	Carb	Pica	In house standard	Bel	3900	169.37	23.0265	3.29e-12	0.0020908	0	-0.81	0	FALSE	C:\Nu Stable\Analyses\CLUMPED-SEQUENCES\Clumped NuCarb.seq	4	20	20	7.97e-08	7.97e-08	3.35058	0.000555829	0	8.69455	0.00130014	39.8733	0	13.2942	0.000540464	0	8.65648	0.00129918	22.1133	0.00702721	0	17.4081	0.02379	0	22.8405	0.981315	0	-0.22913	0.00665544	0	0.0199725
2907_Pica-4	Pica-4	2.02102e+07	2021-02-27 03:10:00	2021_02_21_bellows	2907	Carb	Pica	In house standard	Bel	3900	172.7	22.5825	3.34e-12	0.0022876	0	-0.32	0	FALSE	C:\Nu Stable\Analyses\CLUMPED-SEQUENCES\Clumped NuCarb.seq	4	20	20	7.97e-08	7.97e-08	3.32677	0.000453918	0	8.718	0.000907036	39.8975	0	13.2726	0.000433737	0	8.67985	0.000906236	22.111	0.00692837	1	17.4964	0.0231032	1	14.3941	1.01793	1	-0.232135	0.00676657	1	0.0603542
2908_Pica-1	Pica-1	2.02102e+07	2021-02-28 10:52:00	2021_02_28_bellows	2908	Carb	Pica	In house standard	Bel	3600	164.12	21.9352	3.42e-12	0.001	0	-0.9	FST	FALSE	C:\Nu Stable\Analyses\CLUMPED-SEQUENCES\Clumped NuCarb - Start.SEQ	4	20	20	7.92e-08	7.93e-08	3.45943	0.000505084	0	9.01706	0.00110847	40.2058	0	13.4082	0.000482312	0	8.97889	0.00110745	22.5648	0.00676025	1	18.1285	0.0256094	0	23.1479	1.02391	1	-0.215181	0.00703302	0	0.0885943
2934_Pica-2	Pica-2	2.02103e+07	2021-03-02 11:07:00	2021_02_28_bellows	2934	Carb	Pica	In house standard	Bel	3800	172.58	22.0188	3.43e-12	0.001	0	-1.04	0	FALSE	C:\Nu Stable\Analyses\CLUMPED-SEQUENCES\Clumped NuCarb.seq	4	20	20	7.97e-08	7.96e-08	3.46262	0.000473983	0	9.13025	0.00122459	40.3225	0	13.4151	0.000462344	0	9.09197	0.00122371	22.6636	0.00659727	0	18.2674	0.0225434	0	20.4911	1.06701	0	-0.238354	0.00628797	0	0.000892352
2941_2021_03_03_bellows 1	Pica-1	2.02103e+07	2021-03-03 14:11:00	2021_03_03_bellows	2941	NA	Pica	In house standard	Bel	3600	96.56	37.2825	1.76e-12	0.001	0	-33.94	FST	0	NA	4	20	20	3.68e-08	6.42e-08	3.72109	0.00112392	0	9.75625	0.00153084	40.9678	0	13.6808	0.00109528	0	9.71774	0.00152994	23.648	0.0084584	1	5.45243	0.358057	77	46.3072	8.28684	0	-0.14792	0.00842961	2	-13.7878
2946_Pica-1	Pica-1	2.02103e+07	2021-03-09 15:10:00	2021_03_09_bellows	2946	Carb	Pica	In house standard	Bel	4000	96.77	41.3351	1.63e-12	0.001	0	-0.75	FST	TRUE	C:\Nu Stable\Analyses\CLUMPED-SEQUENCES\Clumped NuCarb - Start.SEQ	4	20	20	3.82e-08	3.83e-08	3.57746	0.000609217	0	9.44816	0.00101176	40.6502	0	13.5346	0.000576617	0	9.40981	0.0010108	23.0694	0.00971721	1	18.5132	0.0338445	3	4.92063	1.86151	1	-0.275663	0.00963973	2	-0.387479
2951_Pica-2	Pica-2	20210310	2021-03-10 00:43:00	2021_03_09_bellows	2951	Carb	Pica	In house standard	Bel	3900	200.74	19.4281	3.89e-12	0.001	0	-0.34	0	TRUE	C:\Nu Stable\Analyses\CLUMPED-SEQUENCES\Clumped NuCarb + auto refill - short - 25nA.seq	4	20	20	7.96e-08	7.96e-08	3.52706	0.000477257	0	9.38346	0.000736695	40.5835	0	13.4847	0.000454945	0	9.34507	0.000736128	22.9301	0.00696091	0	18.6362	0.0249637	0	6.72675	0.91931	0	-0.295239	0.00664047	0	-0.138508
2955_Pica-2	Pica-2	2.02103e+07	2021-03-10 08:30:00	2021_03_09_bellows	2955	Carb	Pica	In house standard	Bel	3600	162.75	22.1198	3.3e-12	0.001	0	-0.39	0	TRUE	C:\Nu Stable\Analyses\CLUMPED-SEQUENCES\Clumped NuCarb.seq	4	20	20	7.52e-08	7.54e-08	3.55259	0.000422436	0	9.36495	0.000752996	40.5644	0	13.5082	0.000404064	0	9.32663	0.000752418	22.9471	0.00718073	0	18.5694	0.0239857	0	9.50502	0.980358	0	-0.284499	0.00700362	0	-0.167592
2961_Pica-3	Pica-3	2.02103e+07	2021-03-10 19:04:00	2021_03_09_bellows	2961	Carb	Pica	In house standard	Bel	4000	193.97	20.6217	3.62e-12	0.001	0	-0.24	0	TRUE	C:\Nu Stable\Analyses\CLUMPED-SEQUENCES\Clumped NuCarb.seq	4	20	20	7.96e-08	7.95e-08	3.54322	0.000540943	0	9.39201	0.00177464	40.5923	1	13.5003	0.000523856	0	9.35364	0.00177295	22.9759	0.00693592	0	18.6366	0.0247827	0	8.69846	0.933185	0	-0.275904	0.00641269	0	-0.157658
2971_Pica-4	Pica-4	2.02103e+07	2021-03-11 13:25:00	2021_03_09_bellows	2971	Carb	Pica	In house standard	Bel	3600	173.07	20.8008	3.53e-12	0.001	0	-0.42	0	TRUE	C:\Nu Stable\Analyses\CLUMPED-SEQUENCES\Clumped NuCarb.seq	4	20	20	7.97e-08	7.97e-08	3.55459	0.000529204	0	9.4273	0.00157045	40.6287	0	13.5123	0.000506443	0	9.38892	0.001569	23.0066	0.00613691	0	18.7928	0.0258178	0	3.38303	0.798732	0	-0.291118	0.00571708	0	-0.0717361
3004_Pica-1	Pica-1	2.02103e+07	2021-03-14 12:18:00	2021_03_14_bellows	3004	Carb	Pica	In house standard	Bel	3700	207.4	17.8399	4.27e-12	0.001	0	0.07	FST	FALSE	C:\Nu Stable\Analyses\CLUMPED-SEQUENCES\Clumped NuCarb - Start.SEQ	4	20	20	7.97e-08	7.96e-08	3.57148	0.000425728	0	9.48123	0.000860147	40.6843	0	13.5301	0.00040575	0	9.44283	0.000859394	23.1232	0.00589697	0	19.3147	0.0213411	0	28.648	0.90616	1	-0.247837	0.00581659	0	0.333667
3013_Pica-2	Pica-2	2.02103e+07	2021-03-15 04:54:00	2021_03_14_bellows	3013	Carb	Pica	In house standard	Bel	3900	141.6	27.5424	2.58e-12	0.001	0	0.01	0	FALSE	C:\Nu Stable\Analyses\CLUMPED-SEQUENCES\Clumped NuCarb.seq	4	20	20	6.21e-08	6.23e-08	3.64423	0.00049874	0	9.48712	0.000771266	40.6904	0	13.5989	0.000473076	0	9.44888	0.00077058	23.1741	0.00615801	0	18.9619	0.0247183	0	9.50563	1.14629	0	-0.274088	0.00587304	0	-0.0245195
3048_Pica-3	Pica-3	2.02103e+07	2021-03-17 22:01:00	2021_03_14_bellows	3048	Carb	Pica	In house standard	Bel	3500	172.55	20.284	3.63e-12	0.001	0	-0.24	0	FALSE	C:\Nu Stable\Analyses\CLUMPED-SEQUENCES\Clumped NuCarb + auto refill - short - 25nA.seq	4	20	20	7.97e-08	7.97e-08	3.57087	0.000467293	0	9.42604	0.000624769	40.6274	0	13.5276	0.000444194	0	9.3877	0.000624284	23.0365	0.00753477	0	18.7545	0.0220773	0	7.28747	0.981397	0	-0.276298	0.0073952	0	-0.1069
3073_Pica-4	Pica-4	2.02103e+07	2021-03-19 19:46:00	2021_03_14_bellows	3073	Carb	Pica	In house standard	Bel	3500	173.28	20.1985	3.65e-12	0.001	0	-0.28	0	FALSE	C:\Nu Stable\Analyses\CLUMPED-SEQUENCES\Clumped NuCarb.seq	4	20	20	7.97e-08	7.97e-08	3.54895	0.000439327	0	9.42356	0.00084641	40.6248	0	13.5068	0.000419445	0	9.38518	0.000845704	23.0113	0.00639199	0	18.793	0.0242873	0	12.501	1.03002	0	-0.277356	0.0063399	0	-0.0641063
3074_Pica-1	Pica-1	2.02103e+07	2021-03-21 11:31:00	2021_03_21_bellows	3074	Carb	Pica	In house standard	Bel	4000	178.86	22.3639	3.3e-12	0.0082418	0	-0.28	PumpOver	FALSE	C:\Nu Stable\Analyses\CLUMPED-SEQUENCES\Clumped NuCarb - Start.SEQ	4	20	20	7.97e-08	7.97e-08	3.5981	0.000621127	0	8.81163	0.00103711	39.994	0	13.5318	0.000603647	0	8.77396	0.00103666	22.4208	0.00698762	0	17.7922	0.0201018	0	10.1563	0.962686	0	-0.284799	0.00704966	0	0.164512
3092_Pica-2	Pica-2	2.02103e+07	2021-03-22 22:53:00	2021_03_21_bellows	3092	Carb	Pica	In house standard	Bel	3400	167.79	20.2634	3.61e-12	0.001	0	-0.01	0	FALSE	C:\Nu Stable\Analyses\CLUMPED-SEQUENCES\Clumped NuCarb.seq	4	20	20	7.83e-08	7.85e-08	3.59571	0.000486317	0	9.55433	0.000953089	40.7597	0	13.5555	0.000467036	0	9.51591	0.000952375	23.1982	0.00666129	0	19.0687	0.0243086	0	12.9626	0.939193	0	-0.271595	0.00652248	0	-0.052533
[truncated: 27 more columns]

## Sheet: Carbonate Stds (MAT253 v Nu)
TABLE S1g. CARBONATE STANDARD COMPARISON BY INSTRUMENT
All MAT253 sessions (see "MAT D47…" tab)						2021 Nu Perspective measurement session (see "Nu D47 Replicate…" tab)
CARRARA	d13C (PDB)	d18O_carb	BRD47rfac_P	TEMPERATURE		CARRARA	d13C (PDB)	d18O_carb	D47_ETH	TEMPERATURE
MEAN	1.88767	-2.27569	0.409471	242.091		MEAN	2.027	-2.1624	0.396746	254.962
SD	0.0633826	0.216592	0.0426793	64.856		SD	0.0513323	0.143444	0.015647	33.415
SE	0.0107136	0.0366107	0.00721412	10.9627		SE	0.0112016	0.031302	0.00341445	7.29175
SE 95%CI	0.0209987	0.071757	0.0141397	21.4868		SE 95%CI	0.0219552	0.061352	0.00669232	14.2918
N =	35					N =	21
OOIDS	d13C (PDB)	d18O_carb	BRD47rfac_P	TEMPERATURE		OOIDS	d13C (PDB)	d18O_carb	D47_ETH	TEMPERATURE
MEAN	4.72146	-0.0134098	0.682119	28.3133		MEAN	4.88487	0.104931	0.684166	26.945
SD	0.0866224	0.150082	0.0380243	14.5689		SD	0.0543075	0.159131	0.0228029	7.94014
SE	0.015815	0.0274011	0.00694226	2.6599		SE	0.0121435	0.0355829	0.00509887	1.77547
SE 95%CI	0.0309974	0.0537061	0.0136068	5.2134		SE 95%CI	0.0238013	0.0697424	0.00999379	3.47992
N =	30					N =	20
		Δ47 (BRD47_rfac_P)	95% conf. int. on SE of mean	Temp. (Petersen et al 2019 cal.)	95% conf. int. on SE of mean
MAT 253	Carrara	0.409471	0.0141397	242.091	21.4868
	Ooids	0.682119	0.0136068	28.3133	5.2134
Nu	Carrara	0.396746	0.00669232	254.962	14.2918
	Ooids	0.684166	0.00999379	26.945	3.47992

## Sheet: NAm Cretaceous D47 Compilation
TABLE S1h. Compilation of Late Cretaceous Marine D47 Data from North American Interior
Data source	Formation	Stage	N	Mean age	Age uncertainty	Mean temperature	±95% CI SE temperature	avg d18Ow	±95% CI d18Ow	Northern Latitude	Southern Latitude	Region	notes
Petersen et al. (2016)	Lance	Late Maastrichtian	5	67	1	22	2.2	-8.4	0.8	49	41	WIS	reprocessed data for freshwater runoff into WIS (group 2 of Petersen et al. 2016); Age range uncertain, assigned to 66-68 Ma
Petersen et al. (2016)	upper Fox Hills	Late Maastrichtian	7	67	1	14.5	4.5	-5.5	1.96	49	45	WIS	reprocessed estuarine WIS; Age range of Iron Lightning member of Fox Hills somewhat uncertain, thus assigned 66-68 Ma
Petersen et al. (2016)	lower Fox Hills	Late Maastrichtian	9	68.8	0.7	15.1	1.6	-3.4	1.2	47	39	WIS	reprocessed Shallow WIS; Age range of Trail City and Timber Lake members of Fox Hills Ss spans H. nicoletti to J. nebrascensis ammonite biozones (Landman and Waage, 1993, pgs. 16-17). Numerical ages for biozones from GTS 2020
Meyer et al. (2018)	Prairie Bluff	Early Maastrichtian to Late Maastrichtian	11	69.5	2.5	21.1	3.2	0.6	0.7	33	32	GoM	Specimens from Moscow Landing and Marengo County, Alabama. Age of Prairie Bluff Formation obtained from biostratigraphy described in Cobban and Kennedy (1995), placing base of formation within Globotruncana aegyptica zone (73-74 Ma GTS 2012) and top of formation in lower N. frequens nannofossil zone (~67 Ma, GTS 2012). Meyer et al 2018 data specimens reprocessed in O'Hora et al. (in review).
Meyer et al. (2018)	Demopolis	Late Campanian	4	73	1	24.5	7.3	0.1	1.6	33	32	GoM	Very large standard error on the mean. Excludes 1 specimen with less than 3 replicates.
Meyer et al. (2018)	Ripley Fm. Coon Creek Tongue	Late Campanian	9	73.6	1	23.4	2.2	0.8	0.4	35	32	GoM	Specimens from Coon Creek Tongue of Ripley Formation in McNairy County, Tennessee. Age ascertained from ammonite biostratigraphy of Cobban and Kennedy (1994). McNairy county biozones (N. hyatti and J. nodosus) correlate to Western Interior Basin ammonite biozones of B. compressus to B. jenseni, which spans 72.75-74.5 Ma (GTS2012). Ripley Fm. in Alabama yields a younger fauna, originally considere…
Gao et al. (2021)	Pierre Shale	Late Campanian	14	74.5	1	23	3.7	-0.5	0.9	45	43	WIS	standard error calculated using N = 14 (pg. 6 Gao et al)
Petersen et al. (2016)	Pierre Shale, Lewis Shale	Late Campanian	4	74.9	2.8	22.1	3.9	-0.7	0.8	39	36	WIS	reprocessed Deep WIS data; ages from ammonite biozones (B. eliasi, B. reesidei, E. jenneyi, B. reduncus) in GTS 2020
this study	Mancos Shale and equivalents	Late Cenomanian	5	94.05	0.45	31.1	3.7	-0.1	0.8	38	36	WIS	Zone 3; P. newberryi ranges from the upper Metoicoceras mosbyense to the Watinoceras devonense ammonite biozones (Kauffman et al., 1993, p. 429), corresponding to 94.5-93.6 Ma (Meyers et al., 2012; Jones et al., 2021)
this study	Frontier and lower Mancos Shale (and equivalents)	Middle to Late Cenomanian	5	95.2	0.6	30.8	4.7	-0.7	0.2	45	43	WIS	Zone 1; Pycnodonte kellumi zone (all P. aff P. kellumi species). Lithostratigraphic range = Dakota Sandstone (Paguate Sandstone Tongue through Twowells Sandstone members) from Hook & Cobban (1977). Biostratigraphic age range: ammonite biozone range A. amphibolum - upper Metiococeras mosbyense (Kauffman et al., 1993; Sealey and Lucas, 2003), corresponding to 95.8-94.6 Ma (GTS 2012).
Petersen et al. (2016) Reprocessed data summarized by paleoenvironment
Environment	N	d13Ccarb	SE d13Ccarb	d18Ocarb	SE d18Ocarb	D47 (rfac_P2019)	SE D47	avg T (Petersen et al. 2019)	SE_T	avg BRd18Ow	SE_dw	avg T (Anderson)	SE_T (Anderson)	avg d18Ow Anderson	SE dw Anderson
Freshwater (1)	1	-4.4	NA	-19.98	NA	0.698	0.012	22	NA	-19.9	NA	19.7	NA	-20.4	NA
Cement	3	-6.04	3.9	-8.83	0.28357	0.664	0.012	34.6	7.4	-4.7	1.1	31.8	7.1	-5.2	1.1
Freshwater (2)	5	-5	0.53	-8.46	0.3492	0.698	0.012	22	1.1	-8.4	0.4	19.8	1.1	-8.9	0.4
Estuarine	7	0.99	0.44	-4.19	0.80617	0.722	0.01	14.5	2.3	-5.5	1	12.6	2.2	-5.9	1
Shallow Marine WIS	9	0.49	0.37	-2.17	0.61928	0.719	0.009	15.1	0.8	-3.4	0.6	13.2	0.8	-3.8	0.6
Open Ocean Gulf	8	1.08	0.11	-1.3	0.26556	0.695	0.009	23.1	1.8	-0.2	0.6	20.9	1.7	-0.7	0.6
Deep Marine WIS	4	0.15	0.82	-1.19	0.43607	0.698	0.01	22.1	2	-0.7	0.4	19.9	1.9	-1.1	0.4
Petersen et al. (2016) Supplementary Table DR3: Reprocessed Stable and Clumped Isotope Sample Averages
Name	Formation	Environment	Min	N	avg BRd13C	SE d13C	avg BRd18Ocarb	SE d18Ocarb	avg D47_rfac_P	SE D47	avg T_uniBRP	SE_T	avg BRd18Ow	SE_dw	avg T (Anderson)	SE_T_Anderson	avg d18Ow Anderson	SE dw Anderson		Name	avg T	SE T	avg dw	SE dw		avg T	avg dw
A4716-unio	Hell Creek	Freshwater (1)	ar	5	-4.4	0.05	-19.98	0.12106	0.698	0.011	22	2.5	-19.9	0.6	19.7	2.4	-20.4	0.6		A4716-unio	12.9332	2.21902	-21.1198	0.559521		9.06676	1.21979
D5453-camp	Lance	Freshwater (2)	ar	4	-5.02	0.05	-9.04	0.11722	0.696	0.013	22.8	3.7	-8.8	0.9	20.6	3.5	-9.3	0.9		D5453-camp	12.5489	2.05002	-10.2687	0.499103		10.2511	1.46869
D5453-campB	Lance	Freshwater (2)	ar	3	-3.72	0.17	-9.18	0.06119	0.701	0.015	21.1	2.9	-9.3	0.6	19	2.8	-9.8	0.6		D5453-campB	12.0776	2.75529	-10.5194	0.583658		9.02243	1.2194
D5453-ples	Lance	Freshwater (2)	ar	3	-4.54	0.1	-8.05	0.17458	0.69	0.015	24.7	4.3	-7.4	1.1	22.3	4.1	-7.9	1		D5453-ples	13.9705	3.00808	-8.98088	0.814442		10.7295	1.58088
10022-unioA	Lance	Freshwater (2)	ar	3	-5.85	0.05	-7.89	0.06692	0.698	0.015	21.9	2.6	-7.9	0.6	19.6	2.5	-8.3	0.6		10022-unioA	16.2603	1.36588	-8.32509	0.355887		5.63974	0.42509
10022-unioB	Lance	Freshwater (2)	ar	4	-5.86	0.01	-8.12	0.11518	0.706	0.013	19.6	3.5	-8.6	0.7	17.4	3.3	-9.1	0.7		10022-unioB	15.2319	3.81083	-8.80122	0.794096		4.36807	0.201223
A668-cem	Hell Creek	Cement	cc	3	-12.34	0.08	-8.57	0.08192	0.686	0.015	25.9	0.7	-6	0.2	23.5	0.7	-6.5	0.2		A668-cem	23.3745	1.42623	-6.52689	0.326454		2.52552	0.526893
16002-ano	Fox Hills (upper)	Estuarine	ar	4	1.23	0.04	-5.85	0.12625	0.723	0.013	13.9	2.7	-7.5	0.6	12	2.6	-8	0.6		16002-ano	8.51348	1.45044	-7.97099	0.427544		5.38652	0.470992
16002-corbA	Fox Hills (upper)	Estuarine	ar	3	0.03	0.05	-5.01	0.04041	0.727	0.015	12.7	1.7	-6.9	0.4	10.8	1.6	-7.3	0.4		16002-corbA	6.81145	0.461195	-7.51518	0.145892		5.88855	0.61518
16002-corbB	Fox Hills (upper)	Estuarine	ar	3	1.48	0.02	-5.99	0.02603	0.727	0.015	12.6	3.2	-8	0.7	10.7	3	-8.4	0.6		16002-corbB	9.9498	3.27029	-7.80858	0.722666		2.6502	-0.19142
6113-Luna	Fox Hills (upper)	Estuarine	ar	5	0.93	0.09	-2.84	0.13105	0.724	0.011	13.9	4.1	-4.5	0.9	12	3.9	-4.9	0.9		6113-Luna	7.76487	3.51093	-5.17552	0.836101		6.13513	0.67552
6113-ost	Fox Hills (upper)	Estuarine	cc	4	0.51	0.11	-4.74	0.16085	0.732	0.013	11.1	2.4	-5.3	0.6	9.3	2.3	-5.7	0.6		6113-ost	7.35347	3.46309	-6.17561	0.846274		3.74653	0.875607
6113-Tamer	Fox Hills (upper)	Estuarine	ar	3	0.17	0.04	-1.82	0.16905	0.727	0.015	12.8	3.8	-3.7	0.9	11	3.7	-4.1	0.9		6113-Tamer	5.80243	3.70815	-4.58501	0.962267		6.99757	0.88501
16216-biv	Fox Hills (upper)	Estuarine	ar	5	2.57	0.05	-3.1	0.05644	0.691	0.011	24.7	3.7	-2.5	0.8	22.3	3.5	-3	0.8		16216-biv	15.8536	3.47305	-3.65059	0.772709		8.84638	1.15059
A120-cymb	Fox Hills, Timber Lake	Shallow Marine WIS	ar	3	-0.7	0.01	-0.9	0.02333	0.723	0.015	13.9	1.2	-2.6	0.3	12.1	1.1	-3	0.3		A120-cymb	9.35409	1.22398	-2.84203	0.29437		4.54591	0.242026
A120-C1-cuc	Fox Hills, Timber Lake	Shallow Marine WIS	ar	3	1.34	0.02	-2.35	0.05859	0.73	0.015	11.7	1.2	-4.5	0.3	9.9	1.2	-4.9	0.3		A120-C1-cuc	4.86394	2.01315	-5.31449	0.515939		6.83606	0.814494
SB1-crass	Fox Hills, Timber Lake	Shallow Marine WIS	cc	3	0.9	0.04	-3.22	0.06642	0.709	0.015	18.3	1.8	-2.2	0.5	16.3	1.7	-2.6	0.4		SB1-crass	12.136	2.27291	-3.5626	0.545099		6.16403	1.3626
A131-Tamer	Fox Hills, Timber Lake	Shallow Marine WIS	ar	4	0.3	0.05	-1.77	0.1255	0.715	0.013	16.6	3.2	-2.9	0.8	14.6	3.1	-3.3	0.8		A131-Tamer	11.1379	3.6671	-3.34508	0.900523		5.46208	0.445084
A500-dos	Fox Hills, Timber Lake	Shallow Marine WIS	ar	3	-0.33	0.06	-0.85	0.04631	0.719	0.015	15.3	1.7	-2.2	0.4	13.3	1.6	-2.6	0.4		A500-dos	13.4507	1.80629	-1.88816	0.39177		1.84927	-0.311844
A500-fc	Fox Hills, Timber Lake	Cement	cc	4	1.09	0.04	-8.53	0.12288	0.679	0.013	28.5	3.5	-5.5	0.8	26	3.4	-6	0.8		A500-fc	21.5294	3.26832	-6.88507	0.761692		6.97058	1.38507
D7409-cymb	Fox Hills (lower)	Shallow Marine WIS	ar	4	-0.34	0.03	-4.06	0.08538	0.716	0.013	16.4	3.2	-5.2	0.8	14.3	3	-5.6	0.7		D7409-cymb	7.73782	2.39606	-6.36864	0.596272		8.66218	1.16864
D7904-tamer	Fox Hills (lower)	Shallow Marine WIS	ar	4	1.04	0.08	-4.3	0.14652	0.72	0.013	14.9	2.7	-5.8	0.4	13	2.6	-6.2	0.4		D7904-tamer	5.1767	3.42555	-7.20583	0.664892		9.7233	1.40583
A4654-biv	Fox Hills, Trail City Mbr.	Shallow Marine WIS	ar	3	1.74	0.06	-1.24	0.06429	0.721	0.015	14.4	1.5	-2.8	0.4	12.5	1.4	-3.2	0.3		A4654-biv	5.64759	1.42481	-4.01937	0.36485		8.75241	1.21937
A4654-gas	Fox Hills, Trail City Mbr.	Shallow Marine WIS	ar	3	0.5	0.03	-0.86	0.04333	0.721	0.015	14.5	1.7	-2.4	0.4	12.6	1.7	-2.8	0.4		A4654-gas	6.23592	1.61461	-3.50542	0.375845		8.26408	1.10542
D4153-ost	Lewis Shale	Deep Marine WIS	cc	3	2.36	0.06	-2.48	0.07937	0.684	0.015	26.7	2	0.3	0.5	24.3	1.9	-0.2	0.5		D4153-ost	20.6715	2.00819	-0.988237	0.490124		6.02851	1.28824
ChurchAR-biv	Pierre Shale	Deep Marine WIS	ar	3	-1.56	0.02	-0.86	0.01856	0.692	0.015	24	1.1	-0.4	0.2	21.7	1.1	-0.9	0.2		ChurchAR-biv	15.8273	1.11863	-1.38704	0.256281		8.1727	0.987042
BCL-biv	Pierre Shale	Deep Marine WIS	ar	3	-0.27	0.04	-0.58	0.03528	0.706	0.015	19.5	2.8	-1.1	0.6	17.4	2.7	-1.5	0.6		BCL-biv	11.2045	2.64299	-2.12423	0.606763		8.29555	1.02423
Cen1405-blue	Pierre Shale	Deep Marine WIS	ar	3	0.06	0.16	-0.82	0.19502	0.709	0.015	18.3	3.1	-1.5	0.8	16.3	3	-2	0.8		Cen1405-blue	10.0852	3.00013	-2.61243	0.816178		8.21482	1.11243
Cen1504-cem	Pierre Shale	Cement	cc	4	-6.88	0.03	-9.4	0.04973	0.627	0.013	49.3	3.5	-2.5	0.7	45.8	3.3	-3.1	0.6		Cen1504-cem	43.2808	3.46852	-3.57208	0.672341		6.01916	1.07208
MC-PRB-EXOa	Prairie Bluff	Open Ocean Gulf	cc	4	0.91	0.01	-1.4	0.0477	0.681	0.013	27.9	1.4	1.6	0.3	25.5	1.3	1.1	0.3		MC-PRB-EXOa	22.1901	1.78589	0.412529	0.39371		5.70991	1.18747
MC-PRB-EXOb	Prairie Bluff	Open Ocean Gulf	cc	4	1.11	0.03	-1.38	0.03884	0.68	0.013	28.1	1.2	1.6	0.2	25.7	1.2	1.1	0.2		MC-PRB-EXOb	22.8748	1.27834	0.576768	0.257744		5.22515	1.02323
CC-RIP-CRAa	Ripley	Open Ocean Gulf	ar	3	1.21	0.03	-1.01	0.04163	0.691	0.015	24.4	1.9	-0.4	0.4	22.1	1.8	-1	0.3		CC-RIP-CRAa	19.1706	1.97692	-0.83357	0.377782		5.22941	0.43357
CC-RIP-CUCaU	Ripley	Open Ocean Gulf	ar	4	1.21	0.03	-0.52	0.0606	0.701	0.013	21.1	3.8	-0.6	0.8	19	3.6	-1.1	0.8		CC-RIP-CUCaU	14.6487	3.80232	-1.33691	0.835677		6.45131	0.736909
CC-RIP-CUCaV	Ripley	Open Ocean Gulf	ar	3	0.99	0.07	-1.13	0.06888	0.698	0.015	21.9	2.2	-1.1	0.5	19.7	2.1	-1.6	0.5		CC-RIP-CUCaV	15.7051	1.39896	-1.68086	0.364015		6.19486	0.580859
CC-RIP-TURa	Ripley	Open Ocean Gulf	ar	3	1.54	0.06	-0.76	0.05175	0.702	0.015	20.6	0.2	-1	0.1	18.4	0.2	-1.5	0.1		CC-RIP-TURa	13.068	0.558155	-1.88029	0.154756		7.53204	0.880293
OC-RIP-EXOa	Ripley	Open Ocean Gulf	cc	3	0.89	0.1	-1.88	0.226	0.69	0.015	24.6	3.5	0.4	0.9	22.3	3.4	-0.1	0.9		OC-RIP-EXOa	19.1818	3.68847	-0.717663	1.01113		5.4182	1.11766
OC-RIP-EXOb	Ripley	Open Ocean Gulf	cc	2	0.78	0.09	-2.35	0.105	0.716	0.018	16	1.8	-1.8	0.5	14.1	1.8	-2.3	0.5		OC-RIP-EXOb	10.3014	1.92367	-3.09395	0.534692		5.69859	1.29395
Bad Samples**	**stable isotopes usable, but clumped isotope temperature, d18Ow eliminated from further analysis																								mean change:	6.55876	0.883733
Name	Formation	Environment	Min	N	avg BRd13C	SE d13C	avg BRd18Ocarb	SE d18Ocarb	avg D47_rfac_P	SE D47	avg T_uniBRP	SE_T	avg BRd18Ow	SE_dw	avg T (Anderson)	SE_T_Anderson	avg d18Ow Anderson	SE dw Anderson							sd:	2.12291	0.451462
D4579-ost	Lewis Shale	Shallow Marine WIS	cc	3	1.83	0.07	-4.69	0.16093	0.671	0.015	31.4	1.6	-1.1	0.2	28.8	1.6	-1.6	0.2
9875-ost	Horsetheif Sandstone	Shallow Marine WIS	cc	2	3.08	0.06	-7.87	0.085	0.666	0.018	33.5	2.2	-3.8	0.4	30.7	2.1	-4.3	0.4
PS1an-inocer	Pierre Shale	Deep Marine WIS	ar	1	3.48	NA	-1.94	NA	0.71	0.026	17.8	NA	-2.8	NA	15.8	NA	-3.2	NA
SE = standard error, SE on d18Ow is calculated by first calculating d18Ow for each replicate then taking the SE of all replicates.
Meyer et al. (2018) Reprocessed Clumped Isotope Data Demopolis Formation (from O'Hora et al. in revision)
Name	d13C	d18O	d45	d46	d47	d48	d49	D47	D48	D49		SlopeEGL	SlopeETF	IntETF	AcidFF	D47rfac			hgint	egint	SlopeP	IntP	newAFF	BRD47rfac_P	Brand_Temp	Avg. T	SE T		BRd18O(SMOW)_alpha	BRd18O(PDB)_alpha	T47 alpha	dw	Avg d18Ow	SE d18Ow	Notes
SA-DEM-OSTa	1.75266	37.5382	5.1895	2.48076	7.56862	4.62624	10.4586	-0.235948	-0.339726	0.0190514		0.0161988	1.06686	0.985783	0.067	0.670258			-0.899067	-0.0567857	1.06045	0.980019	0.072	0.671792	31.0842				29.1792	-1.67886	1.02721	1.91993
SA-DEM-OSTa	1.90857	37.8539	5.34628	2.78577	8.02263	5.04412	8.30902	-0.245428	-0.532186	-2.8705		0.0179228	1.05768	0.995859	0.067	0.651192			-0.9164	-0.0668052	1.05133	0.990034	0.072	0.652841	38.3	34.6921	3.60788		29.4924	-1.37514	1.0258	3.60178	2.76086	0.840927	not included in formation average because N < 3
SA-DEM-ANOa	1.54177	36.7166	4.96422	1.68725	6.54083	2.86334	6.15081	-0.246758	-0.512242	-2.45536		0.0161988	1.06686	0.985783	0.067	0.676487			-0.899067	-0.0567857	1.06045	0.980019	0.072	0.677985	28.8332				28.3642	-2.46943	1.02766	0.684343
SA-DEM-ANOa	1.66188	36.8146	5.08014	1.78206	6.75435	3.26448	8.63211	-0.24669	-0.30172	-0.304148		0.0161988	1.06686	0.985783	0.067	0.67287			-0.899067	-0.0567857	1.06045	0.980019	0.072	0.674389	30.1341				28.4614	-2.37516	1.0274	1.03525
SA-DEM-ANOa	1.78344	36.9304	5.198	1.89412	6.97432	3.13836	8.1519	-0.259152	-0.650973	-1.12456		0.0179228	1.05768	0.995859	0.067	0.656549			-0.9164	-0.0668052	1.05133	0.990034	0.072	0.658166	36.2209				28.5763	-2.26372	1.0262	2.31874
SA-DEM-ANOa	1.97147	37.3545	5.38854	2.3039	7.58231	4.29347	5.87646	-0.25313	-0.318133	-4.38067		0.0179228	1.05768	0.995859	0.067	0.651393			-0.9164	-0.0668052	1.05133	0.990034	0.072	0.653041	38.2211	33.3523	2.28607		28.997	-1.85563	1.02581	3.10419	1.78563	0.562636
SA-DEM-EXOa	1.13171	36.8596	4.58448	1.82436	6.25892	3.65822	9.70918	-0.271542	0.00616807	1.20649		0.0161988	1.06686	0.985783	0.067	0.654918			-0.899067	-0.0567857	1.06045	0.980019	0.072	0.656545	36.8492				28.506	-2.33188	1.02608	2.36866
SA-DEM-EXOa	1.3179	36.7977	4.757	1.76502	6.46078	3.2896	6.72527	-0.189901	-0.242672	-1.81877		0.0161988	1.06686	0.985783	0.067	0.738529			-0.899067	-0.0567857	1.06045	0.980019	0.072	0.739654	8.83886				28.4447	-2.39143	1.03202	-3.46506
SA-DEM-EXOa	1.42604	36.9493	4.86349	1.91157	6.64616	4.3623	4.31242	-0.258857	0.533498	-4.60975		0.0161988	1.06686	0.985783	0.067	0.661759			-0.899067	-0.0567857	1.06045	0.980019	0.072	0.663345	34.2381				28.595	-2.24557	1.02658	1.96024
SA-DEM-EXOa	1.51243	37.137	4.95079	2.09298	6.93276	3.76682	11.0667	-0.241822	-0.421728	1.63532		0.0161988	1.06686	0.985783	0.067	0.67498			-0.899067	-0.0567857	1.06045	0.980019	0.072	0.676486	29.3734	27.3249	6.3537		28.7813	-2.06491	1.02755	1.19687	0.515178	1.34878	relatively large standard error
SC-DEM-ANOa	2.41058	37.8444	5.81671	2.77767	8.62393	3.69047	2.0644	-0.12378	-1.8623	-9.52402		0.0258364	1.07263	0.986761	0.067	0.681997			-0.895146	-0.0573925	1.06618	0.980991	0.072	0.683461	26.8834				29.4829	-1.38427	1.02806	1.38432
SC-DEM-ANOa	2.35052	37.8468	5.76047	2.77985	8.58284	2.06958	7.06668	-0.10897	-3.47843	-4.52453		0.0258364	1.07263	0.986761	0.067	0.699021			-0.895146	-0.0573925	1.06618	0.980991	0.072	0.700383	21.0889				29.4853	-1.38197	1.02928	0.202262
SC-DEM-ANOa	2.43477	37.9052	5.84143	2.83636	8.74071	2.79899	5.55889	-0.0909094	-2.86545	-6.21026		0.0258364	1.07263	0.986761	0.067	0.714019			-0.895146	-0.0573925	1.06618	0.980991	0.072	0.715291	16.2532	21.4085	3.07282		29.5432	-1.32582	1.03033	-0.765127	0.273817	0.621522
SC-DEM-EXOb	1.51061	36.8411	4.93917	1.80731	6.74081	0.661962	6.18059	-0.140238	-2.94524	-2.63426		0.0270537	1.05603	0.987256	0.067	0.713579			-0.909686	-0.0587639	1.04968	0.981484	0.072	0.714853	16.3918				28.4877	-2.34968	1.0303	-1.7598
SC-DEM-EXOb	1.31847	36.3754	4.74339	1.35743	6.07559	-0.724869	5.79146	-0.158602	-3.43222	-1.93241		0.0270537	1.05603	0.987256	0.067	0.713191			-0.909686	-0.0587639	1.04968	0.981484	0.072	0.714467	16.514				28.0258	-2.79774	1.03027	-2.1819
SC-DEM-EXOb	1.42245	36.6108	4.84879	1.58486	6.40943	0.781629	6.55194	-0.158326	-2.38302	-1.73499		0.0270537	1.05603	0.987256	0.067	0.703945			-0.909686	-0.0587639	1.04968	0.981484	0.072	0.705277	19.4746				28.2593	-2.57124	1.02963	-1.32654
SC-DEM-EXOb	1.50635	36.738	4.93173	1.70785	6.64721	-0.319929	7.077	-0.12796	-3.72578	-1.54306		0.0270537	1.05603	0.987256	0.067	0.729219			-0.909686	-0.0587639	1.04968	0.981484	0.072	0.730399	11.5877	15.992	1.63195		28.3855	-2.44882	1.03138	-2.90712	-2.04384	0.33659
																										Sumter County/Safford, Demopolis Formation average
																										mean	24.5194						mean d18Ow	0.132696
																										±95% Confidence interval SE	7.33987						±95% Confidence interval SE	1.56347
Meyer et al. (2018) Reprocessed Clumped Isotope Data Prairie Bluff Formation (from O'Hora et al. in revision)
Name	d13C	d18O	d45	d46	d47	d48	d49	D47	D48	D49		SlopeEGL	SlopeETF	IntETF	AcidFF	D47rfac			hgint	egint	SlopeP	IntP	newAFF	BRD47rfac_P	Brand_Temp	Avg. T	SE T		BRd18O(SMOW)_alpha	BRd18O(PDB)_alpha	T47 alpha	dw	Avg d18Ow	SE d18Ow	Notes
MC-PRB-EXOa	0.888046	37.9433	4.39229	2.86992	7.1966	10.4722	2.74594	-0.168325	4.69715	-7.5318		0.0270537	1.05603	0.987256	0.067	0.670897			-0.909686	-0.0587639	1.04968	0.981484	0.072	0.672427	30.8511				29.581	-1.28911	1.02725	2.26553
MC-PRB-EXOa	0.886796	37.7061	4.38317	2.64093	6.96796	6.35428	8.02975	-0.16148	1.05978	-1.84468		0.0270537	1.05603	0.987256	0.067	0.684657			-0.909686	-0.0587639	1.04968	0.981484	0.072	0.686105	25.9553				29.3457	-1.51737	1.02825	1.06417
MC-PRB-EXOa	0.937093	37.8263	4.43436	2.75711	7.12913	6.52658	7.24752	-0.16793	0.999178	-2.90046		0.0270537	1.05603	0.987256	0.067	0.673241			-0.909686	-0.0587639	1.04968	0.981484	0.072	0.674758	30				29.465	-1.40167	1.02742	1.98571
MC-PRB-EXOa	0.925277	37.8542	4.42422	2.78401	7.03945	6.05137	13.6627	-0.272907	0.472985	3.40801		0.0193967	1.05092	1.04951	0.067	0.686214			-0.973352	-0.118287	1.0446	1.04336	0.072	0.687652	25.4163	28.0557	1.38361		29.4927	-1.37483	1.02836	1.09813	1.60339	0.306952
MC-PRB-EXOb	1.16913	37.9488	4.65605	2.87577	7.49358	8.78503	5.67018	-0.150144	3.00785	-4.92743		0.0270537	1.05603	0.987256	0.067	0.681612			-0.909686	-0.0587639	1.04968	0.981484	0.072	0.683078	27.0184				29.5865	-1.28387	1.02803	1.51207
MC-PRB-EXOb	1.07754	37.8605	4.56721	2.7904	7.29985	11.4994	3.67716	-0.167519	5.8779	-6.63971		0.0270537	1.05603	0.987256	0.067	0.668798			-0.909686	-0.0587639	1.04968	0.981484	0.072	0.670342	31.619				29.4989	-1.36877	1.0271	2.33536
MC-PRB-EXOb	1.14364	37.8449	4.62867	2.77548	7.36585	5.82574	5.49888	-0.150479	0.265575	-4.87246		0.0270537	1.05603	0.987256	0.067	0.684907			-0.909686	-0.0587639	1.04968	0.981484	0.072	0.686353	25.8686				29.4834	-1.38379	1.02827	1.1806
MC-PRB-EXOb	1.04792	37.7571	4.53597	2.69054	7.17356	6.24259	6.92187	-0.162906	0.849606	-3.20028		0.0270537	1.05603	0.987256	0.067	0.677277			-0.909686	-0.0587639	1.04968	0.981484	0.072	0.67877	28.5512	28.2643	1.24592		29.3964	-1.46826	1.02772	1.63279	1.6652	0.242975
																										mean	28.16	Prairie Bluff Chalk, MC locality, published in Petersen et al. 2016					mean	1.63429
																										±95% confidence interval SE	0.204467						±95% confidence interval SE	0.0605822
																										N	2						N	2
ML-PRB-EXOa	1.4432	38.1791	4.92077	3.09865	7.87507	6.23593	7.7254	-0.261808	0.0288408	-3.60897		0.0188452	1.02316	1.00469	0.067	0.651978			-0.955954	-0.0776937	1.01701	0.998815	0.072	0.653622	37.9923				29.8149	-1.06226	1.02586	3.85874
ML-PRB-EXOa	1.45789	38.4148	4.94244	3.32621	8.17235	7.78567	8.02295	-0.212149	1.11478	-3.78181		0.0211545	1.08573	1.03846	0.067	0.687427			-0.931972	-0.104322	1.0792	1.03238	0.072	0.688858	24.9982				30.0487	-0.835461	1.02845	1.55402
ML-PRB-EXOa	1.44898	38.382	4.93298	3.29459	8.18515	8.43771	-0.905343	-0.158784	1.82561	-12.5345		0.0211545	1.08573	1.03846	0.067	0.745073			-0.931972	-0.104322	1.0792	1.03238	0.072	0.746158	6.95378				30.0162	-0.866957	1.03246	-2.37161
ML-PRB-EXOa	1.52103	38.1513	4.99283	3.07201	7.98665	6.00859	4.98837	-0.198974	-0.144005	-6.33924		0.021948	1.04903	1.04695	0.067	0.721339			-0.972667	-0.116062	1.04272	1.04082	0.072	0.722567	13.9779	20.9805	6.7782		29.7873	-1.08899	1.03084	-1.02147	0.504918	1.38302	large standard error
ML-PRB-EXOb	0.0716859	38.7866	3.65499	3.68216	7.16668	6.44594	11.2858	-0.23635	-0.92509	0.111883		0.0223663	1.04201	1.05555	0.067	0.709246			-0.987466	-0.125097	1.03575	1.04937	0.072	0.710547	17.7661				30.4175	-0.477713	1.03	0.407524
ML-PRB-EXOb	0.24222	39.1788	3.82803	4.0611	7.7043	6.95815	17.6243	-0.251675	-1.17098	5.44941		0.0223663	1.04201	1.05555	0.067	0.680748			-0.987466	-0.125097	1.03575	1.04937	0.072	0.68222	27.322				30.8066	-0.100327	1.02797	2.75979
ML-PRB-EXOb	0.108772	38.8436	3.69168	3.73731	7.23736	6.85619	9.57422	-0.257902	-0.627681	-1.72749		0.0233427	1.07113	1.03607	0.067	0.645862			-0.942428	-0.103504	1.0647	1.03	0.072	0.647544	40.4105	28.4995	6.56334		30.4741	-0.422811	1.0254	4.95035	2.70589	1.31168	large standard error
ML-PRB-EXOc	0.691339	38.5619	4.22854	3.46659	7.57352	8.80549	-4.72072	-0.210719	1.84737	-15.9016		0.021948	1.04903	1.04695	0.067	0.71853			-0.972667	-0.116062	1.04272	1.04082	0.072	0.719774	14.8447				30.1946	-0.693904	1.03065	-0.437465
ML-PRB-EXOc	0.55413	38.8233	4.10862	3.71865	7.67149	7.69124	7.6745	-0.237205	0.238319	-4.01052		0.021948	1.04903	1.04695	0.067	0.688489			-0.972667	-0.116062	1.04272	1.04082	0.072	0.689914	24.6334				30.454	-0.44235	1.02853	1.87385
ML-PRB-EXOc	0.511531	38.7447	4.06604	3.64265	7.57431	6.5449	8.85816	-0.215467	-0.748216	-2.64713		0.0224474	1.03799	1.05057	0.067	0.717436			-0.986493	-0.120783	1.03175	1.04442	0.072	0.718687	15.1843				30.376	-0.518019	1.03057	-0.187819
ML-PRB-EXOc	0.468395	38.7547	4.02593	3.65223	7.55132	8.02481	6.74695	-0.206443	0.701877	-4.71051		0.0224474	1.03799	1.05057	0.067	0.727339			-0.986493	-0.120783	1.03175	1.04442	0.072	0.72853	12.1525				30.3859	-0.508383	1.03125	-0.842333
ML-PRB-EXOc	0.544876	39.126	4.11008	4.01081	7.92414	8.48432	11.8961	-0.274133	0.443068	-0.411229		0.0193967	1.05092	1.04951	0.067	0.666891			-0.973352	-0.118287	1.0446	1.04336	0.072	0.668446	32.3219	19.8274	3.77161		30.7542	-0.151087	1.02696	3.69419	0.820085	0.858249
ML-PRB-EXOd	0.719902	38.5509	4.25496	3.45606	7.58199	6.5941	7.25194	-0.219131	-0.327698	-4.07085		0.0224474	1.03799	1.05057	0.067	0.713454			-0.986493	-0.120783	1.03175	1.04442	0.072	0.714729	16.4311				30.1838	-0.704467	1.03029	-0.105157
ML-PRB-EXOd	0.744382	38.6099	4.27988	3.51302	7.65741	7.15797	7.3119	-0.225698	0.118735	-4.14897		0.0224474	1.03799	1.05057	0.067	0.704881			-0.986493	-0.120783	1.03175	1.04442	0.072	0.706207	19.171				30.2422	-0.647735	1.02969	0.535329
ML-PRB-EXOd	0.881293	38.9216	4.4187	3.81419	8.10892	6.89885	9.27395	-0.215329	-0.738416	-2.94432		0.0224474	1.03799	1.05057	0.067	0.705122			-0.986493	-0.120783	1.03175	1.04442	0.072	0.706447	19.0927				30.5514	-0.3478	1.02971	0.819088
ML-PRB-EXOd	0.372164	38.5414	3.92855	3.44613	7.16537	6.98444	13.2667	-0.287583	0.0797717	2.24291		0.0193967	1.05092	1.04951	0.067	0.668224			-0.973352	-0.118287	1.0446	1.04336	0.072	0.669771	31.8302	21.6313	3.45878		30.1743	-0.713626	1.02706	3.03403	1.07082	0.682352
ML-PRB-EXOe	0.174454	39.0247	3.75933	3.91221	7.50429	7.88001	6.41318	-0.23376	0.0399438	-5.2653		0.0188452	1.02316	1.00469	0.067	0.687824			-0.955954	-0.0776937	1.01701	0.998815	0.072	0.689253	24.8616				30.6537	-0.248604	1.02848	2.1145
ML-PRB-EXOe	0.165255	38.8381	3.74446	3.73213	7.32512	8.7468	7.39128	-0.219963	1.25922	-3.9317		0.0211545	1.08573	1.03846	0.067	0.698403			-0.931972	-0.104322	1.0792	1.03238	0.072	0.699768	21.2935				30.4687	-0.4281	1.02923	1.20028
ML-PRB-EXOe	0.12928	38.8815	3.71217	3.7739	7.35548	7.22789	8.04815	-0.197559	-0.331703	-3.32956		0.021948	1.04903	1.04695	0.067	0.737355			-0.972667	-0.116062	1.04272	1.04082	0.072	0.738487	9.18111				30.5117	-0.386383	1.03194	-1.38478
ML-PRB-EXOe	0.183965	39.019	3.76806	3.90672	7.54168	8.7487	7.22913	-0.200257	0.91283	-4.45731		0.021948	1.04903	1.04695	0.067	0.730238			-0.972667	-0.116062	1.04272	1.04082	0.072	0.731412	11.2827	16.6547	3.80333		30.6481	-0.254093	1.03145	-0.781238	0.287191	0.822081
ML-PRB-EXOf	1.43252	37.4232	4.88544	2.36908	7.16552	6.31525	7.7788	-0.214453	1.56405	-2.09306		0.0188452	1.02316	1.00469	0.067	0.714111			-0.955954	-0.0776937	1.01701	0.998815	0.072	0.715382	16.2243				29.0652	-1.78952	1.03034	-1.2353
ML-PRB-EXOf	1.47875	37.4082	4.92829	2.35471	7.16317	5.97355	8.28139	-0.246681	1.25263	-1.61264		0.0211545	1.08573	1.03846	0.067	0.673114			-0.931972	-0.104322	1.0792	1.03238	0.072	0.674631	30.046				29.0503	-1.80394	1.02742	1.59113
ML-PRB-EXOf	1.45303	37.4008	4.90392	2.34742	7.13508	5.56446	7.44714	-0.242404	0.860061	-2.39868		0.0211545	1.08573	1.03846	0.067	0.678402			-0.931972	-0.104322	1.0792	1.03238	0.072	0.679888	28.1512				29.0429	-1.81115	1.0278	1.2094
ML-PRB-EXOf	1.4234	37.3887	4.87574	2.33576	7.12712	4.92951	8.01266	-0.209941	0.251364	-1.78604		0.021948	1.04903	1.04695	0.067	0.729624			-0.972667	-0.116062	1.04272	1.04082	0.072	0.730801	11.4665	21.472	4.52563		29.0309	-1.82272	1.03141	-2.30821	-0.185747	0.944728
ML-PRB-EXOg	0.982215	38.2478	4.49079	3.16403	7.54712	7.32639	7.39306	-0.209815	0.982122	-3.61082		0.0188452	1.02316	1.00469	0.067	0.711498			-0.955954	-0.0776937	1.01701	0.998815	0.072	0.712785	17.0494				29.8831	-0.996122	1.03016	-0.26438
ML-PRB-EXOg	1.04168	38.2702	4.54731	3.18579	7.63641	8.27503	7.48134	-0.200577	1.88124	-3.62568		0.0211545	1.08573	1.03846	0.067	0.712301			-0.931972	-0.104322	1.0792	1.03238	0.072	0.713583	16.795				29.9053	-0.974556	1.03021	-0.297284
ML-PRB-EXOg	0.93237	38.1387	4.44039	3.05861	7.38354	8.9539	8.53043	-0.217109	2.81005	-2.22649		0.0211545	1.08573	1.03846	0.067	0.70016			-0.931972	-0.104322	1.0792	1.03238	0.072	0.701515	20.7133	18.1859	1.26585		29.7749	-1.10111	1.02936	0.405225	-0.0521465	0.228883
ML-PRB-EXOh	0.425957	38.7967	3.98754	3.69266	7.52702	8.67854	4.83074	-0.230707	1.27011	-6.64303		0.021948	1.04903	1.04695	0.067	0.698633			-0.972667	-0.116062	1.04272	1.04082	0.072	0.699997	21.2175				30.4275	-0.467994	1.02925	1.14449
ML-PRB-EXOh	0.447216	38.1486	3.98578	3.06716	6.9349	7.03423	7.48508	-0.203883	0.885092	-2.79636		0.0224474	1.03799	1.05057	0.067	0.744358			-0.986493	-0.120783	1.03175	1.04442	0.072	0.745448	7.15791				29.7847	-1.09157	1.03242	-2.54913
ML-PRB-EXOh	0.584996	38.3717	4.12245	3.28276	7.28966	8.2587	8.90383	-0.203362	1.67136	-1.95854		0.0224474	1.03799	1.05057	0.067	0.736633			-0.986493	-0.120783	1.03175	1.04442	0.072	0.737769	9.3922	12.5892	4.36209		30.006	-0.876934	1.03189	-1.82722	-1.07729	1.13026
ML-PRB-EXOi	1.79322	37.6333	5.23072	2.57262	7.74094	7.8648	6.54703	-0.197339	2.69907	-4.07507		0.0188452	1.02316	1.00469	0.067	0.720526			-0.955954	-0.0776937	1.01701	0.998815	0.072	0.721759	14.2278				29.2736	-1.58737	1.03078	-1.46536
ML-PRB-EXOi	1.75095	37.6815	5.19269	2.619	7.75007	3.71028	6.72098	-0.194727	-1.52665	-3.95328		0.0211545	1.08573	1.03846	0.067	0.716042			-0.931972	-0.104322	1.0792	1.03238	0.072	0.717301	15.619				29.3213	-1.54106	1.03047	-1.11717					all Prairie Bluff Formation analyses
ML-PRB-EXOi	1.76387	37.7389	5.20673	2.67448	7.80018	5.98709	8.30074	-0.213816	0.627576	-2.51356		0.021948	1.04903	1.04695	0.067	0.710063			-0.972667	-0.116062	1.04272	1.04082	0.072	0.711358	17.5056	15.7841	0.94982		29.3783	-1.48577	1.03005	-0.656926	-1.07982	0.23412					TEMP	dw
																										mean	19.5138	Moscow Landing, AL only, Prairie Bluff Formation					mean	0.332657				mean	21.0859	0.569318
																										±95% confidence interval SE	2.95005						±95% confidence interval SE	0.76073				±95% confidence interval SE	3.15741	0.689697
																										N	9						N	9				N	11	11
Meyer et al. (2018) Reprocessed Clumped Isotope Data Ripley Formation (from O'Hora et al. in revision)
Name	d13C	d18O	d45	d46	d47	d48	d49	D47	D48	D49		SlopeEGL	SlopeETF	IntETF	AcidFF	D47rfac			hgint	egint	SlopeP	IntP	newAFF	BRD47rfac_P	Brand_Temp	Avg. T	SE T		BRd18O(SMOW)_alpha	BRd18O(PDB)_alpha	T47 alpha	dw	Avg d18Ow	SE d18Ow	Notes
CC-RIP-CRAa	1.27535	38.3191	4.76806	3.23348	7.99053	8.10716	1.42948	-0.122644	1.61918	-9.93521		0.0270537	1.05603	0.987256	0.067	0.696455			-0.909686	-0.0587639	1.04968	0.981484	0.072	0.697832	21.9409			Petersen et al 2016	29.9538	-0.927506	1.0291	0.834499
CC-RIP-CRAa	1.20008	38.2109	4.69385	3.12885	7.80101	6.39725	3.24788	-0.131935	0.128916	-7.85608		0.0270537	1.05603	0.987256	0.067	0.692058			-0.909686	-0.0587639	1.04968	0.981484	0.072	0.693462	23.418			Petersen et al 2016	29.8465	-1.03165	1.02878	1.03476
CC-RIP-CRAa	1.16786	38.1763	4.66248	3.09545	7.72015	9.87311	3.5157	-0.147218	3.65002	-7.49325		0.0270537	1.05603	0.987256	0.067	0.678229			-0.909686	-0.0587639	1.04968	0.981484	0.072	0.679716	28.2127	24.5239	1.89306	Petersen et al 2016	29.8122	-1.06488	1.02779	1.97016	1.27981	0.349983
CC-RIP-CUCaU	1.27623	38.895	4.78816	3.78933	8.55286	6.9556	5.25984	-0.130144	-0.632664	-7.25067		0.0265948	1.07708	0.993482	0.067	0.675313			-0.89769	-0.0633955	1.07061	0.987672	0.072	0.676817	29.2538			Petersen et al 2016	30.525	-0.373413	1.02758	2.87027
CC-RIP-CUCaU	1.23072	38.7802	4.74164	3.67843	8.43469	8.43095	-1.58611	-0.0909204	1.0528	-13.7487		0.0265948	1.07708	0.993482	0.067	0.720945			-0.89769	-0.0633955	1.07061	0.987672	0.072	0.722175	14.099			Petersen et al 2016	30.4112	-0.483872	1.03081	-0.389843
CC-RIP-CUCaU	1.19037	38.6344	4.69892	3.53759	8.24565	6.80956	1.51176	-0.0965681	-0.276202	-10.3708		0.0270537	1.05603	0.987256	0.067	0.716703			-0.909686	-0.0587639	1.04968	0.981484	0.072	0.717959	15.4126			Petersen et al 2016	30.2665	-0.62418	1.03052	-0.244553
CC-RIP-CUCaU	1.14807	38.6385	4.65939	3.54148	8.17585	6.43981	4.036	-0.129016	-0.651172	-7.84253		0.0270537	1.05603	0.987256	0.067	0.684431			-0.909686	-0.0587639	1.04968	0.981484	0.072	0.68588	26.0339	21.1998	3.78757	Petersen et al 2016	30.2706	-0.620208	1.02824	1.97952	1.05385	0.81273
CC-RIP-CUCaV	0.869414	38.2519	4.38515	3.16778	7.50183	7.41455	1.77038	-0.14995	1.06222	-9.06828		0.0265948	1.07708	0.993482	0.067	0.684087			-0.89769	-0.0633955	1.07061	0.987672	0.072	0.685538	26.1536			Petersen et al 2016	29.8872	-0.99215	1.02821	1.63075
CC-RIP-CUCaV	1.11292	38.0597	4.60706	2.98274	7.56785	5.37994	1.39318	-0.130967	-0.59109	-9.3155		0.0270537	1.05603	0.987256	0.067	0.699741			-0.909686	-0.0587639	1.04968	0.981484	0.072	0.701098	20.8514			Petersen et al 2016	29.6965	-1.17712	1.02933	0.357929
CC-RIP-CUCaV	0.986371	38.0284	4.48734	2.95227	7.41547	6.90173	-3.37031	-0.129406	0.982406	-13.844		0.0270537	1.05603	0.987256	0.067	0.705743			-0.909686	-0.0587639	1.04968	0.981484	0.072	0.707064	18.8919	21.9656	2.16904	Petersen et al 2016	29.6655	-1.20722	1.02975	-0.0837631	0.634973	0.513957
CC-RIP-TURa	1.59324	38.5427	5.07364	3.44999	8.53404	2.77288	7.52324	-0.109446	-4.11063	-4.6555		0.0258364	1.07263	0.986761	0.067	0.699863			-0.895146	-0.0573925	1.06618	0.980991	0.072	0.70122	20.8111			Petersen et al 2016	30.1756	-0.712353	1.02934	0.814994
CC-RIP-TURa	1.4152	38.3884	4.90152	3.30063	8.20269	6.36107	3.7682	-0.115013	-0.249427	-7.89399		0.0265948	1.07708	0.993482	0.067	0.701641			-0.89769	-0.0633955	1.07061	0.987672	0.072	0.702987	20.2266			Petersen et al 2016	30.0225	-0.860867	1.02946	0.54398
CC-RIP-TURa	1.60615	38.5556	5.08618	3.46244	8.56239	5.67091	2.30541	-0.106413	-1.25727	-9.84759		0.0265948	1.07708	0.993482	0.067	0.7006			-0.89769	-0.0633955	1.07061	0.987672	0.072	0.701952	20.5684	20.5354	0.169539	Petersen et al 2016	30.1884	-0.699962	1.02939	0.776674	0.711883	0.0846772
OC-RIP-EXOa	1.01269	37.6174	4.49826	2.55564	6.99343	5.52502	7.48184	-0.170754	0.405056	-2.34227		0.0270537	1.05603	0.987256	0.067	0.674136			-0.909686	-0.0587639	1.04968	0.981484	0.072	0.675647	29.677			Petersen et al 2016	29.2578	-1.60266	1.02749	1.72049
OC-RIP-EXOa	0.979832	37.4959	4.46338	2.43827	6.84574	3.34612	9.09181	-0.166495	-1.52896	-0.481078		0.0270537	1.05603	0.987256	0.067	0.682853			-0.909686	-0.0587639	1.04968	0.981484	0.072	0.684312	26.5836			Petersen et al 2016	29.1373	-1.71959	1.02812	0.987905
OC-RIP-EXOa	0.68568	36.8589	4.1662	1.82274	5.93078	0.810922	7.21532	-0.166495	-2.82755	-0.819862		0.0270537	1.05603	0.987256	0.067	0.708993			-0.909686	-0.0587639	1.04968	0.981484	0.072	0.710295	17.8469	24.7025	3.54221	Petersen et al 2016	28.5053	-2.33257	1.02998	-1.43179	0.425538	0.952437
OC-RIP-EXOb	0.695024	36.7338	4.17077	1.70206	5.8243	0.502661	6.86575	-0.158612	-2.89448	-0.935004		0.0270537	1.05603	0.987256	0.067	0.72036			-0.909686	-0.0587639	1.04968	0.981484	0.072	0.721593	14.2792			Petersen et al 2016	28.3813	-2.45288	1.03077	-2.31979
OC-RIP-EXOb	0.873237	36.9508	4.34516	1.91188	6.21087	0.983292	6.5502	-0.159415	-2.83325	-1.84379		0.0270537	1.05603	0.987256	0.067	0.708468			-0.909686	-0.0587639	1.04968	0.981484	0.072	0.709773	18.015	16.1471	1.86792	Petersen et al 2016	28.5965	-2.2441	1.02994	-1.30751	-1.81365	0.506141	not included in formation average because N < 3
																										mean	22.5854	Western Tennessee, Ripley Formation (All included in Petersen et al 2016)					mean	0.82121
																										95% confidence interval SE	1.68299						95% confidence interval SE	0.299702
																										N	5						N	5
TR-RIP-EXOa	1.57139	37.8345	5.02944	2.76632	7.7124	4.54191	10.4986	-0.209003	-0.99286	-0.331378		0.0223663	1.04201	1.05555	0.067	0.725023			-0.987466	-0.125097	1.03575	1.04937	0.072	0.726229	12.8528			new	29.4731	-1.39382	1.03109	-1.57298
TR-RIP-EXOa	1.60188	37.587	5.04975	2.52748	7.45805	3.94048	10.7717	-0.248065	-1.11519	0.385408		0.0233427	1.07113	1.03607	0.067	0.650881			-0.942428	-0.103504	1.0647	1.03	0.072	0.652532	38.4217			new	29.2276	-1.63197	1.02577	3.36637
TR-RIP-EXOa	1.90832	38.2368	5.35886	3.1554	8.42783	6.21702	11.6191	-0.218783	-0.103039	-0.334678		0.0233427	1.07113	1.03607	0.067	0.657999			-0.942428	-0.103504	1.0647	1.03	0.072	0.659607	35.6652	28.9799	8.10272	new	29.8722	-1.00668	1.0263	3.47633	1.75657	1.66508	large standard error
TR-RIP-EXOb	0.31288	37.8975	3.8514	2.82451	6.52066	4.60713	11.6314	-0.23939	-1.04395	1.92676		0.0223663	1.04201	1.05555	0.067	0.721135			-0.987466	-0.125097	1.03575	1.04937	0.072	0.722363	14.0407			new	29.5356	-1.33317	1.03083	-1.25195
TR-RIP-EXOb	0.236191	37.7602	3.77489	2.69178	6.31985	4.32484	10.5469	-0.230152	-1.06022	1.19427		0.0233427	1.07113	1.03607	0.067	0.698527			-0.942428	-0.103504	1.0647	1.03	0.072	0.699892	21.2524			new	29.3994	-1.46532	1.02924	0.152825
TR-RIP-EXOb	0.399006	38.1029	3.93904	3.02298	6.81241	5.08712	9.705	-0.234208	-0.962131	-0.46303		0.0233427	1.07113	1.03607	0.067	0.681867			-0.942428	-0.103504	1.0647	1.03	0.072	0.683332	26.9287	20.7406	3.72925	new	29.7394	-1.1355	1.02805	1.64288	0.18125	0.835788
TR-RIP-EXOc	1.18406	37.4365	4.65289	2.38133	6.91455	3.84851	12.1101	-0.236924	-0.915418	2.41888		0.0223663	1.04201	1.05555	0.067	0.714524			-0.987466	-0.125097	1.03575	1.04937	0.072	0.715793	16.0944			new	29.0783	-1.77678	1.03037	-1.2505
TR-RIP-EXOc	1.1913	37.4658	4.66067	2.40967	6.94864	3.7462	12.6411	-0.238839	-1.07373	2.88083		0.0223663	1.04201	1.05555	0.067	0.711734			-0.987466	-0.125097	1.03575	1.04937	0.072	0.71302	16.9744			new	29.1074	-1.74855	1.03017	-1.0334
TR-RIP-EXOc	1.0908	37.5822	4.57033	2.52179	6.96015	4.01582	10.2237	-0.2446	-1.0289	0.362775		0.0233427	1.07113	1.03607	0.067	0.667042			-0.942428	-0.103504	1.0647	1.03	0.072	0.668596	32.2663	21.7784	5.25012	new	29.2228	-1.63657	1.02697	2.19222	-0.0305574	1.11316
TR-RIP-EXOd	-0.405135	37.958	3.18012	2.88143	5.85954	4.85317	9.85898	-0.262108	-0.912695	0.772957		0.0223663	1.04201	1.05555	0.067	0.71287			-0.987466	-0.125097	1.03575	1.04937	0.072	0.714149	16.6151			new	29.5957	-1.27492	1.03025	-0.636431
TR-RIP-EXOd	-0.69931	37.7044	2.89577	2.63598	5.29446	3.99491	13.4025	-0.290922	-1.27724	5.0714		0.0223663	1.04201	1.05555	0.067	0.696016			-0.987466	-0.125097	1.03575	1.04937	0.072	0.697396	22.0875			new	29.3441	-1.51898	1.02906	0.272343
TR-RIP-EXOd	-0.335239	38.1204	3.2511	3.0383	6.06822	4.29298	13.1578	-0.281425	-1.78197	3.65785		0.0233427	1.07113	1.03607	0.067	0.649899			-0.942428	-0.103504	1.0647	1.03	0.072	0.651556	38.808	25.8369	6.67518	new	29.7567	-1.11869	1.0257	3.95414	1.19668	1.40346	large standard error
TR-RIP-EXOe	0.289627	38.1047	3.83653	3.02442	6.69482	5.90925	5.99364	-0.247068	-0.147836	-4.03144		0.0179228	1.05768	0.995859	0.067	0.674628			-0.9164	-0.0668052	1.05133	0.990034	0.072	0.676137	29.4997			new	29.7411	-1.13383	1.02753	2.15593
TR-RIP-EXOe	0.436642	38.5318	3.98869	3.437	7.2933	7.34407	4.40083	-0.213441	0.455139	-6.57213		0.0179228	1.05768	0.995859	0.067	0.69885			-0.9164	-0.0668052	1.05133	0.990034	0.072	0.700213	21.1456	25.3227	4.17704	new	30.1648	-0.722868	1.02926	0.874231	1.51508	0.640847	not included in formation average because N < 3
																										mean	24.334	Tombigbee River, Ripley Formation					mean	0.775987
																										95% confidence interval SE	3.72258						95% confidence interval SE	0.828232			all Ripley Formation analyses
																										N	4						N	4					TEMP	dw
																																						mean	23.3626	0.801111
																																						95% confidence interval SE	2.18338	0.373525
																																						N	9	9

## Sheet: G49998
Jones, M.M., Petersen, S.V., and Curley, A.N., 2022, A tropically hot mid-Cretaceous North American Western Interior Seaway: Geology, v. 50, https://doi.org/10.1130/G49998.1
